# Supplementary material for: Prevalence of Germline Sequence Variations Among Patients With Pancreatic Cancer in China
Source: PubMed Central journal article supplement (PMC8851306; doi:10.1001/jamanetworkopen.2021.48721), 2022-02-16
Supplement: jamanetwopen-e2148721-s001.pdf [file jamanetwopen-e2148721-s001.pdf]

## Supplementary Online Content

Yin L, Wei J, Lu Z, et al. Prevalence of germline sequence variations among patients with pancreatic cancer in China. *JAMA Netw Open*. 2022;5(2):e2148721.  
doi:10.1001/jamanetworkopen.2021.48721

**eAppendix.** Supplementary Materials and Methods

**eFigure.** Comparison of Pathogenic Germline Variants Between Nanjing Cohort and TCGA Cohort

**eTable 1.** Amplicons Coverage of Panel

**eTable 2.** Primers for Sanger Sequencing

**eTable 3.** Prevalence of Pathogenic Germline Mutations in PDAC and Chinese Population

**eTable 4.** Variants of Uncertain Significance and Novel Variants Detected

**eTable 5.** Clinicopathologic Characteristics of Patients With Germline Mutation and Wild-Type Cases

**eTable 6.** Comparison of Nanjing Cohort and Johns Hopkins Cohort on the Pathogenic Germline Mutations of PDAC Patients

**eTable 7.** Prevalence of Pathogenic Germline Mutations in Non-PDAC and Chinese Population

This supplementary material has been provided by the authors to give readers additional information about their work.

## **eAppendix.**

### ***Supplementary Materials and Methods***

#### ***Panel detail***

Known pancreatic cancer susceptibility genes include *BRCA1/2*, *ATM*, *PALB2*, *CDKN2A*, *MLH1*, *MSH2*, *PRSS1*, *STK11*, and *TP53*. Known cancer susceptibility genes include *MSH6*, *PMS2*, *CDH1*, *RAD51C*, *RAD51D*, *BUB1B*, and *FANCF*. Candidate pancreatic cancer susceptibility genes include *FANCA*, *FANCC*, *FANCG*, *FANCL*, *ARID1A*, *RECQL4*, *XRCC2*, *XRCC3*, *ERCC4*, *TERT*, *BRIP1*, *BAP1*, *BUB1*, *BUB3*, and *RNF43*. Pancreatitis associated genes include *AMY2A*, *CEL*, *CELA2A*, *CELA3A*, *CELA3B*, *CFTR*, *CLPS*, *CPA1*, *CPA2*, *CPB1*, *CTRB1*, *CTRB2*, *CTRC*, *ERBB2*, *GRP*, *HNF1B*, *HNF4G*, *IDO2*, *NOC2L*, *PLA2G1B*, *PNLIP*, *PNLIPRP2*, *REG1A*, *SPINK1*, *TNS3*, *TRYP2* and *WEE1*.

#### ***Targeted DNA Sequencing and data analysis***

Twenty ng of DNA (10 ng per primer pool) were used for the AmpliSeq polymerase chain reaction. After the reagent FuPa's digestion, IonCode Barcode Adapters ligation and library clean up (Agencourt AMPure XP Reagent, Beckman Coulter, Brea, CA), libraries were eluted into low Tris-EDTA and quantified (Ion Quantitation Kit, Life-Tech). Emulsion polymerase chain reaction and Ion Sphere Particles (ISPs) enrichment were conducted by Ion Chef. Enriched Ion Sphere Particles were loaded into Ion 530™ Chips for sequencing (Ion GeneStudio S5, Life-Tech). The post-sequencing BAM files were launched in Ion Reporter (version 5.6, Life-Tech) software for variant calling. Alignments were visually verified using Integrative Genomics Viewer (version 2.3, Broad Institute, Cambridge, MA) and NextGENe Viewer (version 2.4, Softgenetics, State College, PA). The functional significance of variants was determined by interrogating the Exome Aggregation Consortium (ExAC) database, ClinVar (updated July 2020) and PubMed. All deleterious mutations were defined with pathogenic or likely pathogenic significances. Germline variants of TCGA pancreatic cancer generated by Huang et al. were

downloaded from the Genomic Data Commons (GDC, <https://gdc.cancer.gov/about-data/publications/PanCanAtlas-Germline-AWG>) of the National Cancer Institute (NCI)

**Figure legends**

**eFigure.** A. Comparison of Pathogenic Germline Variants between Nanjing Cohort and TCGA cohort. B. Loci of *BRCA2* variants and domains in proteins are shown by lollipop structures for 3 cohorts. Protein domains are also shown in different colors. The x axis reflects the number of amino acid residues.

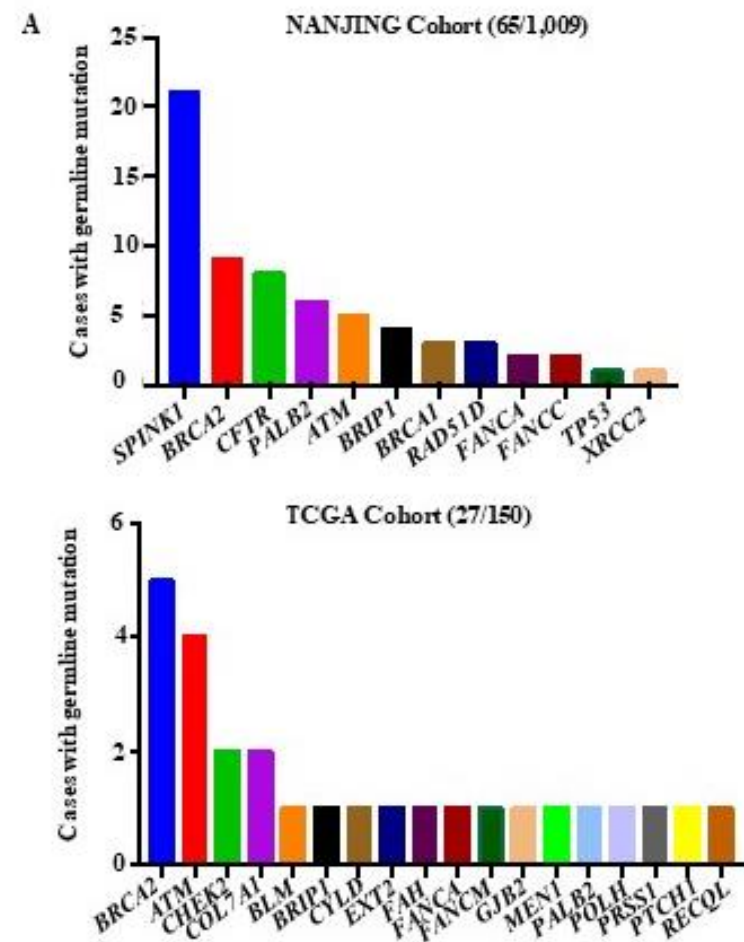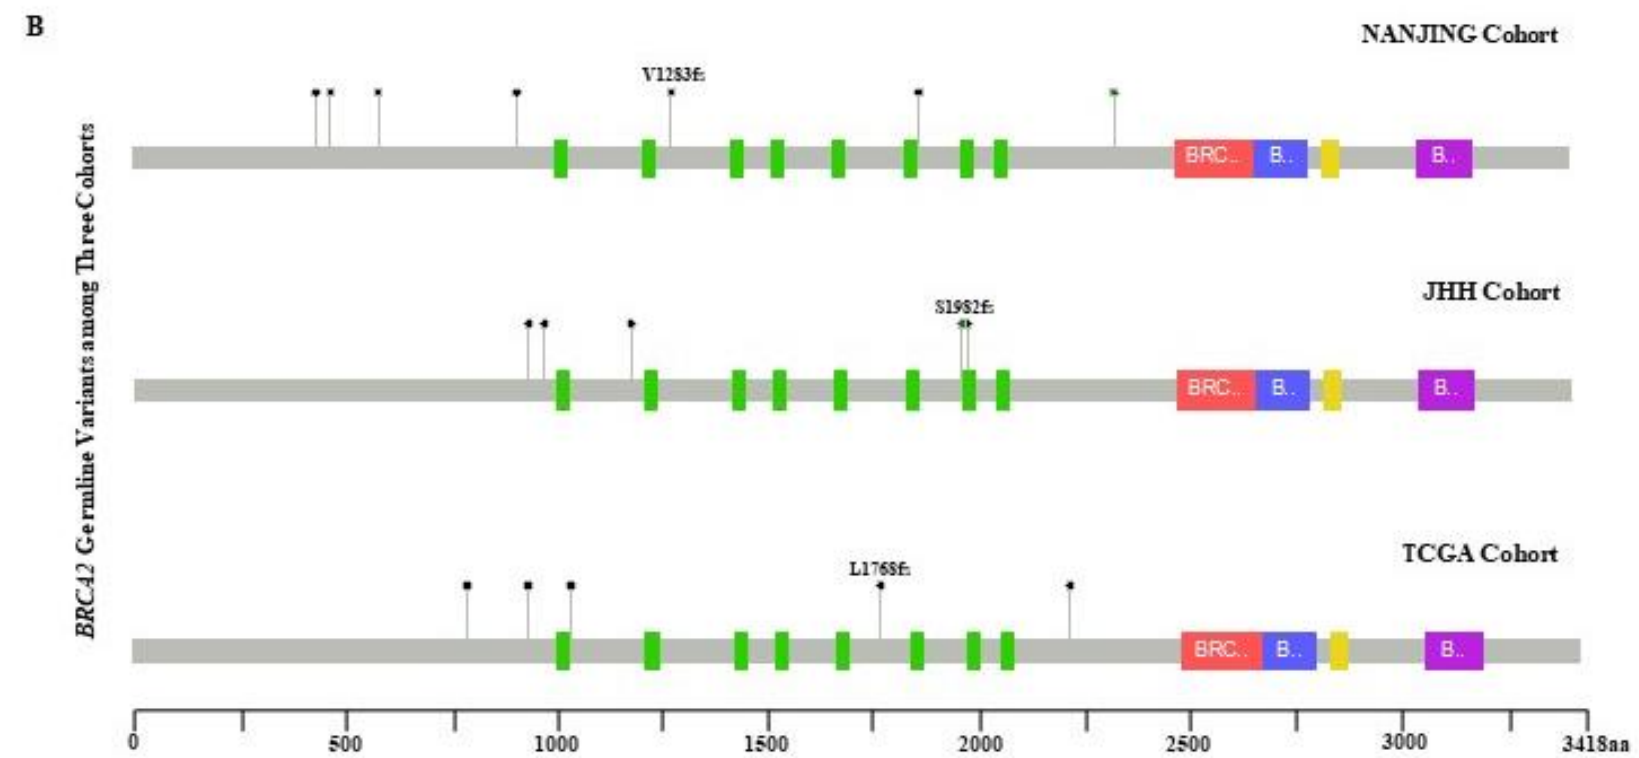

*Supplementary Tables S1-S7*

**eTable 1. Amplicons coverage of panel.**

| <b>Target_ID</b> | <b>Gene Symbol</b> | <b>Chromosome</b> | <b>Chr_Start</b> | <b>Chr_End</b> | <b>Number of Amplicons</b> |
|------------------|--------------------|-------------------|------------------|----------------|----------------------------|
| 961179           | AMY2A              | chr1              | 104160057        | 104160235      | 2                          |
| 961181           | AMY2A              | chr1              | 104160570        | 104160727      | 1                          |
| 961186           | AMY2A              | chr1              | 104161527        | 104161735      | 1                          |
| 961182           | AMY2A              | chr1              | 104162170        | 104162411      | 2                          |
| 961178           | AMY2A              | chr1              | 104163167        | 104163311      | 1                          |
| 961180           | AMY2A              | chr1              | 104164193        | 104164326      | 2                          |
| 961187           | AMY2A              | chr1              | 104164410        | 104164520      | 1                          |
| 961184           | AMY2A              | chr1              | 104166482        | 104166611      | 1                          |
| 961185           | AMY2A              | chr1              | 104166712        | 104166848      | 1                          |
| 961183           | AMY2A              | chr1              | 104168173        | 104168373      | 1                          |
| 438331           | ARIDIA             | chr1              | 27022889         | 27024036       | 4                          |
| 436487           | ARIDIA             | chr1              | 27056136         | 27056359       | 1                          |
| 436490           | ARIDIA             | chr1              | 27057637         | 27058100       | 2                          |
| 436486           | ARIDIA             | chr1              | 27059161         | 27059288       | 1                          |
| 436485           | ARIDIA             | chr1              | 27087341         | 27087592       | 1                          |
| 436474           | ARIDIA             | chr1              | 27087869         | 27087969       | 1                          |
| 436481           | ARIDIA             | chr1              | 27088637         | 27088815       | 1                          |
| 436482           | ARIDIA             | chr1              | 27089458         | 27089781       | 2                          |
| 436476           | ARIDIA             | chr1              | 27092706         | 27092862       | 2                          |
| 436484           | ARIDIA             | chr1              | 27092942         | 27093062       | 1                          |
| 436475           | ARIDIA             | chr1              | 27094275         | 27094495       | 1                          |
| 436480           | ARIDIA             | chr1              | 27097604         | 27097822       | 1                          |
| 436471           | ARIDIA             | chr1              | 27098985         | 27099128       | 1                          |
| 436473           | ARIDIA             | chr1              | 27099297         | 27099483       | 1                          |
| 436479           | ARIDIA             | chr1              | 27099831         | 27099992       | 2                          |
| 436489           | ARIDIA             | chr1              | 27100065         | 27100213       | 2                          |
| 436470           | ARIDIA             | chr1              | 27100287         | 27100394       | 2                          |
| 436483           | ARIDIA             | chr1              | 27101465         | 27101716       | 2                          |
| 436477           | ARIDIA             | chr1              | 27100814         | 27101716       | 4                          |
| 436472           | ARIDIA             | chr1              | 27102062         | 27102203       | 1                          |
| 438332           | ARIDIA             | chr1              | 27105508         | 27107252       | 7                          |
| 423445           | ATM                | chr11             | 108098346        | 108098428      | 2                          |
| 423411           | ATM                | chr11             | 108098497        | 108098620      | 2                          |
| 423413           | ATM                | chr11             | 108099899        | 108100055      | 1                          |
| 423396           | ATM                | chr11             | 108106391        | 108106566      | 1                          |
| 423429           | ATM                | chr11             | 108114674        | 108114850      | 1                          |

|        |            |       |           |           |   |
|--------|------------|-------|-----------|-----------|---|
| 423399 | <i>ATM</i> | chr11 | 108115509 | 108115758 | 1 |
| 423446 | <i>ATM</i> | chr11 | 108117685 | 108117859 | 1 |
| 423412 | <i>ATM</i> | chr11 | 108119654 | 108119834 | 1 |
| 423389 | <i>ATM</i> | chr11 | 108121422 | 108121804 | 2 |
| 423419 | <i>ATM</i> | chr11 | 108122558 | 108122763 | 1 |
| 423425 | <i>ATM</i> | chr11 | 108123538 | 108123644 | 1 |
| 423422 | <i>ATM</i> | chr11 | 108124535 | 108124771 | 1 |
| 423394 | <i>ATM</i> | chr11 | 108126936 | 108127072 | 2 |
| 423442 | <i>ATM</i> | chr11 | 108128202 | 108128338 | 1 |
| 423431 | <i>ATM</i> | chr11 | 108129707 | 108129807 | 1 |
| 423410 | <i>ATM</i> | chr11 | 108137892 | 108138074 | 1 |
| 423385 | <i>ATM</i> | chr11 | 108139131 | 108139341 | 1 |
| 423417 | <i>ATM</i> | chr11 | 108141785 | 108141878 | 1 |
| 423407 | <i>ATM</i> | chr11 | 108141972 | 108142138 | 1 |
| 423409 | <i>ATM</i> | chr11 | 108143253 | 108143339 | 1 |
| 423401 | <i>ATM</i> | chr11 | 108143443 | 108143584 | 2 |
| 423435 | <i>ATM</i> | chr11 | 108150212 | 108150340 | 1 |
| 423423 | <i>ATM</i> | chr11 | 108151716 | 108151900 | 1 |
| 423430 | <i>ATM</i> | chr11 | 108153431 | 108153611 | 1 |
| 423406 | <i>ATM</i> | chr11 | 108154948 | 108155205 | 2 |
| 423405 | <i>ATM</i> | chr11 | 108158321 | 108158447 | 1 |
| 423424 | <i>ATM</i> | chr11 | 108159698 | 108159835 | 1 |
| 423415 | <i>ATM</i> | chr11 | 108160323 | 108160533 | 1 |
| 423438 | <i>ATM</i> | chr11 | 108163340 | 108163525 | 2 |
| 423443 | <i>ATM</i> | chr11 | 108164034 | 108164209 | 2 |
| 423398 | <i>ATM</i> | chr11 | 108165648 | 108165791 | 1 |
| 423426 | <i>ATM</i> | chr11 | 108168008 | 108168114 | 1 |
| 423420 | <i>ATM</i> | chr11 | 108170435 | 108170617 | 1 |
| 423444 | <i>ATM</i> | chr11 | 108172369 | 108172521 | 1 |
| 423439 | <i>ATM</i> | chr11 | 108173574 | 108173761 | 1 |
| 423397 | <i>ATM</i> | chr11 | 108175396 | 108175584 | 1 |
| 423402 | <i>ATM</i> | chr11 | 108178618 | 108178716 | 1 |
| 423434 | <i>ATM</i> | chr11 | 108180881 | 108181047 | 1 |
| 423428 | <i>ATM</i> | chr11 | 108183132 | 108183230 | 1 |
| 423387 | <i>ATM</i> | chr11 | 108186544 | 108186643 | 2 |
| 423391 | <i>ATM</i> | chr11 | 108186732 | 108186845 | 1 |
| 423418 | <i>ATM</i> | chr11 | 108188094 | 108188253 | 1 |
| 423392 | <i>ATM</i> | chr11 | 108190675 | 108190790 | 1 |
| 423403 | <i>ATM</i> | chr11 | 108192022 | 108192152 | 1 |
| 423393 | <i>ATM</i> | chr11 | 108196031 | 108196276 | 1 |
| 423433 | <i>ATM</i> | chr11 | 108196779 | 108196957 | 2 |

|        |              |       |           |           |   |
|--------|--------------|-------|-----------|-----------|---|
| 423395 | <i>ATM</i>   | chr11 | 108198366 | 108198490 | 1 |
| 423436 | <i>ATM</i>   | chr11 | 108199742 | 108199970 | 2 |
| 423427 | <i>ATM</i>   | chr11 | 108200935 | 108201153 | 1 |
| 423437 | <i>ATM</i>   | chr11 | 108202165 | 108202289 | 2 |
| 423432 | <i>ATM</i>   | chr11 | 108202600 | 108202769 | 1 |
| 423404 | <i>ATM</i>   | chr11 | 108203483 | 108203632 | 1 |
| 423388 | <i>ATM</i>   | chr11 | 108204607 | 108204700 | 1 |
| 423414 | <i>ATM</i>   | chr11 | 108205690 | 108205841 | 1 |
| 423440 | <i>ATM</i>   | chr11 | 108206566 | 108206693 | 1 |
| 423416 | <i>ATM</i>   | chr11 | 108213943 | 108214103 | 1 |
| 423400 | <i>ATM</i>   | chr11 | 108216464 | 108216640 | 1 |
| 423390 | <i>ATM</i>   | chr11 | 108218000 | 108218097 | 1 |
| 423386 | <i>ATM</i>   | chr11 | 108224487 | 108224612 | 1 |
| 423408 | <i>ATM</i>   | chr11 | 108225532 | 108225606 | 1 |
| 423441 | <i>ATM</i>   | chr11 | 108235803 | 108235950 | 1 |
| 423421 | <i>ATM</i>   | chr11 | 108236046 | 108236240 | 1 |
| 438559 | <i>BAP1</i>  | chr3  | 52436298  | 52436442  | 1 |
| 438561 | <i>BAP1</i>  | chr3  | 52436612  | 52436695  | 2 |
| 438555 | <i>BAP1</i>  | chr3  | 52436789  | 52436892  | 1 |
| 438552 | <i>BAP1</i>  | chr3  | 52437148  | 52437319  | 1 |
| 438549 | <i>BAP1</i>  | chr3  | 52437426  | 52437915  | 3 |
| 438557 | <i>BAP1</i>  | chr3  | 52438463  | 52438607  | 1 |
| 438563 | <i>BAP1</i>  | chr3  | 52439120  | 52439315  | 1 |
| 438556 | <i>BAP1</i>  | chr3  | 52439775  | 52439933  | 1 |
| 438551 | <i>BAP1</i>  | chr3  | 52440263  | 52440397  | 1 |
| 438550 | <i>BAP1</i>  | chr3  | 52440839  | 52440928  | 1 |
| 438562 | <i>BAP1</i>  | chr3  | 52441184  | 52441337  | 2 |
| 438564 | <i>BAP1</i>  | chr3  | 52441409  | 52441481  | 2 |
| 438554 | <i>BAP1</i>  | chr3  | 52441968  | 52442098  | 1 |
| 438558 | <i>BAP1</i>  | chr3  | 52442484  | 52442627  | 1 |
| 438553 | <i>BAP1</i>  | chr3  | 52443564  | 52443629  | 2 |
| 438560 | <i>BAP1</i>  | chr3  | 52443724  | 52443764  | 2 |
| 438565 | <i>BAP1</i>  | chr3  | 52443852  | 52443899  | 1 |
| 422979 | <i>BRCA1</i> | chr17 | 41197795  | 41197824  | 1 |
| 422959 | <i>BRCA1</i> | chr17 | 41197689  | 41197824  | 1 |
| 422972 | <i>BRCA1</i> | chr17 | 41199654  | 41199725  | 1 |
| 422962 | <i>BRCA1</i> | chr17 | 41201132  | 41201216  | 1 |
| 422960 | <i>BRCA1</i> | chr17 | 41203074  | 41203139  | 1 |
| 422958 | <i>BRCA1</i> | chr17 | 41209063  | 41209157  | 1 |
| 422974 | <i>BRCA1</i> | chr17 | 41215344  | 41215395  | 1 |
| 422977 | <i>BRCA1</i> | chr17 | 41215885  | 41215973  | 1 |

|        |              |       |          |          |    |
|--------|--------------|-------|----------|----------|----|
| 422965 | <i>BRCA1</i> | chr17 | 41219619 | 41219717 | 1  |
| 422957 | <i>BRCA1</i> | chr17 | 41222939 | 41223260 | 2  |
| 422971 | <i>BRCA1</i> | chr17 | 41226342 | 41226543 | 1  |
| 422969 | <i>BRCA1</i> | chr17 | 41228499 | 41228633 | 1  |
| 422964 | <i>BRCA1</i> | chr17 | 41228499 | 41228636 | 1  |
| 422956 | <i>BRCA1</i> | chr17 | 41231345 | 41231421 | 1  |
| 422970 | <i>BRCA1</i> | chr17 | 41234415 | 41234597 | 1  |
| 422973 | <i>BRCA1</i> | chr17 | 41242955 | 41243054 | 1  |
| 422975 | <i>BRCA1</i> | chr17 | 41243446 | 41246882 | 12 |
| 422961 | <i>BRCA1</i> | chr17 | 41246755 | 41246882 | 1  |
| 422968 | <i>BRCA1</i> | chr17 | 41247857 | 41247944 | 1  |
| 422976 | <i>BRCA1</i> | chr17 | 41249255 | 41249311 | 1  |
| 422978 | <i>BRCA1</i> | chr17 | 41251786 | 41251902 | 1  |
| 422966 | <i>BRCA1</i> | chr17 | 41256133 | 41256283 | 2  |
| 422967 | <i>BRCA1</i> | chr17 | 41256879 | 41256978 | 1  |
| 422954 | <i>BRCA1</i> | chr17 | 41258467 | 41258548 | 1  |
| 422955 | <i>BRCA1</i> | chr17 | 41258467 | 41258555 | 1  |
| 422963 | <i>BRCA1</i> | chr17 | 41267737 | 41267801 | 1  |
| 422953 | <i>BRCA1</i> | chr17 | 41276028 | 41276118 | 1  |
| 423353 | <i>BRCA2</i> | chr13 | 32890592 | 32890669 | 1  |
| 423332 | <i>BRCA2</i> | chr13 | 32893208 | 32893467 | 1  |
| 423344 | <i>BRCA2</i> | chr13 | 32899207 | 32899326 | 1  |
| 423339 | <i>BRCA2</i> | chr13 | 32900232 | 32900292 | 2  |
| 423352 | <i>BRCA2</i> | chr13 | 32900373 | 32900424 | 2  |
| 423337 | <i>BRCA2</i> | chr13 | 32900630 | 32900755 | 1  |
| 423342 | <i>BRCA2</i> | chr13 | 32903574 | 32903634 | 1  |
| 423351 | <i>BRCA2</i> | chr13 | 32905050 | 32905172 | 1  |
| 423331 | <i>BRCA2</i> | chr13 | 32906403 | 32907529 | 6  |
| 423347 | <i>BRCA2</i> | chr13 | 32910396 | 32915338 | 19 |
| 423336 | <i>BRCA2</i> | chr13 | 32918689 | 32918795 | 2  |
| 423345 | <i>BRCA2</i> | chr13 | 32920958 | 32921038 | 1  |
| 423348 | <i>BRCA2</i> | chr13 | 32928992 | 32929430 | 2  |
| 423330 | <i>BRCA2</i> | chr13 | 32930559 | 32930751 | 1  |
| 423354 | <i>BRCA2</i> | chr13 | 32931873 | 32932071 | 2  |
| 423349 | <i>BRCA2</i> | chr13 | 32936654 | 32936835 | 1  |
| 423335 | <i>BRCA2</i> | chr13 | 32937310 | 32937675 | 2  |
| 423338 | <i>BRCA2</i> | chr13 | 32944533 | 32944699 | 2  |
| 423350 | <i>BRCA2</i> | chr13 | 32945087 | 32945242 | 2  |
| 423340 | <i>BRCA2</i> | chr13 | 32950801 | 32950933 | 1  |
| 423346 | <i>BRCA2</i> | chr13 | 32953448 | 32953657 | 2  |
| 423334 | <i>BRCA2</i> | chr13 | 32953881 | 32954055 | 2  |



|         |              |       |           |           |   |
|---------|--------------|-------|-----------|-----------|---|
| 423341  | <i>BRCA2</i> | chr13 | 32954138  | 32954287  | 1 |
| 298058  | <i>BRCA2</i> | chr13 | 32968820  | 32969075  | 2 |
| 423343  | <i>BRCA2</i> | chr13 | 32971029  | 32971186  | 1 |
| 423333  | <i>BRCA2</i> | chr13 | 32972293  | 32972912  | 3 |
| 433507  | <i>BRIP1</i> | chr17 | 59760651  | 59761506  | 3 |
| 433505  | <i>BRIP1</i> | chr17 | 59763191  | 59763531  | 2 |
| 433501  | <i>BRIP1</i> | chr17 | 59770785  | 59770878  | 1 |
| 433506  | <i>BRIP1</i> | chr17 | 59793306  | 59793429  | 2 |
| 433490  | <i>BRIP1</i> | chr17 | 59820368  | 59820500  | 1 |
| 433502  | <i>BRIP1</i> | chr17 | 59821787  | 59821957  | 1 |
| 433497  | <i>BRIP1</i> | chr17 | 59853756  | 59853928  | 1 |
| 433492  | <i>BRIP1</i> | chr17 | 59857616  | 59857767  | 1 |
| 433508  | <i>BRIP1</i> | chr17 | 59858195  | 59858371  | 1 |
| 433493  | <i>BRIP1</i> | chr17 | 59861625  | 59861790  | 1 |
| 433496  | <i>BRIP1</i> | chr17 | 59870952  | 59871095  | 1 |
| 433491  | <i>BRIP1</i> | chr17 | 59876455  | 59876665  | 1 |
| 433504  | <i>BRIP1</i> | chr17 | 59878608  | 59878840  | 1 |
| 433503  | <i>BRIP1</i> | chr17 | 59885822  | 59886123  | 2 |
| 433499  | <i>BRIP1</i> | chr17 | 59924456  | 59924586  | 1 |
| 433498  | <i>BRIP1</i> | chr17 | 59926484  | 59926622  | 1 |
| 433494  | <i>BRIP1</i> | chr17 | 59934413  | 59934597  | 1 |
| 433495  | <i>BRIP1</i> | chr17 | 59937151  | 59937273  | 1 |
| 433500  | <i>BRIP1</i> | chr17 | 59938802  | 59938905  | 1 |
| 884102  | <i>BUB1</i>  | chr2  | 111395535 | 111395741 | 1 |
| 869658  | <i>BUB1</i>  | chr2  | 111397313 | 111397430 | 1 |
| 1319006 | <i>BUB1</i>  | chr2  | 111398605 | 111398774 | 1 |
| 869665  | <i>BUB1</i>  | chr2  | 111398605 | 111398787 | 1 |
| 869657  | <i>BUB1</i>  | chr2  | 111398878 | 111399046 | 1 |
| 869670  | <i>BUB1</i>  | chr2  | 111399213 | 111399385 | 1 |
| 869654  | <i>BUB1</i>  | chr2  | 111399690 | 111399816 | 2 |
| 869675  | <i>BUB1</i>  | chr2  | 111406805 | 111406959 | 1 |
| 869666  | <i>BUB1</i>  | chr2  | 111408117 | 111408366 | 1 |
| 869671  | <i>BUB1</i>  | chr2  | 111411007 | 111411105 | 1 |
| 869663  | <i>BUB1</i>  | chr2  | 111413310 | 111413498 | 1 |
| 869661  | <i>BUB1</i>  | chr2  | 111414607 | 111414699 | 1 |
| 869667  | <i>BUB1</i>  | chr2  | 111415117 | 111415227 | 1 |
| 869662  | <i>BUB1</i>  | chr2  | 111415981 | 111416102 | 2 |
| 869669  | <i>BUB1</i>  | chr2  | 111416185 | 111416324 | 2 |
| 869660  | <i>BUB1</i>  | chr2  | 111417549 | 111417618 | 1 |
| 869656  | <i>BUB1</i>  | chr2  | 111419153 | 111419423 | 1 |
| 869676  | <i>BUB1</i>  | chr2  | 111423834 | 111423996 | 1 |

|        |              |       |           |           |   |
|--------|--------------|-------|-----------|-----------|---|
| 869673 | <i>BUB1</i>  | chr2  | 111425092 | 111425287 | 2 |
| 869659 | <i>BUB1</i>  | chr2  | 111425368 | 111425431 | 1 |
| 869655 | <i>BUB1</i>  | chr2  | 111427024 | 111427135 | 1 |
| 869668 | <i>BUB1</i>  | chr2  | 111428096 | 111428150 | 1 |
| 869664 | <i>BUB1</i>  | chr2  | 111430232 | 111430439 | 1 |
| 869678 | <i>BUB1</i>  | chr2  | 111431657 | 111431806 | 1 |
| 869674 | <i>BUB1</i>  | chr2  | 111431877 | 111431947 | 2 |
| 884101 | <i>BUB1</i>  | chr2  | 111435541 | 111435577 | 1 |
| 437307 | <i>BUB1B</i> | chr15 | 40453416  | 40453461  | 1 |
| 437328 | <i>BUB1B</i> | chr15 | 40457248  | 40457402  | 1 |
| 437317 | <i>BUB1B</i> | chr15 | 40462257  | 40462327  | 1 |
| 437308 | <i>BUB1B</i> | chr15 | 40462732  | 40462887  | 1 |
| 437322 | <i>BUB1B</i> | chr15 | 40468672  | 40468879  | 1 |
| 437325 | <i>BUB1B</i> | chr15 | 40475909  | 40476089  | 1 |
| 437310 | <i>BUB1B</i> | chr15 | 40477360  | 40477585  | 1 |
| 437320 | <i>BUB1B</i> | chr15 | 40477746  | 40477848  | 1 |
| 437312 | <i>BUB1B</i> | chr15 | 40488740  | 40488980  | 1 |
| 437321 | <i>BUB1B</i> | chr15 | 40491810  | 40491933  | 1 |
| 437318 | <i>BUB1B</i> | chr15 | 40492439  | 40492565  | 1 |
| 437324 | <i>BUB1B</i> | chr15 | 40493126  | 40493186  | 1 |
| 437326 | <i>BUB1B</i> | chr15 | 40494600  | 40494671  | 2 |
| 437316 | <i>BUB1B</i> | chr15 | 40494784  | 40494900  | 1 |
| 437319 | <i>BUB1B</i> | chr15 | 40498379  | 40498664  | 2 |
| 437323 | <i>BUB1B</i> | chr15 | 40500832  | 40500976  | 1 |
| 437309 | <i>BUB1B</i> | chr15 | 40501830  | 40501981  | 1 |
| 437327 | <i>BUB1B</i> | chr15 | 40502305  | 40502416  | 1 |
| 437313 | <i>BUB1B</i> | chr15 | 40504694  | 40504854  | 1 |
| 437315 | <i>BUB1B</i> | chr15 | 40505527  | 40505680  | 1 |
| 437314 | <i>BUB1B</i> | chr15 | 40509691  | 40509873  | 1 |
| 437311 | <i>BUB1B</i> | chr15 | 40510651  | 40510768  | 1 |
| 437306 | <i>BUB1B</i> | chr15 | 40512759  | 40512965  | 1 |
| 884107 | <i>BUB3</i>  | chr10 | 124914428 | 124914633 | 2 |
| 884110 | <i>BUB3</i>  | chr10 | 124915168 | 124915248 | 1 |
| 884106 | <i>BUB3</i>  | chr10 | 124917239 | 124917401 | 1 |
| 884105 | <i>BUB3</i>  | chr10 | 124919917 | 124920086 | 1 |
| 884108 | <i>BUB3</i>  | chr10 | 124921746 | 124921934 | 1 |
| 884103 | <i>BUB3</i>  | chr10 | 124922122 | 124922349 | 1 |
| 884109 | <i>BUB3</i>  | chr10 | 124923330 | 124923356 | 1 |
| 884104 | <i>BUB3</i>  | chr10 | 124924557 | 124924577 | 1 |
| 433427 | <i>CDH1</i>  | chr16 | 68771313  | 68771371  | 1 |
| 433430 | <i>CDH1</i>  | chr16 | 68772194  | 68772319  | 1 |

|         |               |       |           |           |   |
|---------|---------------|-------|-----------|-----------|---|
| 433425  | <i>CDH1</i>   | chr16 | 68835567  | 68835801  | 1 |
| 433418  | <i>CDH1</i>   | chr16 | 68842321  | 68842475  | 1 |
| 433423  | <i>CDH1</i>   | chr16 | 68842590  | 68842756  | 1 |
| 433432  | <i>CDH1</i>   | chr16 | 68844094  | 68844249  | 1 |
| 433429  | <i>CDH1</i>   | chr16 | 68845581  | 68845767  | 1 |
| 433428  | <i>CDH1</i>   | chr16 | 68846032  | 68846171  | 1 |
| 433422  | <i>CDH1</i>   | chr16 | 68847210  | 68847403  | 1 |
| 433417  | <i>CDH1</i>   | chr16 | 68849412  | 68849667  | 1 |
| 2493448 | <i>CDH1</i>   | chr16 | 68849640  | 68849667  | 1 |
| 433426  | <i>CDH1</i>   | chr16 | 68853177  | 68853333  | 1 |
| 433431  | <i>CDH1</i>   | chr16 | 68855898  | 68856133  | 1 |
| 433424  | <i>CDH1</i>   | chr16 | 68857296  | 68857534  | 1 |
| 2493447 | <i>CDH1</i>   | chr16 | 68857325  | 68857534  | 1 |
| 433421  | <i>CDH1</i>   | chr16 | 68862071  | 68862212  | 1 |
| 433420  | <i>CDH1</i>   | chr16 | 68863551  | 68863705  | 1 |
| 433419  | <i>CDH1</i>   | chr16 | 68867187  | 68867407  | 1 |
| 433711  | <i>CDKN2A</i> | chr9  | 21968222  | 21968246  | 1 |
| 433708  | <i>CDKN2A</i> | chr9  | 21968718  | 21968775  | 1 |
| 433714  | <i>CDKN2A</i> | chr9  | 21970895  | 21971212  | 1 |
| 433713  | <i>CDKN2A</i> | chr9  | 21970996  | 21971212  | 1 |
| 433712  | <i>CDKN2A</i> | chr9  | 21974470  | 21974831  | 2 |
| 433709  | <i>CDKN2A</i> | chr9  | 21974671  | 21974831  | 2 |
| 433710  | <i>CDKN2A</i> | chr9  | 21994132  | 21994335  | 1 |
| 472413  | <i>CEL</i>    | chr9  | 135937375 | 135937460 | 1 |
| 472290  | <i>CEL</i>    | chr9  | 135939785 | 135939946 | 2 |
| 472292  | <i>CEL</i>    | chr9  | 135940021 | 135940154 | 1 |
| 472287  | <i>CEL</i>    | chr9  | 135940421 | 135940629 | 2 |
| 472286  | <i>CEL</i>    | chr9  | 135941911 | 135942052 | 1 |
| 472295  | <i>CEL</i>    | chr9  | 135942219 | 135942337 | 1 |
| 472293  | <i>CEL</i>    | chr9  | 135942469 | 135942597 | 1 |
| 472288  | <i>CEL</i>    | chr9  | 135944053 | 135944250 | 2 |
| 472296  | <i>CEL</i>    | chr9  | 135944437 | 135944651 | 1 |
| 472291  | <i>CEL</i>    | chr9  | 135945842 | 135946050 | 2 |
| 472412  | <i>CEL</i>    | chr9  | 135946368 | 135947156 | 2 |
| 2059527 | <i>CELA2A</i> | chr1  | 15783243  | 15783293  | 1 |
| 2059526 | <i>CELA2A</i> | chr1  | 15783575  | 15783674  | 1 |
| 2059522 | <i>CELA2A</i> | chr1  | 15788050  | 15788158  | 1 |
| 2059524 | <i>CELA2A</i> | chr1  | 15789222  | 15789361  | 1 |
| 2059525 | <i>CELA2A</i> | chr1  | 15789875  | 15790022  | 1 |
| 2059523 | <i>CELA2A</i> | chr1  | 15792488  | 15792644  | 1 |
| 2059521 | <i>CELA2A</i> | chr1  | 15793875  | 15794038  | 2 |

|         |               |      |           |           |   |
|---------|---------------|------|-----------|-----------|---|
| 2059520 | <i>CELA2A</i> | chr1 | 15798479  | 15798507  | 1 |
| 2059501 | <i>CELA3A</i> | chr1 | 22328162  | 22328215  | 1 |
| 2059508 | <i>CELA3A</i> | chr1 | 22329490  | 22329586  | 1 |
| 2059507 | <i>CELA3A</i> | chr1 | 22331934  | 22332042  | 2 |
| 2059506 | <i>CELA3A</i> | chr1 | 22332149  | 22332294  | 2 |
| 2059505 | <i>CELA3A</i> | chr1 | 22333365  | 22333512  | 1 |
| 2059502 | <i>CELA3A</i> | chr1 | 22333860  | 22334013  | 2 |
| 2059503 | <i>CELA3A</i> | chr1 | 22336192  | 22336355  | 1 |
| 2059504 | <i>CELA3A</i> | chr1 | 22338937  | 22338965  | 1 |
| 2059535 | <i>CELA3B</i> | chr1 | 22303527  | 22303580  | 1 |
| 2059528 | <i>CELA3B</i> | chr1 | 22304856  | 22304952  | 1 |
| 2059531 | <i>CELA3B</i> | chr1 | 22307311  | 22307419  | 2 |
| 2059529 | <i>CELA3B</i> | chr1 | 22307525  | 22307670  | 2 |
| 2059530 | <i>CELA3B</i> | chr1 | 22310181  | 22310328  | 1 |
| 2059534 | <i>CELA3B</i> | chr1 | 22310676  | 22310829  | 2 |
| 2059532 | <i>CELA3B</i> | chr1 | 22313018  | 22313181  | 1 |
| 2059533 | <i>CELA3B</i> | chr1 | 22315749  | 22315777  | 1 |
| 426194  | <i>CFTR</i>   | chr7 | 117120143 | 117120206 | 1 |
| 426191  | <i>CFTR</i>   | chr7 | 117144301 | 117144422 | 1 |
| 426188  | <i>CFTR</i>   | chr7 | 117149082 | 117149201 | 1 |
| 426201  | <i>CFTR</i>   | chr7 | 117170947 | 117171173 | 2 |
| 426204  | <i>CFTR</i>   | chr7 | 117174324 | 117174424 | 1 |
| 426207  | <i>CFTR</i>   | chr7 | 117175296 | 117175470 | 1 |
| 426202  | <i>CFTR</i>   | chr7 | 117176596 | 117176732 | 2 |
| 426210  | <i>CFTR</i>   | chr7 | 117180148 | 117180405 | 2 |
| 426200  | <i>CFTR</i>   | chr7 | 117182064 | 117182167 | 1 |
| 426206  | <i>CFTR</i>   | chr7 | 117188689 | 117188882 | 1 |
| 426198  | <i>CFTR</i>   | chr7 | 117199512 | 117199714 | 1 |
| 426193  | <i>CFTR</i>   | chr7 | 117227787 | 117227892 | 1 |
| 426196  | <i>CFTR</i>   | chr7 | 117230401 | 117230498 | 1 |
| 426205  | <i>CFTR</i>   | chr7 | 117231982 | 117232716 | 3 |
| 426190  | <i>CFTR</i>   | chr7 | 117234978 | 117235117 | 2 |
| 426197  | <i>CFTR</i>   | chr7 | 117242874 | 117242922 | 1 |
| 426203  | <i>CFTR</i>   | chr7 | 117243580 | 117243841 | 1 |
| 426209  | <i>CFTR</i>   | chr7 | 117246722 | 117246812 | 1 |
| 426214  | <i>CFTR</i>   | chr7 | 117250567 | 117250728 | 1 |
| 426189  | <i>CFTR</i>   | chr7 | 117251629 | 117251867 | 2 |
| 426199  | <i>CFTR</i>   | chr7 | 117254661 | 117254772 | 1 |
| 426192  | <i>CFTR</i>   | chr7 | 117267570 | 117267829 | 1 |
| 426211  | <i>CFTR</i>   | chr7 | 117282486 | 117282652 | 1 |
| 426208  | <i>CFTR</i>   | chr7 | 117292890 | 117292990 | 1 |

|         |              |       |           |           |   |
|---------|--------------|-------|-----------|-----------|---|
| 426212  | <i>CFTR</i>  | chr7  | 117304736 | 117304919 | 1 |
| 426195  | <i>CFTR</i>  | chr7  | 117305507 | 117305623 | 1 |
| 426213  | <i>CFTR</i>  | chr7  | 117306956 | 117307167 | 1 |
| 543639  | <i>CLPS</i>  | chr6  | 35762917  | 35763059  | 1 |
| 543637  | <i>CLPS</i>  | chr6  | 35763502  | 35763635  | 1 |
| 543638  | <i>CLPS</i>  | chr6  | 35764580  | 35764632  | 1 |
| 543636  | <i>CLPS</i>  | chr6  | 35764976  | 35765070  | 1 |
| 1387507 | <i>CPAI</i>  | chr7  | 130020356 | 130020431 | 1 |
| 1387503 | <i>CPAI</i>  | chr7  | 130020933 | 130021025 | 2 |
| 1387502 | <i>CPAI</i>  | chr7  | 130021465 | 130021709 | 2 |
| 1387505 | <i>CPAI</i>  | chr7  | 130021943 | 130022055 | 1 |
| 1387504 | <i>CPAI</i>  | chr7  | 130023226 | 130023338 | 1 |
| 1387501 | <i>CPAI</i>  | chr7  | 130023519 | 130023640 | 1 |
| 1387498 | <i>CPAI</i>  | chr7  | 130024371 | 130024472 | 1 |
| 1387499 | <i>CPAI</i>  | chr7  | 130024981 | 130025191 | 1 |
| 1387506 | <i>CPAI</i>  | chr7  | 130025674 | 130025769 | 1 |
| 1387500 | <i>CPAI</i>  | chr7  | 130027659 | 130027857 | 1 |
| 1480947 | <i>CPA2</i>  | chr7  | 129906716 | 129906797 | 1 |
| 1480951 | <i>CPA2</i>  | chr7  | 129908763 | 129908855 | 1 |
| 1480946 | <i>CPA2</i>  | chr7  | 129909503 | 129909648 | 1 |
| 1480948 | <i>CPA2</i>  | chr7  | 129910527 | 129910633 | 1 |
| 1480945 | <i>CPA2</i>  | chr7  | 129912910 | 129913022 | 1 |
| 1480953 | <i>CPA2</i>  | chr7  | 129914983 | 129915092 | 1 |
| 1480950 | <i>CPA2</i>  | chr7  | 129916462 | 129916583 | 1 |
| 1480949 | <i>CPA2</i>  | chr7  | 129917660 | 129917761 | 1 |
| 1480952 | <i>CPA2</i>  | chr7  | 129919297 | 129919507 | 1 |
| 1480944 | <i>CPA2</i>  | chr7  | 129921938 | 129922033 | 1 |
| 1480943 | <i>CPA2</i>  | chr7  | 129929394 | 129929592 | 1 |
| 2059511 | <i>CPBI</i>  | chr3  | 148545605 | 148545686 | 2 |
| 2059518 | <i>CPBI</i>  | chr3  | 148545783 | 148545869 | 2 |
| 2059510 | <i>CPBI</i>  | chr3  | 148552279 | 148552414 | 1 |
| 2059512 | <i>CPBI</i>  | chr3  | 148558467 | 148558577 | 2 |
| 2059513 | <i>CPBI</i>  | chr3  | 148558655 | 148558767 | 2 |
| 2059517 | <i>CPBI</i>  | chr3  | 148559604 | 148559716 | 1 |
| 2059509 | <i>CPBI</i>  | chr3  | 148562259 | 148562380 | 2 |
| 2059519 | <i>CPBI</i>  | chr3  | 148562458 | 148562559 | 2 |
| 2059516 | <i>CPBI</i>  | chr3  | 148563205 | 148563418 | 1 |
| 2059514 | <i>CPBI</i>  | chr3  | 148575238 | 148575333 | 1 |
| 2059515 | <i>CPBI</i>  | chr3  | 148577596 | 148577794 | 1 |
| 961336  | <i>CTRB1</i> | chr16 | 75252900  | 75252962  | 1 |
| 961338  | <i>CTRB1</i> | chr16 | 75256660  | 75256774  | 2 |

|         |              |       |          |          |   |
|---------|--------------|-------|----------|----------|---|
| 961337  | <i>CTRB1</i> | chr16 | 75256861 | 75256951 | 1 |
| 961339  | <i>CTRB1</i> | chr16 | 75257033 | 75257122 | 2 |
| 961341  | <i>CTRB1</i> | chr16 | 75257340 | 75257531 | 2 |
| 961342  | <i>CTRB1</i> | chr16 | 75257947 | 75258091 | 1 |
| 961340  | <i>CTRB1</i> | chr16 | 75258597 | 75258769 | 1 |
| 1237203 | <i>CTRB2</i> | chr16 | 75238053 | 75238225 | 1 |
| 1237208 | <i>CTRB2</i> | chr16 | 75238665 | 75238809 | 2 |
| 1237206 | <i>CTRB2</i> | chr16 | 75239225 | 75239416 | 2 |
| 1237202 | <i>CTRB2</i> | chr16 | 75239634 | 75239723 | 2 |
| 1237205 | <i>CTRB2</i> | chr16 | 75239805 | 75239895 | 1 |
| 1237204 | <i>CTRB2</i> | chr16 | 75239982 | 75240096 | 2 |
| 1237207 | <i>CTRB2</i> | chr16 | 75240982 | 75241044 | 1 |
| 774602  | <i>CTRC</i>  | chr1  | 15764955 | 15765005 | 1 |
| 774603  | <i>CTRC</i>  | chr1  | 15766790 | 15766892 | 1 |
| 774601  | <i>CTRC</i>  | chr1  | 15766983 | 15767091 | 2 |
| 774600  | <i>CTRC</i>  | chr1  | 15768937 | 15769073 | 1 |
| 774599  | <i>CTRC</i>  | chr1  | 15769908 | 15770055 | 1 |
| 774604  | <i>CTRC</i>  | chr1  | 15771095 | 15771251 | 1 |
| 774598  | <i>CTRC</i>  | chr1  | 15772086 | 15772249 | 1 |
| 774605  | <i>CTRC</i>  | chr1  | 15773064 | 15773089 | 1 |
| 1141491 | <i>ERBB2</i> | chr17 | 37855807 | 37855845 | 1 |
| 438716  | <i>ERBB2</i> | chr17 | 37856486 | 37856569 | 1 |
| 438721  | <i>ERBB2</i> | chr17 | 37863254 | 37863399 | 1 |
| 438723  | <i>ERBB2</i> | chr17 | 37863237 | 37863399 | 1 |
| 438702  | <i>ERBB2</i> | chr17 | 37864568 | 37864792 | 1 |
| 438713  | <i>ERBB2</i> | chr17 | 37865565 | 37865710 | 1 |
| 438710  | <i>ERBB2</i> | chr17 | 37866060 | 37866139 | 1 |
| 438711  | <i>ERBB2</i> | chr17 | 37866333 | 37866459 | 1 |
| 438706  | <i>ERBB2</i> | chr17 | 37866587 | 37866739 | 1 |
| 438705  | <i>ERBB2</i> | chr17 | 37868175 | 37868305 | 1 |
| 438727  | <i>ERBB2</i> | chr17 | 37868569 | 37868706 | 1 |
| 438714  | <i>ERBB2</i> | chr17 | 37871533 | 37871617 | 2 |
| 438704  | <i>ERBB2</i> | chr17 | 37871693 | 37871794 | 2 |
| 438700  | <i>ERBB2</i> | chr17 | 37871987 | 37872197 | 1 |
| 438724  | <i>ERBB2</i> | chr17 | 37872548 | 37872691 | 2 |
| 438709  | <i>ERBB2</i> | chr17 | 37872762 | 37872863 | 2 |
| 438720  | <i>ERBB2</i> | chr17 | 37873567 | 37873738 | 1 |
| 1141493 | <i>ERBB2</i> | chr17 | 37873567 | 37873742 | 1 |
| 438718  | <i>ERBB2</i> | chr17 | 37876034 | 37876092 | 1 |
| 438708  | <i>ERBB2</i> | chr17 | 37879566 | 37879715 | 2 |
| 438703  | <i>ERBB2</i> | chr17 | 37879785 | 37879918 | 2 |

|         |              |       |          |          |   |
|---------|--------------|-------|----------|----------|---|
| 438701  | <i>ERBB2</i> | chr17 | 37880159 | 37880268 | 1 |
| 438715  | <i>ERBB2</i> | chr17 | 37880973 | 37881169 | 2 |
| 438712  | <i>ERBB2</i> | chr17 | 37881296 | 37881462 | 1 |
| 438722  | <i>ERBB2</i> | chr17 | 37881574 | 37881660 | 1 |
| 438717  | <i>ERBB2</i> | chr17 | 37881954 | 37882111 | 1 |
| 438726  | <i>ERBB2</i> | chr17 | 37882809 | 37882917 | 1 |
| 438707  | <i>ERBB2</i> | chr17 | 37883062 | 37883261 | 1 |
| 438719  | <i>ERBB2</i> | chr17 | 37883542 | 37883805 | 2 |
| 1141492 | <i>ERBB2</i> | chr17 | 37883936 | 37883955 | 2 |
| 438725  | <i>ERBB2</i> | chr17 | 37883936 | 37884302 | 3 |
| 438023  | <i>ERCC4</i> | chr16 | 14014017 | 14014234 | 2 |
| 438025  | <i>ERCC4</i> | chr16 | 14015882 | 14016073 | 1 |
| 438032  | <i>ERCC4</i> | chr16 | 14020412 | 14020618 | 1 |
| 438028  | <i>ERCC4</i> | chr16 | 14021879 | 14022097 | 2 |
| 438029  | <i>ERCC4</i> | chr16 | 14024561 | 14024752 | 2 |
| 438024  | <i>ERCC4</i> | chr16 | 14026008 | 14026147 | 1 |
| 438027  | <i>ERCC4</i> | chr16 | 14028043 | 14028164 | 1 |
| 438022  | <i>ERCC4</i> | chr16 | 14028997 | 14029605 | 2 |
| 438031  | <i>ERCC4</i> | chr16 | 14031617 | 14031720 | 1 |
| 438030  | <i>ERCC4</i> | chr16 | 14038574 | 14038697 | 1 |
| 438026  | <i>ERCC4</i> | chr16 | 14041465 | 14042209 | 3 |
| 426637  | <i>FANCA</i> | chr16 | 89805003 | 89805121 | 1 |
| 1163050 | <i>FANCA</i> | chr16 | 89805100 | 89805121 | 1 |
| 426655  | <i>FANCA</i> | chr16 | 89805284 | 89805387 | 1 |
| 426638  | <i>FANCA</i> | chr16 | 89805535 | 89805702 | 1 |
| 1163049 | <i>FANCA</i> | chr16 | 89805531 | 89805702 | 1 |
| 426639  | <i>FANCA</i> | chr16 | 89805880 | 89805966 | 1 |
| 426646  | <i>FANCA</i> | chr16 | 89806396 | 89806512 | 1 |
| 426668  | <i>FANCA</i> | chr16 | 89807206 | 89807279 | 1 |
| 426652  | <i>FANCA</i> | chr16 | 89809202 | 89809351 | 1 |
| 426635  | <i>FANCA</i> | chr16 | 89811361 | 89811484 | 1 |
| 426626  | <i>FANCA</i> | chr16 | 89812986 | 89813101 | 1 |
| 426629  | <i>FANCA</i> | chr16 | 89813233 | 89813303 | 1 |
| 426643  | <i>FANCA</i> | chr16 | 89815061 | 89815180 | 1 |
| 426628  | <i>FANCA</i> | chr16 | 89816132 | 89816315 | 2 |
| 426669  | <i>FANCA</i> | chr16 | 89818540 | 89818635 | 1 |
| 426632  | <i>FANCA</i> | chr16 | 89824979 | 89825118 | 1 |
| 426647  | <i>FANCA</i> | chr16 | 89828351 | 89828435 | 1 |
| 426636  | <i>FANCA</i> | chr16 | 89831292 | 89831479 | 2 |
| 426642  | <i>FANCA</i> | chr16 | 89833543 | 89833650 | 1 |
| 426645  | <i>FANCA</i> | chr16 | 89836239 | 89836437 | 1 |

|        |       |       |          |          |   |
|--------|-------|-------|----------|----------|---|
| 426648 | FANCA | chr16 | 89836568 | 89836672 | 1 |
| 426656 | FANCA | chr16 | 89836966 | 89837047 | 1 |
| 426664 | FANCA | chr16 | 89838080 | 89838227 | 1 |
| 426633 | FANCA | chr16 | 89839673 | 89839797 | 1 |
| 426653 | FANCA | chr16 | 89842144 | 89842228 | 1 |
| 426666 | FANCA | chr16 | 89845203 | 89845263 | 2 |
| 426667 | FANCA | chr16 | 89845345 | 89845416 | 2 |
| 426650 | FANCA | chr16 | 89846271 | 89846370 | 1 |
| 426649 | FANCA | chr16 | 89849261 | 89849331 | 2 |
| 426658 | FANCA | chr16 | 89849409 | 89849515 | 2 |
| 426663 | FANCA | chr16 | 89851256 | 89851377 | 1 |
| 426654 | FANCA | chr16 | 89857805 | 89857949 | 1 |
| 426630 | FANCA | chr16 | 89858329 | 89858481 | 2 |
| 426661 | FANCA | chr16 | 89858873 | 89858960 | 1 |
| 426634 | FANCA | chr16 | 89862308 | 89862431 | 1 |
| 426627 | FANCA | chr16 | 89865481 | 89865492 | 1 |
| 426662 | FANCA | chr16 | 89865568 | 89865645 | 1 |
| 426660 | FANCA | chr16 | 89866007 | 89866051 | 1 |
| 426641 | FANCA | chr16 | 89869661 | 89869754 | 1 |
| 426640 | FANCA | chr16 | 89871682 | 89871805 | 1 |
| 426657 | FANCA | chr16 | 89874696 | 89874780 | 1 |
| 426644 | FANCA | chr16 | 89877109 | 89877215 | 1 |
| 426665 | FANCA | chr16 | 89877331 | 89877484 | 1 |
| 426659 | FANCA | chr16 | 89880922 | 89881026 | 1 |
| 426631 | FANCA | chr16 | 89882279 | 89882399 | 1 |
| 426651 | FANCA | chr16 | 89882939 | 89883028 | 0 |
| 431076 | FANCC | chr9  | 97863983 | 97864137 | 1 |
| 431083 | FANCC | chr9  | 97869342 | 97869556 | 1 |
| 431089 | FANCC | chr9  | 97873472 | 97873632 | 1 |
| 431078 | FANCC | chr9  | 97873739 | 97873924 | 2 |
| 431075 | FANCC | chr9  | 97876905 | 97876997 | 1 |
| 431080 | FANCC | chr9  | 97879591 | 97879677 | 1 |
| 431077 | FANCC | chr9  | 97887362 | 97887472 | 1 |
| 431085 | FANCC | chr9  | 97888805 | 97888868 | 1 |
| 431079 | FANCC | chr9  | 97897622 | 97897789 | 1 |
| 431086 | FANCC | chr9  | 97912199 | 97912374 | 1 |
| 431088 | FANCC | chr9  | 97933355 | 97933430 | 1 |
| 431082 | FANCC | chr9  | 97934313 | 97934434 | 1 |
| 431087 | FANCC | chr9  | 98002925 | 98003030 | 1 |
| 431084 | FANCC | chr9  | 98009708 | 98009803 | 1 |
| 431081 | FANCC | chr9  | 98011403 | 98011578 | 1 |



|         |              |       |          |          |   |
|---------|--------------|-------|----------|----------|---|
| 430455  | <i>FANCG</i> | chr9  | 35074099 | 35074218 | 1 |
| 430450  | <i>FANCG</i> | chr9  | 35074362 | 35074496 | 1 |
| 430451  | <i>FANCG</i> | chr9  | 35074918 | 35075084 | 1 |
| 430449  | <i>FANCG</i> | chr9  | 35075270 | 35075327 | 2 |
| 430454  | <i>FANCG</i> | chr9  | 35075456 | 35075756 | 3 |
| 430453  | <i>FANCG</i> | chr9  | 35075953 | 35076030 | 1 |
| 430461  | <i>FANCG</i> | chr9  | 35076423 | 35076585 | 1 |
| 430459  | <i>FANCG</i> | chr9  | 35076715 | 35076872 | 1 |
| 430462  | <i>FANCG</i> | chr9  | 35076962 | 35077103 | 1 |
| 430458  | <i>FANCG</i> | chr9  | 35077255 | 35077401 | 1 |
| 430457  | <i>FANCG</i> | chr9  | 35078132 | 35078345 | 1 |
| 430452  | <i>FANCG</i> | chr9  | 35078596 | 35078738 | 1 |
| 430456  | <i>FANCG</i> | chr9  | 35079142 | 35079243 | 1 |
| 430460  | <i>FANCG</i> | chr9  | 35079432 | 35079526 | 1 |
| 437900  | <i>FANCL</i> | chr2  | 58386894 | 58386940 | 1 |
| 437903  | <i>FANCL</i> | chr2  | 58387237 | 58387319 | 1 |
| 437891  | <i>FANCL</i> | chr2  | 58388651 | 58388778 | 1 |
| 437901  | <i>FANCL</i> | chr2  | 58389995 | 58390087 | 2 |
| 437904  | <i>FANCL</i> | chr2  | 58390158 | 58390214 | 2 |
| 437893  | <i>FANCL</i> | chr2  | 58390563 | 58390657 | 1 |
| 437895  | <i>FANCL</i> | chr2  | 58392853 | 58393014 | 1 |
| 437894  | <i>FANCL</i> | chr2  | 58425708 | 58425802 | 1 |
| 437896  | <i>FANCL</i> | chr2  | 58425723 | 58425802 | 1 |
| 437902  | <i>FANCL</i> | chr2  | 58431259 | 58431366 | 1 |
| 437890  | <i>FANCL</i> | chr2  | 58449071 | 58449182 | 1 |
| 437897  | <i>FANCL</i> | chr2  | 58453857 | 58453924 | 1 |
| 437899  | <i>FANCL</i> | chr2  | 58456943 | 58457014 | 1 |
| 437898  | <i>FANCL</i> | chr2  | 58459183 | 58459252 | 1 |
| 437892  | <i>FANCL</i> | chr2  | 58468347 | 58468453 | 1 |
| 691778  | <i>GRP</i>   | chr18 | 56887492 | 56887641 | 1 |
| 691779  | <i>GRP</i>   | chr18 | 56892718 | 56892952 | 1 |
| 691783  | <i>GRP</i>   | chr18 | 56892718 | 56892971 | 1 |
| 691782  | <i>GRP</i>   | chr18 | 56897630 | 56897694 | 1 |
| 691780  | <i>GRP</i>   | chr18 | 56897651 | 56897705 | 1 |
| 691781  | <i>GRP</i>   | chr18 | 56897630 | 56897705 | 1 |
| 2493419 | <i>HNFB</i>  | chr17 | 36047277 | 36047400 | 1 |
| 439200  | <i>HNFB</i>  | chr17 | 36047369 | 36047400 | 1 |
| 439191  | <i>HNFB</i>  | chr17 | 36059076 | 36059205 | 1 |
| 439199  | <i>HNFB</i>  | chr17 | 36060982 | 36061187 | 1 |
| 439193  | <i>HNFB</i>  | chr17 | 36064918 | 36065061 | 1 |
| 439197  | <i>HNFB</i>  | chr17 | 36070505 | 36070676 | 1 |

|        |              |       |          |          |   |
|--------|--------------|-------|----------|----------|---|
| 439194 | <i>HNF1B</i> | chr17 | 36091580 | 36091826 | 1 |
| 439196 | <i>HNF1B</i> | chr17 | 36093544 | 36093741 | 1 |
| 439198 | <i>HNF1B</i> | chr17 | 36093544 | 36093819 | 1 |
| 439195 | <i>HNF1B</i> | chr17 | 36099425 | 36099635 | 1 |
| 439192 | <i>HNF1B</i> | chr17 | 36104526 | 36104880 | 2 |
| 607347 | <i>HNF4G</i> | chr8  | 76452222 | 76452320 | 1 |
| 607353 | <i>HNF4G</i> | chr8  | 76456040 | 76456219 | 1 |
| 607352 | <i>HNF4G</i> | chr8  | 76459816 | 76459921 | 2 |
| 607351 | <i>HNF4G</i> | chr8  | 76463617 | 76463734 | 1 |
| 607345 | <i>HNF4G</i> | chr8  | 76465271 | 76465437 | 1 |
| 607346 | <i>HNF4G</i> | chr8  | 76468211 | 76468309 | 1 |
| 607348 | <i>HNF4G</i> | chr8  | 76470747 | 76470910 | 2 |
| 607354 | <i>HNF4G</i> | chr8  | 76471030 | 76471277 | 2 |
| 607349 | <i>HNF4G</i> | chr8  | 76472573 | 76472706 | 1 |
| 607350 | <i>HNF4G</i> | chr8  | 76476204 | 76476336 | 1 |
| 742194 | <i>IDO2</i>  | chr8  | 39792710 | 39792742 | 1 |
| 742190 | <i>IDO2</i>  | chr8  | 39806662 | 39806788 | 1 |
| 742195 | <i>IDO2</i>  | chr8  | 39821121 | 39821227 | 1 |
| 742191 | <i>IDO2</i>  | chr8  | 39836580 | 39836710 | 1 |
| 742198 | <i>IDO2</i>  | chr8  | 39840165 | 39840294 | 1 |
| 742193 | <i>IDO2</i>  | chr8  | 39843021 | 39843046 | 1 |
| 742192 | <i>IDO2</i>  | chr8  | 39845384 | 39845494 | 1 |
| 742197 | <i>IDO2</i>  | chr8  | 39847234 | 39847362 | 1 |
| 742189 | <i>IDO2</i>  | chr8  | 39862840 | 39862902 | 1 |
| 742199 | <i>IDO2</i>  | chr8  | 39871078 | 39871237 | 1 |
| 742196 | <i>IDO2</i>  | chr8  | 39872760 | 39873126 | 2 |
| 427108 | <i>MLH1</i>  | chr3  | 37035033 | 37035159 | 1 |
| 252790 | <i>MLH1</i>  | chr3  | 37038104 | 37038205 | 1 |
| 427110 | <i>MLH1</i>  | chr3  | 37042522 | 37042544 | 1 |
| 427112 | <i>MLH1</i>  | chr3  | 37042440 | 37042549 | 1 |
| 427106 | <i>MLH1</i>  | chr3  | 37045886 | 37045970 | 1 |
| 427098 | <i>MLH1</i>  | chr3  | 37048476 | 37048559 | 1 |
| 427101 | <i>MLH1</i>  | chr3  | 37050299 | 37050401 | 1 |
| 427095 | <i>MLH1</i>  | chr3  | 37053305 | 37053358 | 1 |
| 427094 | <i>MLH1</i>  | chr3  | 37053496 | 37053595 | 1 |
| 427093 | <i>MLH1</i>  | chr3  | 37055917 | 37056040 | 1 |
| 427099 | <i>MLH1</i>  | chr3  | 37055963 | 37056040 | 1 |
| 427103 | <i>MLH1</i>  | chr3  | 37058991 | 37059095 | 1 |
| 427104 | <i>MLH1</i>  | chr3  | 37061795 | 37061959 | 1 |
| 427107 | <i>MLH1</i>  | chr3  | 37067122 | 37067503 | 2 |
| 427105 | <i>MLH1</i>  | chr3  | 37070269 | 37070428 | 1 |

|         |              |      |          |          |    |
|---------|--------------|------|----------|----------|----|
| 427109  | <i>MLH1</i>  | chr3 | 37081671 | 37081790 | 1  |
| 427096  | <i>MLH1</i>  | chr3 | 37083753 | 37083827 | 1  |
| 427100  | <i>MLH1</i>  | chr3 | 37089004 | 37089179 | 1  |
| 427102  | <i>MLH1</i>  | chr3 | 37090002 | 37090105 | 1  |
| 427097  | <i>MLH1</i>  | chr3 | 37090389 | 37090513 | 1  |
| 427111  | <i>MLH1</i>  | chr3 | 37091971 | 37092149 | 1  |
| 1146596 | <i>MSH2</i>  | chr2 | 47630523 | 47630546 | 1  |
| 426840  | <i>MSH2</i>  | chr2 | 47630325 | 47630546 | 2  |
| 426849  | <i>MSH2</i>  | chr2 | 47635534 | 47635699 | 1  |
| 426850  | <i>MSH2</i>  | chr2 | 47637227 | 47637516 | 1  |
| 426851  | <i>MSH2</i>  | chr2 | 47639547 | 47639704 | 2  |
| 426844  | <i>MSH2</i>  | chr2 | 47641402 | 47641562 | 1  |
| 426852  | <i>MSH2</i>  | chr2 | 47643429 | 47643573 | 1  |
| 426843  | <i>MSH2</i>  | chr2 | 47656875 | 47657085 | 2  |
| 426847  | <i>MSH2</i>  | chr2 | 47672681 | 47672801 | 1  |
| 426845  | <i>MSH2</i>  | chr2 | 47690164 | 47690298 | 2  |
| 426846  | <i>MSH2</i>  | chr2 | 47693791 | 47693952 | 2  |
| 426837  | <i>MSH2</i>  | chr2 | 47698098 | 47698206 | 1  |
| 426842  | <i>MSH2</i>  | chr2 | 47702158 | 47702414 | 2  |
| 426838  | <i>MSH2</i>  | chr2 | 47703500 | 47703715 | 1  |
| 426848  | <i>MSH2</i>  | chr2 | 47705405 | 47705663 | 1  |
| 426841  | <i>MSH2</i>  | chr2 | 47707829 | 47708015 | 1  |
| 426839  | <i>MSH2</i>  | chr2 | 47709912 | 47710093 | 1  |
| 1146597 | <i>MSH6</i>  | chr2 | 48010367 | 48010614 | 2  |
| 439820  | <i>MSH6</i>  | chr2 | 48010367 | 48010637 | 2  |
| 439811  | <i>MSH6</i>  | chr2 | 48018060 | 48018267 | 1  |
| 439815  | <i>MSH6</i>  | chr2 | 48023027 | 48023207 | 1  |
| 1146598 | <i>MSH6</i>  | chr2 | 48026023 | 48028299 | 9  |
| 439819  | <i>MSH6</i>  | chr2 | 48025744 | 48028299 | 10 |
| 439817  | <i>MSH6</i>  | chr2 | 48030553 | 48030829 | 2  |
| 439814  | <i>MSH6</i>  | chr2 | 48032043 | 48032171 | 1  |
| 439813  | <i>MSH6</i>  | chr2 | 48032751 | 48032851 | 2  |
| 439816  | <i>MSH6</i>  | chr2 | 48033337 | 48033502 | 1  |
| 439812  | <i>MSH6</i>  | chr2 | 48033585 | 48033795 | 1  |
| 439818  | <i>MSH6</i>  | chr2 | 48033912 | 48034004 | 1  |
| 2803135 | <i>NOC2L</i> | chr1 | 880068   | 880185   | 1  |
| 2803132 | <i>NOC2L</i> | chr1 | 880431   | 880531   | 1  |
| 2803140 | <i>NOC2L</i> | chr1 | 880892   | 881038   | 2  |
| 2803139 | <i>NOC2L</i> | chr1 | 881547   | 881671   | 1  |
| 2803131 | <i>NOC2L</i> | chr1 | 881776   | 881930   | 2  |
| 2803133 | <i>NOC2L</i> | chr1 | 883505   | 883617   | 1  |

|         |                |       |           |           |   |
|---------|----------------|-------|-----------|-----------|---|
| 2803137 | <i>NOC2L</i>   | chr1  | 883864    | 883988    | 1 |
| 2803136 | <i>NOC2L</i>   | chr1  | 886501    | 886623    | 1 |
| 2803129 | <i>NOC2L</i>   | chr1  | 887374    | 887524    | 1 |
| 2803144 | <i>NOC2L</i>   | chr1  | 887786    | 887985    | 2 |
| 2803146 | <i>NOC2L</i>   | chr1  | 888549    | 888673    | 1 |
| 2803130 | <i>NOC2L</i>   | chr1  | 889156    | 889277    | 1 |
| 2803142 | <i>NOC2L</i>   | chr1  | 889378    | 889467    | 1 |
| 2803128 | <i>NOC2L</i>   | chr1  | 891297    | 891398    | 2 |
| 2803134 | <i>NOC2L</i>   | chr1  | 891469    | 891600    | 1 |
| 2803141 | <i>NOC2L</i>   | chr1  | 892268    | 892410    | 2 |
| 2803145 | <i>NOC2L</i>   | chr1  | 892473    | 892658    | 1 |
| 2803143 | <i>NOC2L</i>   | chr1  | 894303    | 894466    | 2 |
| 2803138 | <i>NOC2L</i>   | chr1  | 894589    | 894625    | 1 |
| 423382  | <i>PALB2</i>   | chr16 | 23614774  | 23614995  | 1 |
| 423376  | <i>PALB2</i>   | chr16 | 23619179  | 23619338  | 1 |
| 423375  | <i>PALB2</i>   | chr16 | 23625319  | 23625417  | 1 |
| 423374  | <i>PALB2</i>   | chr16 | 23632677  | 23632804  | 1 |
| 423380  | <i>PALB2</i>   | chr16 | 23634284  | 23634456  | 1 |
| 423381  | <i>PALB2</i>   | chr16 | 23635324  | 23635420  | 1 |
| 423384  | <i>PALB2</i>   | chr16 | 23637551  | 23637723  | 1 |
| 423378  | <i>PALB2</i>   | chr16 | 23640519  | 23640601  | 1 |
| 423377  | <i>PALB2</i>   | chr16 | 23640955  | 23641795  | 3 |
| 423383  | <i>PALB2</i>   | chr16 | 23646177  | 23647660  | 6 |
| 423379  | <i>PALB2</i>   | chr16 | 23649165  | 23649278  | 1 |
| 423373  | <i>PALB2</i>   | chr16 | 23649385  | 23649455  | 1 |
| 423372  | <i>PALB2</i>   | chr16 | 23652425  | 23652483  | 1 |
| 2059500 | <i>PLA2G1B</i> | chr12 | 120759990 | 120760125 | 1 |
| 2059498 | <i>PLA2G1B</i> | chr12 | 120762731 | 120762869 | 1 |
| 2059497 | <i>PLA2G1B</i> | chr12 | 120763658 | 120763828 | 1 |
| 2059499 | <i>PLA2G1B</i> | chr12 | 120765517 | 120765561 | 1 |
| 440444  | <i>PMS2</i>    | chr7  | 6013024   | 6013178   | 1 |
| 440434  | <i>PMS2</i>    | chr7  | 6017213   | 6017393   | 1 |
| 440448  | <i>PMS2</i>    | chr7  | 6018221   | 6018332   | 1 |
| 440441  | <i>PMS2</i>    | chr7  | 6022449   | 6022627   | 1 |
| 440442  | <i>PMS2</i>    | chr7  | 6026384   | 6027256   | 3 |
| 440439  | <i>PMS2</i>    | chr7  | 6029425   | 6029591   | 1 |
| 440435  | <i>PMS2</i>    | chr7  | 6031598   | 6031693   | 1 |
| 440445  | <i>PMS2</i>    | chr7  | 6035159   | 6035269   | 1 |
| 440436  | <i>PMS2</i>    | chr7  | 6036951   | 6037059   | 1 |
| 440446  | <i>PMS2</i>    | chr7  | 6038733   | 6038911   | 1 |
| 440440  | <i>PMS2</i>    | chr7  | 6042078   | 6042272   | 2 |

|         |                 |       |           |           |   |
|---------|-----------------|-------|-----------|-----------|---|
| 440447  | <i>PMS2</i>     | chr7  | 6043315   | 6043428   | 1 |
| 440443  | <i>PMS2</i>     | chr7  | 6043597   | 6043694   | 1 |
| 440437  | <i>PMS2</i>     | chr7  | 6045517   | 6045667   | 2 |
| 440438  | <i>PMS2</i>     | chr7  | 6048622   | 6048655   | 1 |
| 1863828 | <i>PNLIP</i>    | chr10 | 118305599 | 118305655 | 1 |
| 1863827 | <i>PNLIP</i>    | chr10 | 118306800 | 118306965 | 1 |
| 1863835 | <i>PNLIP</i>    | chr10 | 118307866 | 118307999 | 1 |
| 1863834 | <i>PNLIP</i>    | chr10 | 118310604 | 118310749 | 1 |
| 1863824 | <i>PNLIP</i>    | chr10 | 118313233 | 118313355 | 1 |
| 1863833 | <i>PNLIP</i>    | chr10 | 118314684 | 118314814 | 1 |
| 1863829 | <i>PNLIP</i>    | chr10 | 118314894 | 118315024 | 2 |
| 1863826 | <i>PNLIP</i>    | chr10 | 118315506 | 118315635 | 1 |
| 1863831 | <i>PNLIP</i>    | chr10 | 118318660 | 118318800 | 1 |
| 1863832 | <i>PNLIP</i>    | chr10 | 118319922 | 118320041 | 1 |
| 1863830 | <i>PNLIP</i>    | chr10 | 118320978 | 118321153 | 1 |
| 1863825 | <i>PNLIP</i>    | chr10 | 118327241 | 118327315 | 1 |
| 2059536 | <i>PNLIPRP2</i> | chr10 | 118380482 | 118380495 | 1 |
| 1491410 | <i>PNLIPRP2</i> | chr10 | 118380812 | 118380871 | 1 |
| 1491405 | <i>PNLIPRP2</i> | chr10 | 118383451 | 118383615 | 1 |
| 1491415 | <i>PNLIPRP2</i> | chr10 | 118385451 | 118385587 | 1 |
| 1491407 | <i>PNLIPRP2</i> | chr10 | 118386369 | 118386514 | 1 |
| 1491409 | <i>PNLIPRP2</i> | chr10 | 118387268 | 118387390 | 1 |
| 1491411 | <i>PNLIPRP2</i> | chr10 | 118389448 | 118389578 | 1 |
| 1491413 | <i>PNLIPRP2</i> | chr10 | 118390743 | 118390873 | 1 |
| 1491412 | <i>PNLIPRP2</i> | chr10 | 118394346 | 118394475 | 1 |
| 1491403 | <i>PNLIPRP2</i> | chr10 | 118396290 | 118396430 | 1 |
| 1491404 | <i>PNLIPRP2</i> | chr10 | 118397874 | 118397996 | 1 |
| 1491406 | <i>PNLIPRP2</i> | chr10 | 118401620 | 118401798 | 1 |
| 2059537 | <i>PNLIPRP2</i> | chr10 | 118404539 | 118404613 | 1 |
| 472301  | <i>PRSSI</i>    | chr7  | 142457330 | 142457380 | 1 |
| 472300  | <i>PRSSI</i>    | chr7  | 142458400 | 142458570 | 2 |
| 472297  | <i>PRSSI</i>    | chr7  | 142459619 | 142459883 | 2 |
| 472298  | <i>PRSSI</i>    | chr7  | 142460276 | 142460423 | 1 |
| 472299  | <i>PRSSI</i>    | chr7  | 142460713 | 142460876 | 1 |
| 529716  | <i>RAD51B</i>   | chr14 | 68290255  | 68290349  | 1 |
| 529712  | <i>RAD51B</i>   | chr14 | 68292175  | 68292299  | 1 |
| 529708  | <i>RAD51B</i>   | chr14 | 68301791  | 68301918  | 1 |
| 529715  | <i>RAD51B</i>   | chr14 | 68331714  | 68331861  | 1 |
| 529710  | <i>RAD51B</i>   | chr14 | 68352580  | 68352710  | 1 |
| 529711  | <i>RAD51B</i>   | chr14 | 68353732  | 68353926  | 2 |
| 529714  | <i>RAD51B</i>   | chr14 | 68758595  | 68758702  | 1 |

|         |               |       |           |           |   |
|---------|---------------|-------|-----------|-----------|---|
| 529718  | <i>RAD51B</i> | chr14 | 68878135  | 68878249  | 1 |
| 529717  | <i>RAD51B</i> | chr14 | 68934883  | 68934972  | 1 |
| 529709  | <i>RAD51B</i> | chr14 | 68944359  | 68944386  | 1 |
| 529707  | <i>RAD51B</i> | chr14 | 68963835  | 68963862  | 1 |
| 529713  | <i>RAD51B</i> | chr14 | 69061196  | 69061325  | 1 |
| 433487  | <i>RAD51C</i> | chr17 | 56769999  | 56770154  | 2 |
| 433482  | <i>RAD51C</i> | chr17 | 56772286  | 56772555  | 2 |
| 433483  | <i>RAD51C</i> | chr17 | 56772286  | 56772559  | 2 |
| 433485  | <i>RAD51C</i> | chr17 | 56774048  | 56774225  | 1 |
| 433486  | <i>RAD51C</i> | chr17 | 56780551  | 56780695  | 1 |
| 433489  | <i>RAD51C</i> | chr17 | 56787214  | 56787356  | 1 |
| 433484  | <i>RAD51C</i> | chr17 | 56798101  | 56798178  | 1 |
| 433481  | <i>RAD51C</i> | chr17 | 56801395  | 56801466  | 1 |
| 433480  | <i>RAD51C</i> | chr17 | 56809839  | 56809910  | 1 |
| 433488  | <i>RAD51C</i> | chr17 | 56811473  | 56811588  | 1 |
| 439584  | <i>RAD51D</i> | chr17 | 33427966  | 33428060  | 1 |
| 439588  | <i>RAD51D</i> | chr17 | 33428214  | 33428389  | 1 |
| 439586  | <i>RAD51D</i> | chr17 | 33430267  | 33430348  | 1 |
| 439587  | <i>RAD51D</i> | chr17 | 33430467  | 33430568  | 1 |
| 439580  | <i>RAD51D</i> | chr17 | 33433399  | 33433505  | 1 |
| 439583  | <i>RAD51D</i> | chr17 | 33434001  | 33434146  | 1 |
| 439579  | <i>RAD51D</i> | chr17 | 33434379  | 33434471  | 1 |
| 439582  | <i>RAD51D</i> | chr17 | 33443872  | 33444061  | 1 |
| 439581  | <i>RAD51D</i> | chr17 | 33445514  | 33445643  | 1 |
| 439585  | <i>RAD51D</i> | chr17 | 33446124  | 33446196  | 1 |
| 439578  | <i>RAD51D</i> | chr17 | 33446545  | 33446637  | 2 |
| 525756  | <i>RECQL4</i> | chr8  | 145736808 | 145736943 | 2 |
| 525752  | <i>RECQL4</i> | chr8  | 145737058 | 145737177 | 1 |
| 525748  | <i>RECQL4</i> | chr8  | 145737288 | 145737455 | 1 |
| 525746  | <i>RECQL4</i> | chr8  | 145737521 | 145737712 | 3 |
| 525758  | <i>RECQL4</i> | chr8  | 145737769 | 145737949 | 1 |
| 525765  | <i>RECQL4</i> | chr8  | 145738019 | 145738159 | 1 |
| 525753  | <i>RECQL4</i> | chr8  | 145738224 | 145738526 | 2 |
| 1181003 | <i>RECQL4</i> | chr8  | 145738595 | 145738772 | 1 |
| 1181004 | <i>RECQL4</i> | chr8  | 145738763 | 145738869 | 2 |
| 525763  | <i>RECQL4</i> | chr8  | 145738949 | 145739101 | 2 |
| 525761  | <i>RECQL4</i> | chr8  | 145739306 | 145739496 | 2 |
| 525750  | <i>RECQL4</i> | chr8  | 145739567 | 145739751 | 2 |
| 525745  | <i>RECQL4</i> | chr8  | 145739820 | 145739914 | 2 |
| 525760  | <i>RECQL4</i> | chr8  | 145740314 | 145740461 | 2 |
| 525754  | <i>RECQL4</i> | chr8  | 145740528 | 145740631 | 2 |

|         |               |       |           |           |   |
|---------|---------------|-------|-----------|-----------|---|
| 525749  | <i>RECQL4</i> | chr8  | 145740704 | 145740846 | 1 |
| 525755  | <i>RECQL4</i> | chr8  | 145741142 | 145741279 | 2 |
| 525751  | <i>RECQL4</i> | chr8  | 145741366 | 145742153 | 4 |
| 525747  | <i>RECQL4</i> | chr8  | 145742428 | 145742579 | 1 |
| 525762  | <i>RECQL4</i> | chr8  | 145742792 | 145742897 | 2 |
| 525759  | <i>RECQL4</i> | chr8  | 145742980 | 145743024 | 2 |
| 525757  | <i>RECQL4</i> | chr8  | 145743079 | 145743173 | 1 |
| 1060947 | <i>REG1A</i>  | chr2  | 79347982  | 79348056  | 1 |
| 1060948 | <i>REG1A</i>  | chr2  | 79348682  | 79348811  | 1 |
| 1060951 | <i>REG1A</i>  | chr2  | 79349108  | 79349256  | 1 |
| 1060950 | <i>REG1A</i>  | chr2  | 79349961  | 79350083  | 1 |
| 1060949 | <i>REG1A</i>  | chr2  | 79350268  | 79350346  | 1 |
| 443179  | <i>RNF43</i>  | chr17 | 56432298  | 56432352  | 1 |
| 436409  | <i>RNF43</i>  | chr17 | 56434823  | 56436189  | 6 |
| 436408  | <i>RNF43</i>  | chr17 | 56437504  | 56437617  | 1 |
| 436406  | <i>RNF43</i>  | chr17 | 56438138  | 56438310  | 1 |
| 436402  | <i>RNF43</i>  | chr17 | 56439899  | 56440014  | 1 |
| 436404  | <i>RNF43</i>  | chr17 | 56440630  | 56440772  | 2 |
| 2503706 | <i>RNF43</i>  | chr17 | 56440881  | 56440960  | 1 |
| 436401  | <i>RNF43</i>  | chr17 | 56440881  | 56440966  | 1 |
| 436410  | <i>RNF43</i>  | chr17 | 56448266  | 56448399  | 1 |
| 443178  | <i>RNF43</i>  | chr17 | 56492681  | 56492943  | 1 |
| 472305  | <i>SPINK1</i> | chr5  | 147204218 | 147204274 | 1 |
| 472302  | <i>SPINK1</i> | chr5  | 147207579 | 147207696 | 1 |
| 472304  | <i>SPINK1</i> | chr5  | 147209156 | 147209198 | 1 |
| 472303  | <i>SPINK1</i> | chr5  | 147211080 | 147211145 | 1 |
| 435833  | <i>STK11</i>  | chr19 | 1206907   | 1207207   | 2 |
| 433376  | <i>STK11</i>  | chr19 | 1218410   | 1218504   | 1 |
| 433377  | <i>STK11</i>  | chr19 | 1219317   | 1219417   | 1 |
| 433378  | <i>STK11</i>  | chr19 | 1220366   | 1220509   | 2 |
| 433370  | <i>STK11</i>  | chr19 | 1220574   | 1220721   | 2 |
| 433371  | <i>STK11</i>  | chr19 | 1221206   | 1221344   | 1 |
| 433375  | <i>STK11</i>  | chr19 | 1221942   | 1222010   | 2 |
| 433372  | <i>STK11</i>  | chr19 | 1222978   | 1223176   | 2 |
| 435834  | <i>STK11</i>  | chr19 | 1226447   | 1226651   | 2 |
| 434161  | <i>TERT</i>   | chr5  | 1253837   | 1253951   | 1 |
| 434171  | <i>TERT</i>   | chr5  | 1254477   | 1254625   | 1 |
| 434168  | <i>TERT</i>   | chr5  | 1255396   | 1255531   | 1 |
| 434165  | <i>TERT</i>   | chr5  | 1258707   | 1258779   | 1 |
| 434170  | <i>TERT</i>   | chr5  | 1260583   | 1260720   | 1 |
| 434173  | <i>TERT</i>   | chr5  | 1264513   | 1264712   | 2 |

|         |             |       |          |          |   |
|---------|-------------|-------|----------|----------|---|
| 434172  | <i>TERT</i> | chr5  | 1266573  | 1266655  | 2 |
| 434159  | <i>TERT</i> | chr5  | 1268629  | 1268753  | 1 |
| 434163  | <i>TERT</i> | chr5  | 1271228  | 1271324  | 1 |
| 434167  | <i>TERT</i> | chr5  | 1272294  | 1272400  | 1 |
| 434166  | <i>TERT</i> | chr5  | 1278750  | 1278916  | 1 |
| 434160  | <i>TERT</i> | chr5  | 1279400  | 1279590  | 1 |
| 434169  | <i>TERT</i> | chr5  | 1280267  | 1280458  | 2 |
| 434164  | <i>TERT</i> | chr5  | 1282538  | 1282744  | 1 |
| 434162  | <i>TERT</i> | chr5  | 1293422  | 1294786  | 6 |
| 434158  | <i>TERT</i> | chr5  | 1294880  | 1295109  | 0 |
| 2299745 | <i>TNS3</i> | chr7  | 47317668 | 47317823 | 1 |
| 2299737 | <i>TNS3</i> | chr7  | 47319756 | 47319793 | 1 |
| 2299729 | <i>TNS3</i> | chr7  | 47319878 | 47319957 | 1 |
| 2299728 | <i>TNS3</i> | chr7  | 47323289 | 47323468 | 1 |
| 2299739 | <i>TNS3</i> | chr7  | 47331547 | 47331635 | 1 |
| 2299736 | <i>TNS3</i> | chr7  | 47332420 | 47332508 | 1 |
| 2299723 | <i>TNS3</i> | chr7  | 47333325 | 47333431 | 1 |
| 2299735 | <i>TNS3</i> | chr7  | 47336674 | 47336816 | 1 |
| 2299726 | <i>TNS3</i> | chr7  | 47341778 | 47341875 | 1 |
| 2299740 | <i>TNS3</i> | chr7  | 47342542 | 47343187 | 3 |
| 2299731 | <i>TNS3</i> | chr7  | 47344424 | 47344606 | 1 |
| 2299727 | <i>TNS3</i> | chr7  | 47384347 | 47384441 | 1 |
| 2299744 | <i>TNS3</i> | chr7  | 47384516 | 47384641 | 2 |
| 2299742 | <i>TNS3</i> | chr7  | 47385779 | 47385959 | 1 |
| 2299738 | <i>TNS3</i> | chr7  | 47407956 | 47409223 | 5 |
| 2299732 | <i>TNS3</i> | chr7  | 47436391 | 47436506 | 1 |
| 2299748 | <i>TNS3</i> | chr7  | 47439984 | 47440060 | 1 |
| 2299734 | <i>TNS3</i> | chr7  | 47440376 | 47440516 | 1 |
| 2299725 | <i>TNS3</i> | chr7  | 47451319 | 47451405 | 1 |
| 2299730 | <i>TNS3</i> | chr7  | 47453529 | 47453600 | 1 |
| 2299743 | <i>TNS3</i> | chr7  | 47454686 | 47454809 | 1 |
| 2299741 | <i>TNS3</i> | chr7  | 47463693 | 47463787 | 1 |
| 2299733 | <i>TNS3</i> | chr7  | 47467904 | 47467979 | 1 |
| 2299724 | <i>TNS3</i> | chr7  | 47474874 | 47475007 | 1 |
| 2299747 | <i>TNS3</i> | chr7  | 47476855 | 47476916 | 1 |
| 2299746 | <i>TNS3</i> | chr7  | 47479079 | 47479239 | 1 |
| 423072  | <i>TP53</i> | chr17 | 7572921  | 7573013  | 1 |
| 423062  | <i>TP53</i> | chr17 | 7573921  | 7574038  | 1 |
| 423065  | <i>TP53</i> | chr17 | 7576531  | 7576589  | 2 |
| 423074  | <i>TP53</i> | chr17 | 7576619  | 7576662  | 2 |
| 423064  | <i>TP53</i> | chr17 | 7576847  | 7576931  | 1 |



|         |              |       |           |           |   |
|---------|--------------|-------|-----------|-----------|---|
| 423068  | <i>TP53</i>  | chr17 | 7577013   | 7577160   | 2 |
| 423069  | <i>TP53</i>  | chr17 | 7577493   | 7577613   | 1 |
| 423063  | <i>TP53</i>  | chr17 | 7578171   | 7578294   | 2 |
| 1137157 | <i>TP53</i>  | chr17 | 7578365   | 7578457   | 2 |
| 423071  | <i>TP53</i>  | chr17 | 7578365   | 7578538   | 2 |
| 423066  | <i>TP53</i>  | chr17 | 7578365   | 7578559   | 2 |
| 1137158 | <i>TP53</i>  | chr17 | 7579306   | 7579574   | 2 |
| 423067  | <i>TP53</i>  | chr17 | 7579306   | 7579595   | 2 |
| 423073  | <i>TP53</i>  | chr17 | 7579694   | 7579726   | 1 |
| 423070  | <i>TP53</i>  | chr17 | 7579833   | 7579917   | 2 |
| 1126651 | <i>TRYP2</i> | chr5  | 54320145  | 54320219  | 1 |
| 1126650 | <i>TRYP2</i> | chr5  | 54320482  | 54320640  | 1 |
| 1126652 | <i>TRYP2</i> | chr5  | 54326256  | 54326417  | 1 |
| 1126649 | <i>TRYP2</i> | chr5  | 54327186  | 54327466  | 1 |
| 1126653 | <i>TRYP2</i> | chr5  | 54329587  | 54329759  | 1 |
| 677370  | <i>WEE1</i>  | chr11 | 9595475   | 9596061   | 3 |
| 677371  | <i>WEE1</i>  | chr11 | 9597429   | 9597645   | 2 |
| 677369  | <i>WEE1</i>  | chr11 | 9597495   | 9597645   | 2 |
| 677373  | <i>WEE1</i>  | chr11 | 9597771   | 9597845   | 1 |
| 677376  | <i>WEE1</i>  | chr11 | 9598028   | 9598211   | 1 |
| 677368  | <i>WEE1</i>  | chr11 | 9598683   | 9598815   | 1 |
| 677375  | <i>WEE1</i>  | chr11 | 9603073   | 9603230   | 1 |
| 677377  | <i>WEE1</i>  | chr11 | 9606799   | 9606905   | 2 |
| 677366  | <i>WEE1</i>  | chr11 | 9606983   | 9607079   | 2 |
| 677372  | <i>WEE1</i>  | chr11 | 9607990   | 9608171   | 2 |
| 677367  | <i>WEE1</i>  | chr11 | 9608252   | 9608408   | 1 |
| 677374  | <i>WEE1</i>  | chr11 | 9609990   | 9610154   | 1 |
| 437093  | <i>XRCC2</i> | chr7  | 152345721 | 152346453 | 3 |
| 437094  | <i>XRCC2</i> | chr7  | 152357780 | 152357872 | 1 |
| 437092  | <i>XRCC2</i> | chr7  | 152373120 | 152373169 | 1 |
| 518936  | <i>XRCC3</i> | chr14 | 104165129 | 104165359 | 2 |
| 517931  | <i>XRCC3</i> | chr14 | 104165464 | 104165521 | 1 |
| 517932  | <i>XRCC3</i> | chr14 | 104165695 | 104165918 | 1 |
| 517926  | <i>XRCC3</i> | chr14 | 104169504 | 104169669 | 1 |
| 517925  | <i>XRCC3</i> | chr14 | 104173334 | 104173557 | 1 |
| 517924  | <i>XRCC3</i> | chr14 | 104174853 | 104175001 | 1 |
| 518935  | <i>XRCC3</i> | chr14 | 104177364 | 104177429 | 1 |

| <b>eTable 2. Primers for Sanger Sequencing.</b> |                        |                      |
|-------------------------------------------------|------------------------|----------------------|
| <b>Primer ID</b>                                | <b>Sequences</b>       | <b>Target length</b> |
| P101-chr15-40494810-F                           | GCATTTACTCCTAGAGTATG   | 524                  |
| P101-chr15-40494810-R                           | GCTATCCTAGAGGATATAAAG  |                      |
| P102-chr5-147207583-F                           | ACACAATCATTGCAACCAC    | 526                  |
| P102-chr5-147207583-R                           | ACACACAGTATCATTCTCCC   |                      |
| P103-chr2-48033916-F                            | GCTTGTCCTAAAAGCTATG    | 380                  |
| P103-chr2-48033916-R                            | TACCACCTTTGTCAGAAGTC   |                      |
| P104-chr2-48033498-F                            | ATTTGATGGGACGGCAATAGC  | 373                  |
| P104-chr2-48033498-R                            | TTGAATAACTTCCTCTGGG    |                      |
| P105-chr13-32944538-F                           | GCATTAAGAACTTGTAGCAG   | 475                  |
| P105-chr13-32944538-R                           | GAGACCGAACTCCATCTC     |                      |
| P106-chr7-117120191-F                           | AATGACATCACAGCAGGTC    | 405                  |
| P106-chr7-117120191-R                           | TCAGTTGCAAGTAGATGTGGC  |                      |
| P107-chr2-47639648-F                            | CATCATATCAGTGTCTTGCAC  | 423                  |
| P107-chr2-47639648-R                            | GATACACAGTTTAGGTTTTGAG |                      |
| P108-chr17-7577545-F                            | GAAGCCACAGGTTAAGAGGTC  | 337                  |
| P108-chr17-7577545-R                            | CATCTTGGGCCTGTGTTATC   |                      |
| P109-chr2-47641557-F                            | AACTGGATCCAGTGGTATAG   | 449                  |
| P109-chr2-47641557-R                            | ATTGTGCCACTGCACTCTG    |                      |
| P110-chr2-47641559-F                            | CTGGATCCAGTGGTATAG     | 350                  |
| P110-chr2-47641559-R                            | GCCATTTAAAGCTAGTTATC   |                      |
| P111-chr2-47643505-F                            | ATGTACAGTTGAACATACGG   | 445                  |
| P111-chr2-47643505-R                            | CTCTATTACTATGTACTCTG   |                      |
| P112-chr3-37048546-F                            | CTCATTAGAGCAAGTTACTCAG | 471                  |
| P112-chr3-37048546-R                            | TGCTTCATTTGACAGATGAG   |                      |
| P113-chr3-37053348-F                            | TCCATGAAGTTTCTGCTGG    | 477                  |
| P113-chr3-37053348-R                            | GACATACCGACTAACAGC     |                      |
| P114-chr13-32913522-F                           | GAGACCATTGAGATCACAGC   | 583                  |
| P114-chr13-32913522-R                           | CTGGCTCAATACCAGAATC    |                      |
| P115-chr17-41245586-F                           | CTTGGAAGGCTAGGATTGAC   | 567                  |
| P115-chr17-41245586-R                           | GGAGCAGAATGGTCAAGTGATG |                      |
| P116-chr11-108172425-F                          | CTGAATGACTAGTGAAAGTCC  | 477                  |
| P116-chr11-108172425-R                          | CACATTCCTGGATTTATG     |                      |
| P117-chr7-117267766-F                           | GTGAAATTGTCTGCCATTC    | 494                  |
| P117-chr7-117267766-R                           | ATAGGTTCAAGACTCTGC     |                      |
| P118-chr13-32914069-F                           | AGATGCAAATGCATACCCAC   | 537                  |
| P118-chr13-32914069-R                           | GTATTTGCAGATGAGACTGAC  |                      |
| P119-chr17-41245693-F                           | GAAAGTATCGCTGTCATGTC   | 485                  |
| P119-chr17-41245693-R                           | CTAACCAAACGGAGCAGAATG  |                      |
| P120-chr13-32907465-F                           | TCAGGTCATATGACTGATCC   | 533                  |

|                        |                         |     |
|------------------------|-------------------------|-----|
| P120-chr13-32907465-R  | CTACCATGTTTGAGTGACC     |     |
| P121-chr13-32954022-F  | ACTACTAATGCCACAAAGAG    | 629 |
| P121-chr13-32954022-R  | CAGATCACTAGTTAGCTAGC    |     |
| P122-chr3-37067242-F   | ATACAGACTTTGCTACCAGG    | 470 |
| P122-chr3-37067242-R   | GAAGATGCAAGTGATTCATG    |     |
| P123-chr11-108186639-F | CATTTAGAGTTGGGAGTTAC    | 446 |
| P123-chr11-108186639-R | CAGCACTACACTAGTGATGGC   |     |
| P124-chr3-37067157-F   | TCGGGCAGAATTGCTTCTATAAC | 465 |
| P124-chr3-37067157-R   | CTCTGATTTTTGGCAGCCAC    |     |
| P125-chr16-23619181-F  | ACAGGCATGATCCACCATGTG   | 585 |
| P125-chr16-23619181-R  | CAAGCCAGTGGTTAAATCCTG   |     |
| P126-chr17-41203122-F  | CATTTTCAGCAATCTGAGGAAC  | 498 |
| P126-chr17-41203122-R  | CAAGTTAAAGCACCTGCAGAG   |     |
| P127-chr13-32907371-F  | CTTGAATCTCATACTAGACTGC  | 620 |
| P127-chr13-32907371-R  | TCATGTATACAGATGATGCC    |     |
| P128-chr2-47643481-F   | CAATAGAGTCAGACCCTGTCTC  | 445 |
| P128-chr2-47643481-R   | ATCATGTGGGTAAGTGCAGG    |     |
| P129-chr9-98002937-F   | CTCAACATTAGGTCTTCATCC   | 541 |
| P129-chr9-98002937-R   | GAGAGCAAAGATAGAGTGAG    |     |
| P130-chr2-48030691-F   | GTGCCTGGCTAACTATAGTCG   | 372 |
| P130-chr2-48030691-R   | CCTATTAAGTCACTGGCTG     |     |
| P131-chr17-41245927-F  | CTGCTGCTTATAGGTTTCAG    | 478 |
| P131-chr17-41245927-R  | TACTGGCCAGTGATCCTCATGAG |     |
| P132-chr16-89866028-F  | ATTCCAGTACCAGGACTCTG    | 447 |
| P132-chr16-89866028-R  | GGTTCACGCCATTCTCCTG     |     |
| P133-chr13-32912195-F  | GACCACTTCTGAGGAATGCAG   | 536 |
| P133-chr13-32912195-R  | GAGAATTTCTACTGGCAGCAG   |     |
| P134-chr17-41215382-F  | AGGTATGAGCCACAGTGCAG    | 392 |
| P134-chr17-41215382-R  | TCAACTCTGTCTCCAGAAG     |     |
| P135-chr17-33428225-F  | CAATGTCTACCATCTCCTGG    | 506 |
| P135-chr17-33428225-R  | GTTCCAGACCTGCCATTAGG    |     |
| P136-chr9-97897639-F   | GCATGCTCCAAGGATGCAG     | 474 |
| P136-chr9-97897639-R   | TAGCCACTGCTGTGACCATG    |     |
| P137-chr5-147204265-F  | CAACAATAAGGCCAGTCAGGC   | 438 |
| P137-chr5-147204265-R  | GAAGGCAGAGGCATCAGGAG    |     |
| P138-chr7-117251704-F  | ATTTACAGGCAGGAGTCC      | 318 |
| P138-chr7-117251704-R  | GATAACCTATAGAATGCAGC    |     |
| P139-chr17-41197809-F  | CTGCAGTCAGTAGTGGCTG     | 248 |
| P139-chr17-41197809-R  | GCTTCTACCTCATTAATCC     |     |
| P140-chr17-41246618-F  | CCAAGGAACATCTTCAGTATCTC | 379 |
| P140-chr17-41246618-R  | GAACACCACTGAGAAGCGTG    |     |

|                        |                        |     |
|------------------------|------------------------|-----|
| P141-chr13-32907029-F  | GTGAATGGTCTCAACTAACC   | 479 |
| P141-chr13-32907029-R  | GGAGTCCTCCTTCTGTGAG    |     |
| P142-chr17-41219625-F  | CTCACGAGTAGCTGGGACTAC  | 432 |
| P142-chr17-41219625-R  | GAACGTGCAGGATTGCTAC    |     |
| P143-chr17-41244218-F  | GGCTAGGACTCCTGCTAAG    | 513 |
| P143-chr17-41244218-R  | GTACAGTGAGCACAATTAG    |     |
| P144-chr7-117246728-F  | GAATGCGTCTACTGTGATCC   | 401 |
| P144-chr7-117246728-R  | AATGTGGGATTGCCTCAGG    |     |
| P145-chr16-23614914-F  | CAAGATCAGTGGTGCTACC    | 389 |
| P145-chr16-23614914-R  | GTATGCTATCAGGTTCCCTGG  |     |
| P146-chr7-117149143-F  | CAGAGCATTGAATTCTGCC    | 526 |
| P146-chr7-117149143-R  | GCTGAGCCCATTGAGATTG    |     |
| P147-chr2-47641545-F   | ACTGGATCCAGTGGTATAG    | 451 |
| P147-chr2-47641545-R   | GAGATTGTGCCACTGCACTCTG |     |
| P148-chr13-32907420-F  | CAGGTCATATGACTGATCC    | 349 |
| P148-chr13-32907420-R  | CCTGAATCAGCATTGCAAATG  |     |
| P149-chr13-32921033-F  | GCATCTGTTACATTCCTG     | 446 |
| P149-chr13-32921033-R  | CTCAACCTTAGTACTTCATCC  |     |
| P150-chr16-23646660-F  | CCTAATTTCACTTTGGTCAG   | 320 |
| P150-chr16-23646660-R  | CCAGTGACACTCTTGATG     |     |
| P151-chr13-32929248-F  | CAACTAAGGAACGTCAAGAG   | 393 |
| P151-chr13-32929248-R  | CAGCTACTGCTTGATTGGAG   |     |
| P152-chr16-23641306-F  | AGTCACAGTCACAGGTAGG    | 391 |
| P152-chr16-23641306-R  | GACCTTATTGTTCTACCAG    |     |
| P153-chr9-98002929-F   | GTCTTCATCCTAAAGACTGG   | 504 |
| P153-chr9-98002929-R   | TATCCCATCAGCAGAAAGAG   |     |
| P154-chr17-33430317-F  | TATGGTGCAAAGCTGTAGCTG  | 442 |
| P154-chr17-33430317-R  | AGGTGACTGGTTCTTCAGG    |     |
| P155-chr13-32912337-F  | CGGAAGTTTGCTGGCCTGTTG  | 425 |
| P155-chr13-32912337-R  | GAATTTCTACTGGCAGCAG    |     |
| P156-chr17-41246508-F  | CATCACTTCTGGAAAACCACTC | 376 |
| P156-chr17-41246508-R  | GTTTCAAACCTGCATGTGGAG  |     |
| P157-chr7-117175335-F  | GGAAAACCGATTCTATGTG    | 474 |
| P157-chr7-117175335-R  | GACACTGAAGATCACTGTTC   |     |
| P158-chr7-117232266-F  | CCAAAATCTACAGCCAGAC    | 419 |
| P158-chr7-117232266-R  | TCAGGTTTCAGGACAGACTG   |     |
| P159-chr11-108216476-F | CCAGACTGTTAGCTTCTTG    | 443 |
| P159-chr11-108216476-R | GATGGGTTGGTTACTAACCAC  |     |
| P160-chr17-41215387-F  | GCATTGTTAAGGAAAGTGG    | 385 |
| P160-chr17-41215387-R  | TAATAGTCGGCAGGAATCC    |     |
| P161-chr13-32913422-F  | GACCATTGAGATCACAGCTG   | 508 |

|                        |                          |     |
|------------------------|--------------------------|-----|
| P161-chr13-32913422-R  | GGAATAGCTGTTAGACATGC     |     |
| P162-chr17-41245390-F  | CGAGATACTTTCTGAGTGCC     | 390 |
| P162-chr17-41245390-R  | TACAACCAAATGCCAGTCAGG    |     |
| P163-chr13-32900280-F  | GATTACAGGCGTGAACCACTG    | 583 |
| P163-chr13-32900280-R  | TATGAGGCAGAATGCTAGG      |     |
| P164-chr16-68835596-F  | AATCAGAGCACAAAGGAAGTC    | 371 |
| P164-chr16-68835596-R  | GGTGGAAAACCTTCTGTAGG     |     |
| P165-chr13-32914102-F  | GAGGAACTTGTGACTAGCTC     | 529 |
| P165-chr13-32914102-R  | GGACAGATTTTCCACTTGCTGTGC |     |
| P166-chr13-32914790-F  | GTACAGCAAGTGGAAAGCAAG    | 507 |
| P166-chr13-32914790-R  | CTGCTTCTGTTCAAAGTAG      |     |
| P167-chr11-108175459-F | TACTCAAACCTATTGGGTGG     | 446 |
| P167-chr11-108175459-R | CTGAGGGAATACTATACATC     |     |
| P168-chr13-32914522-F  | CATAAGTCAGTCTCATCTGC     | 384 |
| P168-chr13-32914522-R  | GTGAAGACTATGCTCAGTTCTG   |     |
| P169-chr13-32913422-F  | CAGAGAGGCCTGTAAAGACC     | 349 |
| P169-chr13-32913422-R  | TGAAGTCTGACTCACAGAAG     |     |
| P170-chr17-33434458-F  | GGCTATGCATCTACCACCC      | 369 |
| P170-chr17-33434458-R  | CCTCTCTGGAGAGCTGATCT     |     |
| P171-chr16-23641218-F  | GTGAATGACTCAATGGGTGG     | 432 |
| P171-chr16-23641218-R  | GGACCTTATTGTTCTACCAG     |     |
| P172-chr13-32911073-F  | GTTCTGTCAAACCTAGTCATG    | 424 |
| P172-chr13-32911073-R  | CGTTTACACAAGTCAAGTCTG    |     |
| P173-chr16-23635403-F  | CTTTCAAGACTCAAGCCTAG     | 529 |
| P173-chr16-23635403-R  | GCTTTACACAGAGGTGCCCA     |     |
| P174-chr19-1221947-F   | TGTCAGGGTTGTCTGCTGCAC    | 618 |
| P174-chr19-1221947-R   | ACGGACGCATGTCCTCACTC     |     |
| P175-chr7-117254665-F  | GTGATATGTGCCCTAGGAG      | 388 |
| P175-chr7-117254665-R  | CTTCATAGTGGCTATCTATG     |     |
| P176-chr2-47698134-F   | TTGTGCCATTGCGCTATTC      | 499 |
| P176-chr2-47698134-R   | TCCAGTTATGTGTCCTACTG     |     |
| P177-chr17-41244821-F  | AGTGGTGGTATACGATATG      | 459 |
| P177-chr17-41244821-R  | GTATCCATTGGGACATGAAG     |     |
| P178-chr7-117232086-F  | CTGTGTCTGTAAACTGATGGC    | 397 |
| P178-chr7-117232086-R  | CATTTGTAAGGGAGTCTTTTGC   |     |
| P179-chr17-59878688-F  | CACTTCAGTCACTATGTTCC     | 546 |
| P179-chr17-59878688-R  | GTGGCTTTAATGATGTTCC      |     |
| P180-chr7-117180229-F  | GGTCACACAGGTCATATGATG    | 599 |
| P180-chr7-117180229-R  | CCACTCTCATCCATCATACTG    |     |
| P181-chr17-41244280-F  | TCATCTAACAGGTCATCAGG     | 539 |
| P181-chr17-41244280-R  | CCATATCGTATAACCACCAC     |     |

|                       |                         |     |
|-----------------------|-------------------------|-----|
| P182-chr2-47657081-F  | GATGCAGAATTGAGGCAGAC    | 272 |
| P182-chr2-47657081-R  | CTAAGAGTGAGTCACCACCAC   |     |
| P183-chr13-32954272-F | GTATCAACAACACTACCGGTAC  | 377 |
| P183-chr13-32954272-R | GGCTTACTTTCAGATCACTAG   |     |
| P1-chr2-47643505-F    | CTCCAGTCTGGGCAATAGAG    | 457 |
| P1-chr2-47643505-R    | ATCATGTGGGTAAGTGCAGG    |     |
| P2-chr3-37067240-F    | TTGCTACCAGGACTTGCTGGC   | 300 |
| P2-chr3-37067240-R    | CAAGCTCTGATTTTTGGCAGC   |     |
| P3-chr13-32912345-F   | AGTGAGGAACTTCTGCAGAG    | 343 |
| P3-chr13-32912345-R   | GCTGATCAGTAAATAGCAAGTCC |     |
| P4-chr16-23614921-F   | CTAAGAGGCCCAATATATCC    | 272 |
| P4-chr16-23614921-R   | GTATGCTATCAGGTTCCCTGG   |     |
| P5-chr13-32910922-F   | ATCATGAAAATGCCAGCACTC   | 356 |
| P5-chr13-32910922-R   | TTCAGAGTCTGGATTGACAG    |     |
| P6-chr5-147207583-F   | CTTTTCTCGGGGTGAGATTC    | 387 |
| P6-chr5-147207583-R   | GAAATAGCAGAGGCATGAC     |     |
| P7-chr7-117188684-F   | AGATCATGTCTCTAGAAACCG   | 424 |
| P7-chr7-117188684-R   | GACATGGACACCAAATTAAG    |     |
| P8-chr7-142459789-F   | CATGAGCAGAGAGCTTGAGGAAC | 550 |
| P8-chr7-142459789-R   | GTTCTCCATTGTCTGTC       |     |
| P9-chr3-37053348-F    | TCCATGAAGTTTCTGCTGG     | 467 |
| P9-chr3-37053348-R    | CTAACAGCATTTCCAAAGATGG  |     |
| P10-chr15-40494810-F  | AAGTGAGGATAAATTAGGG     | 409 |
| P10-chr15-40494810-R  | CACAATTTTGCCAACACTTG    |     |
| P11-chr2-47641557-F   | TAGGTTGCAGTTTCATCACTG   | 446 |
| P11-chr2-47641557-R   | CTGTAATCCCAACTACTTGG    |     |
| P12-chr2-47641559-F   | TGCAGTTTCATCACTGTCTG    | 289 |
| P12-chr2-47641559-R   | GCTAGTTATCTAATCCAAG     |     |
| P13-chr2-48033498-F   | GGTACTGCAACATTTGATGG    | 430 |
| P13-chr2-48033498-R   | GTGACTGATTCATCTTCTC     |     |
| P14-chr2-47639648-F   | CAGTACATCATATCAGTGTC    | 432 |
| P14-chr2-47639648-R   | CATTGATACACAGTTTAGG     |     |
| P15-chr2-47698134-F   | CTACATTTGTCCCTAAGGAG    | 438 |
| P15-chr2-47698134-R   | GTTATGTGTCCTACTGTAAC    |     |
| P16-chr7-117232470-F  | CAATCCAATCAACTCTATACG   | 390 |
| P16-chr7-117232470-R  | CCTACCTTTAAGTCTTCTTCG   |     |
| P17-chr11-108216476-F | GTAGGTAATGTATCCTGTTC    | 323 |
| P17-chr11-108216476-R | GTGCTCAATCTACTATATG     |     |
| P18-chr17-41215382-F  | AGTGGTGCATTGATGGAAGG    | 367 |
| P18-chr17-41215382-R  | AGTCGGCAGGAATCCATGTG    |     |
| P19-chr2-47641545-F   | CCAGTGGTATAGAAATCTTCG   | 290 |

|                       |                        |     |
|-----------------------|------------------------|-----|
| P19-chr2-47641545-R   | GCTCCTTTATAAGCTTCTTCAG |     |
| P20-chr7-117232266-F  | CTACAGCCAGACTTTAGCTC   | 422 |
| P20-chr7-117232266-R  | GAGTGTGTCATCAGGTTTCAG  |     |
| P21-chr17-41246508-F  | GTCATCAGAACCTAACAG     | 384 |
| P21-chr17-41246508-R  | CATGTGGAGCCATGTGGCA    |     |
| P22-chr17-41243677-F  | CAATTCCTTGTCACCTCAGAC  | 434 |
| P22-chr17-41243677-R  | CACATTTGGCTCAGGGTTAC   |     |
| P23-chr11-108121593-F | AGGCTACAGATTGCAACCC    | 413 |
| P23-chr11-108121593-R | GTTTATCTGTAAGTCAGAC    |     |
| P24-chr3-37067242-F   | ATACAGACTTTGCTACCAGG   | 447 |
| P24-chr3-37067242-R   | AGCCAAAGTTAGAAGGCAG    |     |
| P25-chr17-41215387-F  | AGTGCAGGCCTGCATAATTC   | 532 |
| P25-chr17-41215387-R  | AGATAAGCTGGTGATGCTGG   |     |
| P26-chr17-41203122-F  | GCCTCTAGAACATTTTCAGC   | 350 |
| P26-chr17-41203122-R  | GACATTGGACTGCTTGTC     |     |
| P27-chr11-108160486-F | CTTGCCATATGTGAGCAAGC   | 394 |
| P27-chr11-108160486-R | GCATGGTGGTATGCTCCTG    |     |
| P28-chr17-7577121-F   | ATCTGAGGCATAACTGCACC   | 400 |
| P28-chr17-7577121-R   | CTCCTTACTGCTCCCACTCAG  |     |
| P29-chr3-37059048-F   | GGGATGTGATGTGCATATCAC  | 513 |
| P29-chr3-37059048-R   | CGCCTACAAGCTATCAGCAC   |     |
| P30-chr15-40512842-F  | GTTCTAGGTATTACCTTACACC | 501 |
| P30-chr15-40512842-R  | GGCCATGAGTAAGTATATC    |     |
| P31-chr19-1220628-F   | CCTCAAATCTCCGACCTG     | 415 |
| P31-chr19-1220628-R   | CCATCTGCCGTATGAGTTAC   |     |
| P32-chr2-48030691-F   | CCTATAAAACACTTAGGCTG   | 474 |
| P32-chr2-48030691-R   | CAGGGAGTAATTTCCCTTTG   |     |
| P33-chr7-117267766-F  | GACAAATAGCAAGTGTTGC    | 593 |
| P33-chr7-117267766-R  | GATATTCTGCAAGTACAATC   |     |
| P34-chr2-48027625-F   | TGGTTCTACTGAAGGAACC    | 582 |
| P34-chr2-48027625-R   | CTTATGTCAGCAAGAGCTTGG  |     |
| P35-chr13-32968945-F  | TGCTTCCACATGACCTCAG    | 597 |
| P35-chr13-32968945-R  | CTTTACCTCACATACTACCTC  |     |
| P36-chr17-41234420-F  | ACCATGTATCTTCCATGGGCTC | 550 |
| P36-chr17-41234420-R  | CTTGTAGTTCCATACTAGGTG  |     |
| P37-chr7-117246728-F  | GAGTACCCACCTATTCCTGAC  | 589 |
| P37-chr7-117246728-R  | TTGGGCCAGGTAAGCAGTTCTG |     |
| P38-chr7-117120191-F  | GTGGAGAAAGCCGCTAGAGC   | 581 |
| P38-chr7-117120191-R  | GTGCATAGTAGCGTACTTGAG  |     |
| P39-chr13-32914790-F  | GAAGATAGTACCAAGCAAGTC  | 523 |
| P39-chr13-32914790-R  | GAATGTTCTCAACAAGTGAC   |     |

|                       |                         |     |
|-----------------------|-------------------------|-----|
| P40-chr13-32907420-F  | GGCAATATCTGGAACCTTCTCC  | 453 |
| P40-chr13-32907420-R  | CCTGAATCAGCATTTGCAAATG  |     |
| P41-chr2-47635538-F   | AACGGAAGTCTACCTGCAC     | 384 |
| P41-chr2-47635538-R   | ACCAATCATTCTCCTTGGATGC  |     |
| P42-chr17-41245724-F  | CTCTTCACTGCTAGAACAAC    | 422 |
| P42-chr17-41245724-R  | CATCAGGCCTTCATCCTGAG    |     |
| P43-chr17-7574003-F   | GTGGTTATAGGATTCAACCG    | 530 |
| P43-chr17-7574003-R   | CAGAGGCGGAGATTGCAATCAG  |     |
| P44-chr7-117180229-F  | TGCCCAAGGTCACACAGGTC    | 420 |
| P44-chr7-117180229-R  | GCAGCATTATGGTACATTACC   |     |
| P45-chr3-37083822-F   | CTCTAACCTGTCTGTTAGAG    | 591 |
| P45-chr3-37083822-R   | TCCCAAAGTGGTGGGATTAC    |     |
| P46-chr17-41245873-F  | CTGACTACTAGTTCAAGCGC    | 417 |
| P46-chr17-41245873-R  | GCCACAGATAATACAAGAGC    |     |
| P47-chr7-117149143-F  | ATCTGGCTGAGTGTGGTG      | 503 |
| P47-chr7-117149143-R  | GCTGAGCCCATTGAGATTG     |     |
| P48-chr13-32890627-F  | ACTAGCCACGTTTCGAGTGC    | 414 |
| P48-chr13-32890627-R  | GCAACACTGTGACGTAAGG     |     |
| P49-chr17-41223093-F  | AAGTCTTAGTCATTAGGGAG    | 368 |
| P49-chr17-41223093-R  | TCTCCATTTCCTTTCAGAGG    |     |
| P50-chr17-41245759-F  | ACTTGTCTGTTCAATTTGGC    | 620 |
| P50-chr17-41245759-R  | TAGGAGCATTTGTTACTGAGCC  |     |
| P51-chr17-41246618-F  | CCATCATGTGAGTCATCAGAAC  | 465 |
| P51-chr17-41246618-R  | GAACACCACTGAGAAGCGTG    |     |
| P52-chr17-41245586-F  | GCCATAATCAGTACCAGGTACC  | 572 |
| P52-chr17-41245586-R  | GCAGCAGTATAAGCAATATGG   |     |
| P53-chr7-117175335-F  | GCACATTGCTATGTGCTCC     | 445 |
| P53-chr7-117175335-R  | ATGACACTGAAGATCACTG     |     |
| P54-chr11-108151842-F | TAAGTCCCATAGTGCTGAGAACC | 373 |
| P54-chr11-108151842-R | TGTAAGAAACAGTGCATAACC   |     |
| P55-chr3-37067157-F   | CGGGCAGAATTGCTTCTATAAC  | 394 |
| P55-chr3-37067157-R   | TGCCACTAGAAATATCTGTC    |     |
| P56-chr13-32913456-F  | CCTTGAATTAGCATGTGAGACC  | 521 |
| P56-chr13-32913456-R  | AGCTGTTAGACATGCTACTG    |     |
| P57-chr11-108151896-F | AAGTCCCATAGTGCTGAGAACC  | 435 |
| P57-chr11-108151896-R | GGTGGACAAGTCATTCCTC     |     |
| P58-chr17-41215392-F  | AGCGCTGGGATTATAGGTATG   | 512 |
| P58-chr17-41215392-R  | GGACCTAATCTGCTCCTAGC    |     |
| P59-chr9-98002937-F   | CAAAACCACTCAACATTAGGTC  | 500 |
| P59-chr9-98002937-R   | TGTGCAAAGTATGATGGCGAG   |     |
| P60-chr16-23634452-F  | CCTAGTTACCCAACCTTCTC    | 473 |



|                       |                        |     |
|-----------------------|------------------------|-----|
| P60-chr16-23634452-R  | GTGGTGGTGCACCTATAATC   |     |
| P61-chr13-32911073-F  | CCTACTTCCAAGGATGTTCT   | 514 |
| P61-chr13-32911073-R  | TAATTGACACTTGGGTTGC    |     |
| P62-chr16-23625413-F  | CCAAGCAATCACTGTACCAAC  | 568 |
| P62-chr16-23625413-R  | GTGCCTGATTTCAATACCAG   |     |
| P63-chr19-1218414-F   | CACAGCACTGTGAACTCACAG  | 396 |
| P63-chr19-1218414-R   | CAGCCATTGCCACAATGGCTG  |     |
| P64-chr13-32929248-F  | CTAAGGAACGTCAAGAGATAC  | 400 |
| P64-chr13-32929248-R  | GTGAAAGTTACAGCTACTGC   |     |
| P65-chr13-32914522-F  | GAATGTAGCACGCATTAC     | 464 |
| P65-chr13-32914522-R  | ACTTGCTTTCCACTTGCTG    |     |
| P66-chr3-37081675-F   | CTCTGAGTTCCTGCTTTGTC   | 491 |
| P66-chr3-37081675-R   | ACCACATGTGTCTGACTCC    |     |
| P67-chr11-108224553-F | GTTGGGTTAAGAAGTAGTAGG  | 499 |
| P67-chr11-108224553-R | GTCTTGCTGTATTGCCTAG    |     |
| P68-chr13-32906565-F  | CTATGAGAAAGGTTGTGAG    | 380 |
| P68-chr13-32906565-R  | GGATCAGTATCATTGGTTC    |     |
| P69-chr16-89809210-F  | CTTGCTCCAAGCCACATTTTG  | 406 |
| P69-chr16-89809210-R  | CTAGTTTCTGATGGTCCTG    |     |
| P70-chr17-41215950-F  | CTGCTGCACATGGATTCCCTG  | 517 |
| P70-chr17-41215950-R  | CAGCCTCTGATTCTGTCAC    |     |
| P71-chr11-108213967-F | CTCCTAACTGGACAACTAAG   | 533 |
| P71-chr11-108213967-R | GCTGTCAGCTTTAATAAGCC   |     |
| P72-chr17-41234508-F  | GTAGGTAATCAGATGACAAC   | 509 |
| P72-chr17-41234508-R  | CTTGAGTTCCATACTAGG     |     |
| P73-chr17-41199722-F  | TGCCAAGAACTGTGCTACTC   | 457 |
| P73-chr17-41199722-R  | CAGGAGTTTGAGACCAGCCTGG |     |
| P74-chr17-41219625-F  | AGTAGAGACGGGGTTTCAC    | 389 |
| P74-chr17-41219625-R  | AGTTCCAGGACACGTGTAG    |     |
| P75-chr13-32954022-F  | TCACTTCTCCATTGCATC     | 416 |
| P75-chr13-32954022-R  | CGACAAATCCTATTAGGTCC   |     |
| P76-chr1-27106621-F   | CTTTGAGATGTCCAAACACC   | 422 |
| P76-chr1-27106621-R   | GTGTGGCCAGAATCAGGTCCAC |     |
| P77-chr17-41243479-F  | GGATGTTAAAGCTCATTCAGTC | 476 |
| P77-chr17-41243479-R  | GGCATCTCAGGAACATCAC    |     |
| P78-chr17-59885995-F  | CTAGCAATTCATGCACTTC    | 350 |
| P78-chr17-59885995-R  | CCATGTGAGGTTTGATAACG   |     |
| P79-chr3-37081767-F   | ACCAGGAGGCTCAATTCAGGC  | 490 |
| P79-chr3-37081767-R   | ACCCCTGCATGTTAACTAG    |     |
| P80-chr17-41245583-F  | CTTGGAAGGCTAGGATTGAC   | 428 |
| P80-chr17-41245583-R  | CCTATAAGCAGCAGTATAAGC  |     |

|                       |                        |     |
|-----------------------|------------------------|-----|
| P81-chr17-41222943-F  | GGTAAATTCACCCATGTGAG   | 575 |
| P81-chr17-41222943-R  | CCATCTTCAACCTCTGCATTG  |     |
| P82-chr3-37053500-F   | TTCAGTACACAATGCAGGC    | 435 |
| P82-chr3-37053500-R   | CTCCATTAACAAATCTGAAGC  |     |
| P83-chr16-89833576-F  | AAGGCAGCACTCAGCAGTC    | 439 |
| P83-chr16-89833576-R  | AGGACCAATGCTCAGGCCATC  |     |
| P84-chr17-59878688-F  | ATCCCACTTCAGTCACTATG   | 486 |
| P84-chr17-59878688-R  | GGTTCACATTTTCAGTTATGC  |     |
| P85-chr16-89831344-F  | CCATCTAAGTGCTGCTGTTC   | 462 |
| P85-chr16-89831344-R  | TTGCTCAGCCACTCACAGTG   |     |
| P86-chr7-117175301-F  | CCGATTCTATGTGTAGAATG   | 449 |
| P86-chr7-117175301-R  | CTATGCATAGAGCAGTCCTGG  |     |
| P87-chr19-1221319-F   | TAGCCTCCACTAGTGGAAGGTG | 360 |
| P87-chr19-1221319-R   | CAACCCTACATTTCTGCAC    |     |
| P201-chr13-32911228-F | TCCCATGGAAAAGAATCAAG   | 500 |
| P201-chr13-32911228-R | CTATATTCAAGGAGATGTCC   |     |
| P202-chr13-32906915-F | GATACTGATCCATTAGATTC   | 547 |
| P202-chr13-32906915-R | CCAGTCCACTTTCAGAGGCTTC |     |
| P203-chr17-33445587-F | TGAGATACCCATAACCCTG    | 480 |
| P203-chr17-33445587-R | TGCTACTGCACTCCAATCTG   |     |

| eTable 3. Prevalence of pathogenic germline mutations in PDAC and Chinese population. |              |                     |                   |                         |            |                                                  |                          |                           |         |
|---------------------------------------------------------------------------------------|--------------|---------------------|-------------------|-------------------------|------------|--------------------------------------------------|--------------------------|---------------------------|---------|
| Disease                                                                               | Gene         | Chromosome Position | Amino Acid Change | Nucleotide Change       | Function   | Gene group                                       | Nanjing Allele Count (%) | ChinaMap Allele Count (%) | P value |
| PDAC                                                                                  | <i>ATM</i>   | chr11:108153468     | p.Tyr1203Ter      | c.3609delT              | Nonsense   | Pancreatic cancer susceptibility genes           | 1/2,018 (0.05)           | 0/21,176 (0)              | 0.09    |
| PDAC                                                                                  | <i>ATM</i>   | chr11:108170440     | Splice            | c.5006-1G>A             | Noncoding  | Pancreatic cancer susceptibility genes           | 1/2,018 (0.05)           | 0/21,176 (0)              | 0.09    |
| PDAC                                                                                  | <i>ATM</i>   | chr11:108178646     | p.Cys1899Ter      | c.5697C>A               | Nonsense   | Pancreatic cancer susceptibility genes           | 1/2,018 (0.05)           | 2/21,176 (0.009)          | 0.61    |
| PDAC                                                                                  | <i>ATM</i>   | chr11:108186639     | Splice            | c.6095+1G>A             | Noncoding  | Pancreatic cancer susceptibility genes           | 1/2,018 (0.05)           | 0/21,176 (0)              | 0.09    |
| PDAC                                                                                  | <i>BRCA1</i> | chr17:41197809      | p.Ile1845fs       | c.5533_5540delATTGG GCA | Frameshift | Pancreatic cancer susceptibility genes           | 1/2,018 (0.05)           | 4/21,176 (0.019)          | 0.92    |
| PDAC                                                                                  | <i>BRCA1</i> | chr17:41219625      | p.Asp1713Asn      | c.5137G>A               | Missense   | Pancreatic cancer susceptibility genes           | 1/2,018 (0.05)           | 0/21,176 (0)              | 0.09    |
| PDAC                                                                                  | <i>BRCA1</i> | chr17:41245390      | p.Glu720fs        | c.2157_2158insA         | Frameshift | Pancreatic cancer susceptibility genes           | 1/2,018 (0.05)           | 0/21,176 (0)              | 0.09    |
| PDAC                                                                                  | <i>BRCA2</i> | chr13:32900280      | p.Lys157fs        | c.470_474delAGTCA       | Frameshift | Pancreatic cancer susceptibility genes           | 1/2,018 (0.05)           | 0/21,176 (0)              | 0.09    |
| PDAC                                                                                  | <i>BRCA2</i> | chr13:32906915      | p.Lys437fs        | c.1310_1313delAAGA      | Frameshift | Pancreatic cancer susceptibility genes           | 1/2,018 (0.05)           | 0/21,176 (0)              | 0.09    |
| PDAC                                                                                  | <i>BRCA2</i> | chr13:32907029      | p.Gln472Ter       | c.1414C>T               | Nonsense   | Pancreatic cancer susceptibility genes           | 1/2,018 (0.05)           | 0/21,176 (0)              | 0.09    |
| PDAC                                                                                  | <i>BRCA2</i> | chr13:32907371      | p.Lys586Ter       | c.1756A>T               | Nonsense   | Pancreatic cancer susceptibility genes           | 1/2,018 (0.05)           | 0/21,176 (0)              | 0.09    |
| PDAC                                                                                  | <i>BRCA2</i> | chr13:32911228      | p.Thr915fs        | c.2743_2747delACTTG     | Frameshift | Pancreatic cancer susceptibility genes           | 1/2,018 (0.05)           | 0/21,176 (0)              | 0.09    |
| PDAC                                                                                  | <i>BRCA2</i> | chr13:32912337      | p.Val1283fs       | c.3847_3848delGT        | Frameshift | Pancreatic cancer susceptibility genes           | 1/2,018 (0.05)           | 0/21,176 (0)              | 0.09    |
| PDAC                                                                                  | <i>BRCA2</i> | chr13:32914102      | p.Lys1872fs       | c.5616_5620delAGTAA     | Frameshift | Pancreatic cancer susceptibility genes           | 1/2,018 (0.05)           | 0/21,176 (0)              | 0.09    |
| PDAC                                                                                  | <i>BRCA2</i> | chr13:32921033      | p.Arg2336His      | c.7007G>A               | Missense   | Pancreatic cancer susceptibility genes           | 1/2,018 (0.05)           | 0/21,176 (0)              | 0.09    |
| PDAC                                                                                  | <i>BRCA2</i> | chr13:32944538      | Splice            | c.8332-1G>T             | Noncoding  | Pancreatic cancer susceptibility genes           | 1/2,018 (0.05)           | 0/21,176 (0)              | 0.09    |
| PDAC                                                                                  | <i>BRIP1</i> | chr17:59858254      | p.Arg581Ter       | c.1741C>T               | Nonsense   | Candidate pancreatic cancer susceptibility genes | 2/2,018 (0.10)           | 0/21,176 (0)              | 0.01    |
| PDAC                                                                                  | <i>BRIP1</i> | chr17:59878688      | p.Arg356Ter       | c.1066C>T               | Nonsense   | Candidate pancreatic cancer susceptibility genes | 1/2,018 (0.05)           | 0/21,176 (0)              | 0.09    |
| PDAC                                                                                  | <i>CFTR</i>  | chr7:117149143      | p.Arg74Trp        | c.220C>T                | Missense   | Pancreatitis associated genes                    | 2/2,018 (0.10)           | 20/21,176 (0.094)         | 0.75    |
| PDAC                                                                                  | <i>CFTR</i>  | chr7:117232086      | p.Gly622Asp       | c.1865G>A               | Missense   | Pancreatitis associated genes                    | 1/2,018 (0.05)           | 2/21,176 (0.009)          | 0.61    |
| PDAC                                                                                  | <i>CFTR</i>  | chr7:117246728      | p.Gly970Asp       | c.2909G>A               | Missense   | Pancreatitis associated genes                    | 3/2,018 (0.15)           | 15/21,176 (0.071)         | 0.43    |

|      |               |                |              |                 |            |                                                  |                 |                    |      |
|------|---------------|----------------|--------------|-----------------|------------|--------------------------------------------------|-----------------|--------------------|------|
| PDAC | <i>CFTR</i>   | chr7:117251704 | p.Arg1070Gln | c.3209G>A       | Missense   | Pancreatitis associated genes                    | 1/2,018 (0.05)  | 19/21,176 (0.090)  | 0.85 |
| PDAC | <i>CFTR</i>   | chr7:117254665 | Splice       | c.3368-2A>G     | Noncoding  | Pancreatitis associated genes                    | 1/2,018 (0.05)  | 0/21,176 (0)       | 0.09 |
| PDAC | <i>FANCC</i>  | chr9:98002929  | Splice       | c.345+2GT>T     | Noncoding  | Candidate pancreatic cancer susceptibility genes | 1/2,018 (0.05)  | 0/21,176 (0)       | 0.09 |
| PDAC | <i>FANCC</i>  | chr9:98002937  | p.Trp113Ter  | c.339G>A        | Nonsense   | Candidate pancreatic cancer susceptibility genes | 1/2,018 (0.05)  | 3/21,176 (0.014)   | 0.79 |
| PDAC | <i>PALB2</i>  | chr16:23614914 | p.Leu1143fs  | c.3426_3427insA | Frameshift | Pancreatic cancer susceptibility genes           | 1/2,018 (0.05)  | 0/21,176 (0)       | 0.09 |
| PDAC | <i>PALB2</i>  | chr16:23619181 | Splice       | c.3350+4A>G     | Noncoding  | Pancreatic cancer susceptibility genes           | 1/2,018 (0.05)  | 0/21,176 (0)       | 0.09 |
| PDAC | <i>PALB2</i>  | chr16:23635403 | p.Gln921fs   | c.2760_2761insA | Frameshift | Pancreatic cancer susceptibility genes           | 1/2,018 (0.05)  | 1/21,176 (0.005)   | 0.41 |
| PDAC | <i>PALB2</i>  | chr16:23641218 | p.Arg753Ter  | c.2257C>T       | Nonsense   | Pancreatic cancer susceptibility genes           | 1/2,018 (0.05)  | 3/21,176 (0.014)   | 0.79 |
| PDAC | <i>PALB2</i>  | chr16:23646660 | p.Leu403fs   | c.1206delT      | Frameshift | Pancreatic cancer susceptibility genes           | 1/2,018 (0.05)  | 0/21,176 (0)       | 0.09 |
| PDAC | <i>RAD51D</i> | chr17:33428225 | p.Arg320Ter  | c.958C>T        | Nonsense   | Known cancer susceptibility genes                | 1/2,018 (0.05)  | 4/21,176 (0.019)   | 0.92 |
| PDAC | <i>RAD51D</i> | chr17:33430317 | p.Arg252Ter  | c.754C>T        | Nonsense   | Known cancer susceptibility genes                | 1/2,018 (0.05)  | 0/21,176 (0)       | 0.09 |
| PDAC | <i>RAD51D</i> | chr17:33434458 | p.Lys111fs   | c.331_332insTA  | Frameshift | Known cancer susceptibility genes                | 1/2,018 (0.05)  | 12/21,176 (0.057)  | 0.72 |
| PDAC | <i>SPINK1</i> | chr5:147207583 | Splice       | c.194+2T>C      | Noncoding  | Pancreatitis associated genes                    | 21/2,018 (1.04) | 114/21,176 (0.538) | 0.01 |
| PDAC | <i>TP53</i>   | chr17:7577545  | p.Met246Val  | c.736A>G        | Missense   | Pancreatic cancer susceptibility genes           | 1/2,018 (0.05)  | 0/21,176 (0)       | 0.09 |
| PDAC | <i>XRCC2</i>  | chr7:152346380 | p.Arg64Ter   | c.190C>T        | Nonsense   | Candidate pancreatic cancer susceptibility genes | 1/2,018 (0.05)  | 0/21,176 (0)       | 0.09 |

| eTable 4. Variants of uncertain significance and novel variants detected. |        |     |       |                  |               |                   |                     |                   |            |                        |                                   |                          |
|---------------------------------------------------------------------------|--------|-----|-------|------------------|---------------|-------------------|---------------------|-------------------|------------|------------------------|-----------------------------------|--------------------------|
| Case ID                                                                   | Gender | Age | Race  | Disease          | Gene          | Amino Acid Change | Chromosome Position | Nucleotide Change | Function   | Clinvar Classification | Personal History of Other Disease | Family History of Cancer |
| P0105                                                                     | Female | 52  | Asian | Ampullary cancer | <i>ATM</i>    | p.Ala2324fs       | chr11:108196949     | c.6973_6974insTCG | Frameshift | Novel                  | Negative                          | Negative                 |
| P0107                                                                     | Male   | 78  | Asian | PDAC             | <i>RAD51B</i> | p.Leu172Trp       | chr14:68352648      | c.515T>G          | Missense   | Novel                  | Negative                          | Negative                 |
| P0107                                                                     | Male   | 78  | Asian | PDAC             | <i>MSH2</i>   | p.Pro618Leu       | chr2:47702257       | c.1853C>T         | Missense   | VUS                    | Negative                          | Negative                 |
| P0110                                                                     | Female | 73  | Asian | PDAC             | <i>ATM</i>    | p.Leu1608Ser      | chr11:108165700     | c.4823T>C         | Missense   | Novel                  | Negative                          | Negative                 |
| P0110                                                                     | Female | 73  | Asian | PDAC             | <i>ATM</i>    | p.Ala1634Gly      | chr11:108165778     | c.4901C>G         | Missense   | Novel                  | Negative                          | Negative                 |
| P0114                                                                     | Male   | 63  | Asian | PDAC             | <i>CPA1</i>   | p.Gln326Ter       | chr7:130025175      | c.976C>T          | Nonsense   | Novel                  | Negative                          | Negative                 |
| P0202                                                                     | Male   | 59  | Asian | PDAC             | <i>MSH2</i>   | p.Pro5Gln         | chr2:47630344       | c.14C>A           | Missense   | VUS                    | Negative                          | Negative                 |
| P0205                                                                     | Male   | 76  | Asian | PDAC             | <i>CDH1</i>   | p.Thr522Ile       | chr16:68849662      | c.1565C>T         | Missense   | VUS                    | Negative                          | Negative                 |
| P0207                                                                     | Male   | 62  | Asian | PDAC             | <i>BRCA1</i>  | p.Glu1017Gly      | chr17:41244498      | c.3050A>G         | Missense   | Novel                  | Negative                          | Negative                 |
| P0208                                                                     | Female | 65  | Asian | PDAC             | <i>MSH6</i>   | p.Tyr1066Cys      | chr2:48030583       | c.3197A>G         | Missense   | VUS                    | Negative                          | Negative                 |
| P0213                                                                     | Female | 46  | Asian | PDAC             | <i>CELA2A</i> | p.Asn244Ser       | chr1:15793972       | c.731A>G          | Missense   | Novel                  | Negative                          | Negative                 |
| P0213                                                                     | Female | 46  | Asian | PDAC             | <i>PALB2</i>  | p.Leu9Phe         | chr16:23652454      | c.25C>T           | Missense   | VUS                    | Negative                          | Negative                 |
| P0229                                                                     | Male   | 75  | Asian | PDAC             | <i>ATM</i>    | p.Ala3054Thr      | chr11:108236224     | c.9160G>A         | Missense   | VUS                    | Negative                          | Negative                 |
| P0235                                                                     | Male   | 69  | Asian | PDAC             | <i>FANCA</i>  | p.Pro799Ser       | chr16:89836354      | c.2395C>T         | Missense   | VUS                    | Negative                          | Negative                 |
| P0238                                                                     | Male   | 65  | Asian | PDAC             | <i>ERCC4</i>  | p.Ile266Met       | chr16:14024572      | c.798C>G          | Missense   | VUS                    | Negative                          | Negative                 |
| P0240                                                                     | Male   | 56  | Asian | PDAC             | <i>MSH2</i>   | p.Thr31Asn        | chr2:47630422       | c.92C>A           | Missense   | Novel                  | Negative                          | Negative                 |
| P0240                                                                     | Male   | 56  | Asian | PDAC             | <i>FANCL</i>  | p.Ser240Ala       | chr2:58390641       | c.718T>G          | Missense   | Novel                  | Negative                          | Negative                 |
| P0244                                                                     | Male   | 79  | Asian | PDAC             | <i>BRIP1</i>  | p.Leu881Ser       | chr17:59763460      | c.2642T>C         | Missense   | Novel                  | Negative                          | Negative                 |
| P0245                                                                     | Male   | 53  | Asian | PDAC             | <i>CFTR</i>   | p.Lys688Ter       | chr7:117232278      | c.2057_2058insA   | Nonsense   | Novel                  | Negative                          | Negative                 |
| P0247                                                                     | Male   | 69  | Asian | PDAC             | <i>PALB2</i>  | p.Thr710Met       | chr16:23641346      | c.2129C>T         | Missense   | VUS                    | Negative                          | Negative                 |
| P0249                                                                     | Male   | 67  | Asian | PDAC             | <i>BRCA1</i>  | p.Ile917Thr       | chr17:41244798      | c.2750T>C         | Missense   | VUS                    | Negative                          | Negative                 |
| P0251                                                                     | Female | 65  | Asian | PDAC             | <i>CLPS</i>   | p.Arg22fs         | chr6:35765000       | c.64_65delCG      | Frameshift | Novel                  | Negative                          | Negative                 |
| P0252                                                                     | Male   | 73  | Asian | PDAC             | <i>RECQL4</i> | p.Arg618Gln       | chr8:145739598      | c.1853G>A         | Missense   | VUS                    | Negative                          | Negative                 |
| P0261                                                                     | Female | 56  | Asian | PDAC             | <i>MSH6</i>   | p.Gly1069Arg      | chr2:48030591       | c.3205G>C         | Missense   | VUS                    | Breast cancer                     | Negative                 |
| P0261                                                                     | Female | 56  | Asian | PDAC             | <i>TNS3</i>   | p.Gly1120Asp      | chr7:47342646       | c.3359G>A         | Missense   | Novel                  | Breast cancer                     | Negative                 |
| P0267                                                                     | Female | 60  | Asian | PDAC             | <i>FANCA</i>  | p.Ser53Arg        | chr16:89882317      | c.157A>C          | Missense   | VUS                    | Negative                          | Negative                 |
| P0274                                                                     | Female | 76  | Asian | PDAC             | <i>BRCA2</i>  | p.Phe2457Leu      | chr13:32929361      | c.7371T>A         | Missense   | Novel                  | Negative                          | Negative                 |

|       |        |    |       |      |                  |              |                 |                         |            |       |                  |                          |
|-------|--------|----|-------|------|------------------|--------------|-----------------|-------------------------|------------|-------|------------------|--------------------------|
| P0275 | Male   | 61 | Asian | PDAC | <i>BRIP1</i>     | p.Ala745Thr  | chr17:59821817  | c.2233G>A               | Missense   | VUS   | Negative         | Negative                 |
| P0278 | Male   | 68 | Asian | PDAC | <i>TERT</i>      | p.Ser656Trp  | chr5:1279569    | c.1967C>G               | Missense   | Novel | Negative         | Negative                 |
| P0288 | Male   | 58 | Asian | PDAC | <i>WEE1</i>      | p.Ala281fs   | chr11:9597835   | c.841_842insA           | Frameshift | Novel | Negative         | Negative                 |
| P0301 | Male   | 59 | Asian | PDAC | <i>CTRB1</i>     | p.Trp225Gly  | chr16:75258645  | c.673T>G                | Missense   | Novel | Negative         | Negative                 |
| P0308 | Female | 64 | Asian | PDAC | <i>CFTR</i>      | p.Ile1131Thr | chr7:117254691  | c.3392T>C               | Missense   | Novel | Esophagus cancer | Negative                 |
| P0312 | Female | 63 | Asian | PDAC | <i>CEL</i>       | p.Pro323Leu  | chr9:135944122  | c.968C>T                | Missense   | Novel | Negative         | Negative                 |
| P0318 | Male   | 61 | Asian | PDAC | <i>RAD51D</i>    | p.Gln18Arg   | chr17:33446580  | c.53A>G                 | Missense   | VUS   | Negative         | Negative                 |
| P0330 | Female | 52 | Asian | PDAC | <i>BUB1</i>      | p.His163fs   | chr2:111427100  | c.487_496delCAT AATGTTC | Frameshift | Novel | Negative         | Negative                 |
| P0330 | Female | 52 | Asian | PDAC | <i>BUB1</i>      | p.Ser159Ter  | chr2:111427121  | c.476C>G                | Nonsense   | Novel | Negative         | Negative                 |
| P0332 | Male   | 53 | Asian | PDAC | <i>RNF43</i>     | p.Arg296His  | chr17:56437575  | c.887G>A                | Missense   | Novel | Negative         | Negative                 |
| P0347 | Male   | 64 | Asian | PDAC | <i>MSH6</i>      | p.Val1056Leu | chr2:48028288   | c.3166G>C               | Missense   | VUS   | Colon polyp      | Father with colon cancer |
| P0354 | Female | 49 | Asian | PDAC | <i>BAP1</i>      | p.Arg383Cys  | chr3:52438572   | c.1147C>T               | Missense   | VUS   | Negative         | Negative                 |
| P0356 | Female | 78 | Asian | PDAC | <i>BRCA2</i>     | p.Ile3169Thr | chr13:32971039  | c.9506T>C               | Missense   | VUS   | Negative         | Negative                 |
| P0379 | Male   | 61 | Asian | PDAC | <i>ATM</i>       | p.Glu699Gln  | chr11:108124737 | c.2095G>C               | Missense   | VUS   | Negative         | Negative                 |
| P0379 | Male   | 61 | Asian | PDAC | <i>ATM</i>       | p.Arg1086Cys | chr11:108143551 | c.3256C>T               | Missense   | VUS   | Negative         | Negative                 |
| P0410 | Male   | 58 | Asian | PDAC | <i>GRP</i>       | p.Arg141fs   | chr18:56897667  | c.422_425delGG AA       | Frameshift | Novel | Negative         | Negative                 |
| P0415 | Male   | 58 | Asian | PDAC | <i>BRIP1</i>     | p.Asn643Ile  | chr17:59857629  | c.1928A>T               | Missense   | Novel | Negative         | Negative                 |
| P0418 | Female | 74 | Asian | PDAC | <i>PMS2</i>      | p.Pro574Arg  | chr7:6026675    | c.1721C>G               | Missense   | Novel | Lung cancer      | Negative                 |
| P0418 | Female | 74 | Asian | PDAC | <i>FANCC</i>     | p.Arg535Cys  | chr9:97864063   | c.1603C>T               | Missense   | VUS   | Lung cancer      | Negative                 |
| P0419 | Male   | 48 | Asian | PDAC | <i>PNLIPRP 2</i> | p.Asn259fs   | chr10:118390822 | c.778_779insA           | Frameshift | Novel | Negative         | Negative                 |
| P0421 | Female | 68 | Asian | PDAC | <i>TNS3</i>      | p.Lys147fs   | chr7:47463734   | c.437_438insT           | Frameshift | Novel | Negative         | Negative                 |
| P0425 | Male   | 54 | Asian | PDAC | <i>TP53</i>      | p.Val157Ile  | chr17:7578461   | c.469G>A                | Missense   | VUS   | Negative         | Negative                 |
| P0426 | Male   | 71 | Asian | PDAC | <i>TP53</i>      | p.Ala86Val   | chr17:7579430   | c.257C>T                | Missense   | VUS   | Negative         | Negative                 |
| P0431 | Female | 67 | Asian | PDAC | <i>BRCA1</i>     | p.Gly813Val  | chr17:41245110  | c.2438G>T               | Missense   | Novel | Negative         | Negative                 |
| P0434 | Male   | 61 | Asian | PDAC | <i>BRCA2</i>     | p.Asp2438Asn | chr13:32929302  | c.7312G>A               | Missense   | Novel | Negative         | Negative                 |
| P0434 | Male   | 61 | Asian | PDAC | <i>MSH6</i>      | p.Asn345Ser  | chr2:48026156   | c.1034A>G               | Missense   | VUS   | Negative         | Negative                 |
| P0438 | Female | 69 | Asian | PDAC | <i>ATM</i>       | p.Ile326Thr  | chr11:108117766 | c.977T>C                | Missense   | VUS   | Negative         | Negative                 |
| P0448 | Female | 66 | Asian | PDAC | <i>PLA2G1B</i>   | p.Asn110fs   | chr12:120760113 | c.329delA               | Frameshift | Novel | Negative         | Negative                 |
| P0450 | Male   | 47 | Asian | PDAC | <i>FANCG</i>     | p.Glu134Val  | chr9:35078247   | c.401A>T                | Missense   | Novel | Negative         | Negative                 |
| P0457 | Male   | 68 | Asian | PDAC | <i>PNLIP</i>     | p.Glu196fs   | chr10:118314702 | c.584_585insG           | Frameshift | Novel | Negative         | Negative                 |

|       |        |    |       |      |                 |              |                 |                 |            |       |                    |                                |
|-------|--------|----|-------|------|-----------------|--------------|-----------------|-----------------|------------|-------|--------------------|--------------------------------|
| P0457 | Male   | 68 | Asian | PDAC | <i>BUB1B</i>    | p.Glu418Lys  | chr15:40488939  | c.1252G>A       | Missense   | Novel | Negative           | Negative                       |
| P0471 | Male   | 79 | Asian | PDAC | <i>BRCA1</i>    | p.Thr249Ala  | chr17:41246803  | c.745A>G        | Missense   | Novel | Negative           | Negative                       |
| P0473 | Male   | 62 | Asian | PDAC | <i>FANCA</i>    | p.Leu784fs   | chr16:89836399  | c.2349delG      | Frameshift | Novel | Negative           | Negative                       |
| P0480 | Male   | 52 | Asian | PDAC | <i>MSH2</i>     | p.Lys423Glu  | chr2:47657071   | c.1267A>G       | Missense   | VUS   | Cholangiocarcinoma | Negative                       |
| P0481 | Male   | 49 | Asian | PDAC | <i>PMS2</i>     | p.His435Tyr  | chr7:6027093    | c.1303C>T       | Missense   | VUS   | Negative           | Negative                       |
| P0486 | Male   | 61 | Asian | PDAC | <i>RAD51B</i>   | p.Tyr140Cys  | chr14:68331823  | c.419A>G        | Missense   | Novel | Negative           | Negative                       |
| P0488 | Female | 74 | Asian | PDAC | <i>CEL</i>      | p.Pro323Leu  | chr9:135944122  | c.968C>T        | Missense   | Novel | Negative           | Negative                       |
| P0493 | Male   | 68 | Asian | PDAC | <i>ATM</i>      | p.Ser2941Ala | chr11:108225572 | c.8821T>G       | Missense   | VUS   | Negative           | Brother with pancreatic cancer |
| P0494 | Male   | 70 | Asian | PDAC | <i>PNLIPRP2</i> | p.Thr448Asn  | chr10:118401790 | c.1345C>A       | Missense   | Novel | Negative           | Negative                       |
| P0501 | Male   | 78 | Asian | PDAC | <i>BRCA1</i>    | p.Thr1196Ile | chr17:41243961  | c.3587C>T       | Missense   | VUS   | Negative           | Negative                       |
| P0502 | Female | 75 | Asian | PDAC | <i>CELA3B</i>   | p.Ser16Ter   | chr1:22304865   | c.47C>G         | Nonsense   | Novel | Negative           | Negative                       |
| P0502 | Female | 75 | Asian | PDAC | <i>TNS3</i>     | p.Val218Phe  | chr7:47451396   | c.652G>T        | Missense   | Novel | Negative           | Negative                       |
| P0512 | Male   | 75 | Asian | PDAC | <i>ATM</i>      | p.Val2367Ile | chr11:108199757 | c.7099G>A       | Missense   | VUS   | Negative           | Negative                       |
| P0513 | Male   | 67 | Asian | PDAC | <i>FANCC</i>    | p.Leu486Pro  | chr9:97869424   | c.1457T>C       | Missense   | Novel | Negative           | Negative                       |
| P0516 | Female | 62 | Asian | PDAC | <i>RECQL4</i>   | p.Tyr519fs   | chr8:145740384  | c.1555_1556insC | Frameshift | Novel | Negative           | Negative                       |
| P0518 | Male   | 47 | Asian | PDAC | <i>PMS2</i>     | p.Val200Ile  | chr7:6038846    | c.598G>A        | Missense   | VUS   | Negative           | Negative                       |
| P0520 | Male   | 44 | Asian | PDAC | <i>BRCA2</i>    | p.Arg2991Cys | chr13:32953904  | c.8971C>T       | Missense   | VUS   | Negative           | Negative                       |
| P0525 | Male   | 62 | Asian | PDAC | <i>BRCA2</i>    | p.Arg2973Gly | chr13:32953616  | c.8917C>G       | Missense   | VUS   | Negative           | Negative                       |
| P0526 | Male   | 54 | Asian | PDAC | <i>MSH2</i>     | p.Phe366Leu  | chr2:47656900   | c.1096T>C       | Missense   | Novel | Negative           | Negative                       |
| P0532 | Female | 77 | Asian | PDAC | <i>CELA3A</i>   | p.Asp184His  | chr1:22333916   | c.550G>C        | Missense   | Novel | Negative           | Negative                       |
| P0541 | Male   | 72 | Asian | PDAC | <i>ATM</i>      | p.Arg2461His | chr11:108201015 | c.7382G>A       | Missense   | VUS   | Negative           | Negative                       |
| P0541 | Male   | 72 | Asian | PDAC | <i>BRIP1</i>    | p.Asn643Ile  | chr17:59857629  | c.1928A>T       | Missense   | Novel | Negative           | Negative                       |
| P0542 | Female | 61 | Asian | PDAC | <i>MSH2</i>     | p.Phe131Val  | chr2:47637257   | c.391T>G        | Missense   | VUS   | Negative           | Negative                       |
| P0551 | Male   | 59 | Asian | PDAC | <i>MSH6</i>     | p.Asn1020Asp | chr2:48028180   | c.3058A>G       | Missense   | VUS   | Negative           | Negative                       |
| P0553 | Male   | 62 | Asian | PDAC | <i>STK11</i>    | p.Thr189Ile  | chr19:1220473   | c.566C>T        | Missense   | VUS   | Negative           | Negative                       |
| P0553 | Male   | 62 | Asian | PDAC | <i>FANCL</i>    | p.Leu91fs    | chr2:58453863   | c.272delT       | Frameshift | Novel | Negative           | Negative                       |
| P0554 | Male   | 59 | Asian | PDAC | <i>MLH1</i>     | p.Asp450Tyr  | chr3:37067437   | c.1348G>T       | Missense   | VUS   | Negative           | Negative                       |
| P0558 | Female | 44 | Asian | PDAC | <i>FANCA</i>    | p.Pro799Ser  | chr16:89836354  | c.2395C>T       | Missense   | VUS   | Negative           | Negative                       |
| P0558 | Female | 44 | Asian | PDAC | <i>TNS3</i>     | p.Gly4Val    | chr7:47479224   | c.11G>T         | Missense   | Novel | Negative           | Negative                       |
| P0562 | Male   | 66 | Asian | PDAC | <i>ATM</i>      | p.Ala59Val   | chr11:108098606 | c.176C>T        | Missense   | VUS   | Negative           | Negative                       |

|       |        |    |       |                    |                 |              |                 |                 |            |       |                |          |
|-------|--------|----|-------|--------------------|-----------------|--------------|-----------------|-----------------|------------|-------|----------------|----------|
| P0572 | Male   | 75 | Asian | PDAC               | <i>ATM</i>      | p.Ala1954Gly | chr11:108180985 | c.5861C>G       | Missense   | VUS   | Negative       | Negative |
| P0579 | Female | 65 | Asian | PDAC               | <i>BRCA1</i>    | p.Met18Val   | chr17:41276062  | c.52A>G         | Missense   | VUS   | Negative       | Negative |
| P0589 | Male   | 63 | Asian | PDAC               | <i>ATM</i>      | p.Leu3048Val | chr11:108236206 | c.9142C>G       | Missense   | VUS   | Negative       | Negative |
| P0589 | Male   | 63 | Asian | PDAC               | <i>FANCG</i>    | p.Val244Met  | chr9:35077015   | c.730G>A        | Missense   | VUS   | Negative       | Negative |
| P0591 | Male   | 71 | Asian | PDAC               | <i>ERCC4</i>    | p.Arg158fs   | chr16:14020500  | c.471_472insT   | Frameshift | Novel | Negative       | Negative |
| P0596 | Male   | 70 | Asian | PDAC               | <i>CEL</i>      | p.Gly137Val  | chr9:135940487  | c.410G>T        | Missense   | Novel | Negative       | Negative |
| P0619 | Male   | 72 | Asian | Ampullary cancer   | <i>MSH6</i>     | p.Gly1069Arg | chr2:48030591   | c.3205G>C       | Missense   | VUS   | Negative       | Negative |
| P0620 | Male   | 58 | Asian | PDAC               | <i>PNLIPRP2</i> | p.Arg90Cys   | chr10:118385520 | c.270C>T        | Missense   | Novel | Negative       | Negative |
| P0621 | Male   | 65 | Asian | PDAC               | <i>ATM</i>      | p.Ile879Val  | chr11:108138066 | c.2635A>G       | Missense   | VUS   | Negative       | Negative |
| P0626 | Female | 54 | Asian | Cholangiocarcinoma | <i>ATM</i>      | p.Phe802Leu  | chr11:108129740 | c.2404T>C       | Missense   | Novel | Negative       | Negative |
| P0627 | Female | 51 | Asian | PDAC               | <i>BRCA2</i>    | p.Lys2496Asn | chr13:32930617  | c.7488G>C       | Missense   | VUS   | Negative       | Negative |
| P0645 | Male   | 42 | Asian | PDAC               | <i>CFTR</i>     | p.Arg1358Lys | chr7:117304851  | c.4073G>A       | Missense   | Novel | Negative       | Negative |
| P0653 | Female | 72 | Asian | PDAC               | <i>FANCA</i>    | p.Arg600His  | chr16:89845236  | c.1799G>A       | Missense   | Novel | Lung cancer    | Negative |
| P0667 | Female | 61 | Asian | PDAC               | <i>BRIP1</i>    | p.Ser409Gly  | chr17:59876576  | c.1225A>G       | Missense   | Novel | Negative       | Negative |
| P0678 | Male   | 65 | Asian | PDAC               | <i>PALB2</i>    | p.Asp446Gly  | chr16:23646530  | c.1337A>G       | Missense   | VUS   | Negative       | Negative |
| P0682 | Male   | 64 | Asian | PDAC               | <i>ATM</i>      | p.Ala1079Ser | chr11:108143530 | c.3235G>T       | Missense   | Novel | Negative       | Negative |
| P0684 | Male   | 61 | Asian | PDAC               | <i>ARID1A</i>   | p.Arg1658Trp | chr1:27101690   | c.4972C>T       | Missense   | Novel | Negative       | Negative |
| P0687 | Male   | 70 | Asian | PDAC               | <i>CDH1</i>     | p.Ala289Thr  | chr16:68845619  | c.865G>A        | Missense   | VUS   | Negative       | Negative |
| P0692 | Male   | 66 | Asian | PDAC               | <i>CTRB1</i>    | p.Gly18Arg   | chr16:75252957  | c.52G>C         | Missense   | Novel | Negative       | Negative |
| P0695 | Male   | 74 | Asian | PDAC               | <i>CDH1</i>     | p.Pro88Arg   | chr16:68835672  | c.263C>G        | Missense   | VUS   | Gastric cancer | Negative |
| P0701 | Female | 59 | Asian | PDAC               | <i>BUB3</i>     | p.Asp96fs    | chr10:124917265 | c.287delA       | Frameshift | Novel | Negative       | Negative |
| P0702 | Male   | 69 | Asian | PDAC               | <i>ARID1A</i>   | p.Ala183Thr  | chr1:27023441   | c.547G>A        | Missense   | Novel | Negative       | Negative |
| P0706 | Female | 63 | Asian | PDAC               | <i>CTRC</i>     | p.His110Tyr  | chr1:15769040   | c.328C>T        | Missense   | Novel | Negative       | Negative |
| P0708 | Female | 63 | Asian | PDAC               | <i>CPA1</i>     | p.Phe20Leu   | chr7:130020421  | c.60T>G         | Missense   | Novel | Negative       | Negative |
| P0721 | Female | 65 | Asian | PDAC               | <i>PNLIPRP2</i> | p.Asp124Asn  | chr10:118386414 | c.372G>A        | Missense   | Novel | Negative       | Negative |
| P0724 | Male   | 53 | Asian | PDAC               | <i>XRCC3</i>    | p.Ser110Leu  | chr14:104173417 | c.329C>T        | Missense   | Novel | Negative       | Negative |
| P0733 | Male   | 66 | Asian | PDAC               | <i>CFTR</i>     | p.Glu621Ter  | chr7:117232080  | c.1860_1861insT | Nonsense   | Novel | Negative       | Negative |
| P0735 | Male   | 64 | Asian | PDAC               | <i>RAD51C</i>   | p.Arg12Gly   | chr17:56770038  | c.34C>G         | Missense   | Novel | Negative       | Negative |
| P0737 | Female | 62 | Asian | PDAC               | <i>CTRC</i>     | p.Trp191Arg  | chr1:15771178   | c.571T>C        | Missense   | Novel | Negative       | Negative |
| P0739 | Female | 65 | Asian | PDAC               | <i>PNLIPRP2</i> | p.Thr176Lys  | chr10:118387335 | c.529C>A        | Missense   | Novel | Negative       | Negative |



|       |        |    |       |                      |               |              |                 |                 |            |       |               |          |
|-------|--------|----|-------|----------------------|---------------|--------------|-----------------|-----------------|------------|-------|---------------|----------|
| P0739 | Female | 65 | Asian | PDAC                 | <i>ATM</i>    | p.Asp1540Tyr | chr11:108164046 | c.4618G>T       | Missense   | VUS   | Negative      | Negative |
| P0741 | Male   | 70 | Asian | PDAC                 | <i>BRCA2</i>  | p.Asn1718Lys | chr13:32913646  | c.5154T>G       | Missense   | Novel | Negative      | Negative |
| P0742 | Female | 72 | Asian | PDAC                 | <i>RNF43</i>  | p.Glu284fs   | chr17:56437610  | c.851_852insT   | Frameshift | Novel | Breast cancer | Negative |
| P0747 | Female | 76 | Asian | PDAC                 | <i>CEL</i>    | p.Pro323Leu  | chr9:135944122  | c.968C>T        | Missense   | Novel | Negative      | Negative |
| P0749 | Male   | 60 | Asian | PDAC                 | <i>CPBI</i>   | p.Trp128Cys  | chr3:148558672  | c.384G>C        | Missense   | Novel | Negative      | Negative |
| P0751 | Male   | 68 | Asian | PDAC                 | <i>CFTR</i>   | p.Val1272Gly | chr7:117282589  | c.3815T>G       | Missense   | Novel | Negative      | Negative |
| P0754 | Male   | 56 | Asian | PDAC                 | <i>PALB2</i>  | p.His394Leu  | chr16:23646686  | c.1181A>T       | Missense   | Novel | Negative      | Negative |
| P0764 | Female | 67 | Asian | PDAC                 | <i>NOC2L</i>  | p.Leu76Val   | chr1:892607     | c.226C>G        | Missense   | Novel | Negative      | Negative |
| P0768 | Male   | 62 | Asian | PDAC                 | <i>PMS2</i>   | p.Gln244Arg  | chr7:6037029    | c.731A>G        | Missense   | Novel | Negative      | Negative |
| P0778 | Female | 61 | Asian | PDAC                 | <i>FANCA</i>  | p.Pro799Ser  | chr16:89836354  | c.2395C>T       | Missense   | VUS   | Negative      | Negative |
| P0778 | Female | 61 | Asian | PDAC                 | <i>PMS2</i>   | p.Asp526Glu  | chr7:6026818    | c.1578C>G       | Missense   | VUS   | Negative      | Negative |
| P0784 | Male   | 40 | Asian | PDAC                 | <i>CPBI</i>   | p.Glu192Asp  | chr3:148559711  | c.576G>C        | Missense   | Novel | Negative      | Negative |
| P0788 | Male   | 66 | Asian | PDAC                 | <i>BRCA2</i>  | p.Leu1240fs  | chr13:32912206  | c.3717_3718insA | Frameshift | Novel | Negative      | Negative |
| P0789 | Female | 61 | Asian | PDAC                 | <i>MLH1</i>   | p.Asn248Ser  | chr3:37055988   | c.743A>G        | Missense   | VUS   | Negative      | Negative |
| P0808 | Male   | 53 | Asian | Chronic pancreatitis | <i>CPA1</i>   | p.Phe52Leu   | chr7:130021477  | c.154T>C        | Missense   | Novel | Negative      | Negative |
| P0818 | Female | 36 | Asian | Chronic pancreatitis | <i>ATM</i>    | p.Asn1431Ser | chr11:108160384 | c.4292A>G       | Missense   | VUS   | Negative      | Negative |
| P0820 | Male   | 54 | Asian | Chronic pancreatitis | <i>BRCA2</i>  | p.Ile1664Phe | chr13:32913482  | c.4990A>T       | Missense   | Novel | Negative      | Negative |
| P0820 | Male   | 54 | Asian | Chronic pancreatitis | <i>NOC2L</i>  | p.Gln599Ter  | chr1:881790     | c.1795C>T       | Nonsense   | Novel | Negative      | Negative |
| P0830 | Male   | 46 | Asian | Acute pancreatitis   | <i>ARID1A</i> | p.Ala1522Thr | chr1:27101282   | c.4564G>A       | Missense   | Novel | Negative      | Negative |
| P0830 | Male   | 46 | Asian | Acute pancreatitis   | <i>BRCA2</i>  | p.Asp1864Asn | chr13:32914082  | c.5590G>A       | Missense   | VUS   | Negative      | Negative |
| P0830 | Male   | 46 | Asian | Acute pancreatitis   | <i>CFTR</i>   | p.Gly1237Asp | chr7:117267817  | c.3710G>A       | Missense   | VUS   | Negative      | Negative |
| P0832 | Male   | 79 | Asian | Acute pancreatitis   | <i>ATM</i>    | p.Pro37His   | chr11:108098540 | c.110C>A        | Missense   | Novel | Negative      | Negative |
| P0832 | Male   | 79 | Asian | Acute pancreatitis   | <i>PALB2</i>  | p.Ile966Val  | chr16:23634390  | c.2896A>G       | Missense   | VUS   | Negative      | Negative |
| P0835 | Male   | 42 | Asian | Acute pancreatitis   | <i>BRIP1</i>  | p.Leu340Phe  | chr17:59878736  | c.1018C>T       | Missense   | VUS   | Negative      | Negative |
| P0838 | Male   | 38 | Asian | Acute pancreatitis   | <i>CELA2A</i> | p.Gly242Ala  | chr1:15793966   | c.725G>C        | Missense   | Novel | Negative      | Negative |
| P0839 | Female | 60 | Asian | Acute pancreatitis   | <i>IDO2</i>   | p.Thr149Met  | chr8:39840262   | c.446C>T        | Missense   | Novel | Negative      | Negative |
| P0843 | Female | 63 | Asian | Acute pancreatitis   | <i>NOC2L</i>  | p.His111Arg  | chr1:892501     | c.332A>G        | Missense   | Novel | Negative      | Negative |

|       |        |    |       |                    |                 |              |                 |                        |            |       |          |          |
|-------|--------|----|-------|--------------------|-----------------|--------------|-----------------|------------------------|------------|-------|----------|----------|
| P0845 | Male   | 81 | Asian | Acute pancreatitis | <i>RECQL4</i>   | p.Pro597Ser  | chr8:145739662  | c.1789C>T              | Missense   | VUS   | Negative | Negative |
| P0850 | Male   | 55 | Asian | Acute pancreatitis | <i>BRCA2</i>    | p.Ile729Thr  | chr13:32910678  | c.2186T>C              | Missense   | VUS   | Negative | Negative |
| P0850 | Male   | 55 | Asian | Acute pancreatitis | <i>BAP1</i>     | p.Arg518Trp  | chr3:52437609   | c.1552C>T              | Missense   | VUS   | Negative | Negative |
| P0862 | Female | 55 | Asian | Acute pancreatitis | <i>CFTR</i>     | p.Ala1009Thr | chr7:117250609  | c.3025G>A              | Missense   | VUS   | Negative | Negative |
| P0865 | Male   | 83 | Asian | Acute pancreatitis | <i>ERBB2</i>    | p.Gly292Ser  | chr17:37866707  | c.874G>A               | Missense   | Novel | Negative | Negative |
| P0866 | Female | 42 | Asian | Acute pancreatitis | <i>TNS3</i>     | p.Pro289Ser  | chr7:47440044   | c.865C>T               | Missense   | Novel | Negative | Negative |
| P0868 | Female | 68 | Asian | Acute pancreatitis | <i>ATM</i>      | p.Gly1788Ser | chr11:108173622 | c.5362G>A              | Missense   | VUS   | Negative | Negative |
| P0881 | Male   | 24 | Asian | Acute pancreatitis | <i>GZMK</i>     | p.Gly215Glu  | chr5:54329603   | c.644G>A               | Missense   | Novel | Negative | Negative |
| P0893 | Male   | 73 | Asian | PDAC               | <i>RAD51C</i>   | p.Arg370Ter  | chr17:56811560  | c.1108C>T              | Nonsense   | VUS   | Negative | Negative |
| P0907 | Male   | 70 | Asian | PDAC               | <i>TP53</i>     | p.Pro92Thr   | chr17:7579413   | c.274C>A               | Missense   | Novel | Negative | Negative |
| P0913 | Female | 25 | Asian | SPT                | <i>BAP1</i>     | p.Thr467Pro  | chr3:52437762   | c.1399A>C              | Missense   | VUS   | Negative | Negative |
| P0918 | Female | 50 | Asian | SPT                | <i>CFTR</i>     | p.Gly1349Ser | chr7:117304823  | c.4045G>A              | Missense   | VUS   | Negative | Negative |
| P0918 | Female | 50 | Asian | SPT                | <i>MSH6</i>     | p.Ala494Pro  | chr2:48026602   | c.1480G>C              | Missense   | Novel | Negative | Negative |
| P0919 | Male   | 74 | Asian | IPMN               | <i>BRIP1</i>    | p.Leu1105Phe | chr17:59761092  | c.3315G>T              | Missense   | Novel | Negative | Negative |
| P0919 | Male   | 74 | Asian | IPMN               | <i>BUB1B</i>    | p.Ser529fs   | chr15:40494622  | c.1585_1586insT        | Frameshift | Novel | Negative | Negative |
| P0920 | Female | 18 | Asian | MCN                | <i>BRCA2</i>    | p.Ile2628Met | chr13:32936738  | c.7884A>G              | Missense   | VUS   | Negative | Negative |
| P0921 | Female | 26 | Asian | SPT                | <i>BRCA1</i>    | p.Pro115Leu  | chr17:41256236  | c.344C>T               | Missense   | VUS   | Negative | Negative |
| P0928 | Male   | 39 | Asian | PNET               | <i>NOC2L</i>    | p.Thr616fs   | chr1:881625     | c.1844_1845insT        | Frameshift | Novel | Negative | Negative |
| P0932 | Female | 54 | Asian | PDAC               | <i>ARID1A</i>   | p.Gln1327fs  | chr1:27100181   | c.3977_3978insC<br>GCA | Frameshift | Novel | Negative | Negative |
| P0932 | Female | 54 | Asian | PDAC               | <i>CFTR</i>     | p.Phe508fs   | chr7:117199645  | c.1520_1521insA        | Frameshift | Novel | Negative | Negative |
| P0935 | Female | 67 | Asian | PDAC               | <i>BRIP1</i>    | p.Met1Val    | chr17:59938900  | c.1A>G                 | Missense   | VUS   | Negative | Negative |
| P0938 | Male   | 41 | Asian | Acute pancreatitis | <i>ERBB2</i>    | p.Tyr554Asn  | chr17:37872781  | c.1660T>A              | Missense   | Novel | Negative | Negative |
| P0939 | Female | 33 | Asian | MCN                | <i>PMS2</i>     | p.Val200Ile  | chr7:6038846    | c.598G>A               | Missense   | VUS   | Negative | Negative |
| P0941 | Male   | 59 | Asian | IPMN               | <i>PNLIPRP2</i> | p.Lys117fs   | chr10:118386389 | c.350_351delGA         | Frameshift | Novel | Negative | Negative |
| P0949 | Male   | 54 | Asian | PNET               | <i>BRCA1</i>    | p.His1455Leu | chr17:41231410  | c.4364A>T              | Missense   | Novel | Negative | Negative |
| P0951 | Female | 29 | Asian | SPT                | <i>CPBI</i>     | p.Pro313Arg  | chr3:148563370  | c.938C>G               | Missense   | Novel | Negative | Negative |
| P0953 | Female | 58 | Asian | PNET               | <i>ARID1A</i>   | p.Arg1566fs  | chr1:27101415   | c.4697_4699delG<br>GC  | Frameshift | Novel | Negative | Negative |

|       |        |    |       |                      |                 |              |                 |                       |            |       |               |                              |
|-------|--------|----|-------|----------------------|-----------------|--------------|-----------------|-----------------------|------------|-------|---------------|------------------------------|
| P0955 | Female | 74 | Asian | MCN                  | <i>ATM</i>      | p.Asn2875Asp | chr11:108218044 | c.8623A>G             | Missense   | Novel | Negative      | Negative                     |
| P0958 | Female | 74 | Asian | PDAC                 | <i>ATM</i>      | p.Lys50Gln   | chr11:108098578 | c.148A>C              | Missense   | VUS   | Negative      | Negative                     |
| P0968 | Female | 48 | Asian | PNET                 | <i>BRCA2</i>    | p.Glu3377Asp | chr13:32972781  | c.10131A>C            | Missense   | VUS   | Negative      | Negative                     |
| P0971 | Male   | 29 | Asian | SPT                  | <i>FANCC</i>    | p.Gln283Pro  | chr9:97888859   | c.848A>C              | Missense   | Novel | Negative      | Negative                     |
| P0975 | Female | 63 | Asian | PNET                 | <i>FANCA</i>    | p.Ser119Cys  | chr16:89877407  | c.356C>G              | Missense   | VUS   | Negative      | Negative                     |
| P0977 | Female | 46 | Asian | PNET                 | <i>BAP1</i>     | p.Arg389His  | chr3:52438553   | c.1166G>A             | Missense   | Novel | Negative      | Negative                     |
| P0994 | Female | 30 | Asian | PNET                 | <i>MSH6</i>     | p.Pro1073Arg | chr2:48030604   | c.3218C>G             | Missense   | VUS   | Negative      | Negative                     |
| P1001 | Female | 56 | Asian | SPT                  | <i>BRCA2</i>    | p.Asn2208Ile | chr13:32915115  | c.6623A>T             | Missense   | Novel | Breast cancer | Negative                     |
| P1020 | Male   | 26 | Asian | Acute pancreatitis   | <i>PALB2</i>    | p.Met416Thr  | chr16:23646620  | c.1247T>C             | Missense   | Novel | Negative      | Negative                     |
| P1022 | Female | 63 | Asian | Chronic pancreatitis | <i>ARID1A</i>   | p.His205Arg  | chr1:27023508   | c.614A>G              | Missense   | Novel | Negative      | Negative                     |
| P1024 | Male   | 42 | Asian | SCN                  | <i>FANCA</i>    | p.Leu518Pro  | chr16:89849428  | c.1553T>C             | Missense   | Novel | Negative      | Negative                     |
| P1027 | Male   | 50 | Asian | Chronic pancreatitis | <i>MLH1</i>     | p.Lys254Arg  | chr3:37056006   | c.761A>G              | Missense   | VUS   | Colon polyp   | Negative                     |
| P1028 | Male   | 59 | Asian | IPMN                 | <i>ARID1A</i>   | p.Arg2153Cys | chr1:27106846   | c.6457C>T             | Missense   | Novel | Negative      | Negative                     |
| P1034 | Male   | 37 | Asian | Chronic pancreatitis | <i>ATM</i>      | p.Leu1111Phe | chr11:108150264 | c.3331C>T             | Missense   | Novel | Negative      | Negative                     |
| P1038 | Male   | 52 | Asian | Chronic pancreatitis | <i>RECQL4</i>   | p.His745Tyr  | chr8:145738832  | c.2233C>T             | Missense   | VUS   | Negative      | Negative                     |
| P1040 | Male   | 50 | Asian | Chronic pancreatitis | <i>SPINK1</i>   | p.Lys31fs    | chr5:147207677  | c.93_101delATG TTACAA | Frameshift | Novel | Negative      | Negative                     |
| P1041 | Male   | 48 | Asian | Chronic pancreatitis | <i>PNLIPRP2</i> | p.Gly235Arg  | chr10:118390754 | c.705G>A              | Missense   | Novel | Negative      | Negative                     |
| P1044 | Male   | 55 | Asian | Chronic pancreatitis | <i>RECQL4</i>   | p.Ala919Thr  | chr8:145738230  | c.2755G>A             | Missense   | VUS   | Negative      | Negative                     |
| P1046 | Female | 15 | Asian | Chronic pancreatitis | <i>ERCC4</i>    | p.Gln5Ter    | chr16:14014035  | c.13C>T               | Nonsense   | Novel | Negative      | Negative                     |
| P1046 | Female | 15 | Asian | Chronic pancreatitis | <i>MLH1</i>     | p.Asp235Val  | chr3:37055949   | c.704A>T              | Missense   | VUS   | Negative      | Negative                     |
| P1050 | Male   | 59 | Asian | IPMN                 | <i>BRCA2</i>    | p.Ile2693Lys | chr13:32937417  | c.8078T>A             | Missense   | VUS   | Negative      | Negative                     |
| P1060 | Female | 60 | Asian | IPMN                 | <i>NOC2L</i>    | p.Arg417Gln  | chr1:887461     | c.1250G>A             | Missense   | Novel | Negative      | Mother with pancreatic tumor |
| P1067 | Male   | 48 | Asian | IPMN                 | <i>CELA3A</i>   | p.Gln176Pro  | chr1:22333893   | c.527A>C              | Missense   | Novel | Negative      | Negative                     |
| P1068 | Male   | 62 | Asian | PNET                 | <i>FANCL</i>    | p.Asp213Asn  | chr2:58392928   | c.637G>A              | Missense   | VUS   | Negative      | Negative                     |
| P1069 | Male   | 71 | Asian | PNET                 | <i>CELA2A</i>   | p.Gly218Arg  | chr1:15793893   | c.652G>A              | Missense   | Novel | Negative      | Negative                     |
| P1077 | Male   | 45 | Asian | IPMN                 | <i>CDH1</i>     | p.Thr623Ala  | chr16:68856059  | c.1867A>G             | Missense   | VUS   | Negative      | Negative                     |
| P1081 | Male   | 64 | Asian | IPMN                 | <i>RECQL4</i>   | p.Leu640Val  | chr8:145739452  | c.1918C>G             | Missense   | Novel | Renal cancer  | Negative                     |

|       |        |    |       |                      |                 |              |                 |                |            |       |          |          |
|-------|--------|----|-------|----------------------|-----------------|--------------|-----------------|----------------|------------|-------|----------|----------|
| P1089 | Male   | 67 | Asian | IPMN                 | <i>CEL</i>      | p.Val123Ile  | chr9:135940444  | c.367G>A       | Missense   | Novel | Negative | Negative |
| P1091 | Male   | 36 | Asian | SPT                  | <i>TNS3</i>     | p.Thr1214Met | chr7:47336715   | c.3641C>T      | Missense   | Novel | Negative | Negative |
| P1094 | Female | 35 | Asian | MCN                  | <i>ARID1A</i>   | p.Arg1658Trp | chr1:27101690   | c.4972C>T      | Missense   | Novel | Negative | Negative |
| P1096 | Female | 55 | Asian | PNET                 | <i>TP53</i>     | p.Ser371Cys  | chr17:7572997   | c.1112C>G      | Missense   | Novel | Negative | Negative |
| P1101 | Female | 26 | Asian | SPT                  | <i>PNLIPRP2</i> | p.Ala145Val  | chr10:118386478 | c.436C>T       | Missense   | Novel | Negative | Negative |
| P1102 | Female | 64 | Asian | IPMN                 | <i>TNS3</i>     | p.Gly187Asp  | chr7:47454718   | c.560G>A       | Missense   | Novel | Negative | Negative |
| P1109 | Female | 77 | Asian | IPMN                 | <i>ERBB2</i>    | p.Ile148fs   | chr17:37865573  | c.442_443insC  | Frameshift | Novel | Negative | Negative |
| P1113 | Male   | 53 | Asian | PDAC                 | <i>RECQL4</i>   | p.Arg715Gln  | chr8:145739011  | c.2144G>A      | Missense   | VUS   | Negative | Negative |
| P1115 | Male   | 63 | Asian | PNET                 | <i>RNF43</i>    | p.Arg668Trp  | chr17:56435135  | c.2002C>T      | Missense   | Novel | Negative | Negative |
| P1117 | Female | 47 | Asian | SPT                  | <i>PALB2</i>    | p.His553Gln  | chr16:23646208  | c.1659C>A      | Missense   | VUS   | Negative | Negative |
| P1120 | Male   | 44 | Asian | PNET                 | <i>PALB2</i>    | p.Thr51Ile   | chr16:23649230  | c.152C>T       | Missense   | VUS   | Negative | Negative |
| P1125 | Female | 13 | Asian | SPT                  | <i>CPB1</i>     | p.Pro313Arg  | chr3:148563370  | c.938C>G       | Missense   | Novel | Negative | Negative |
| P1126 | Female | 25 | Asian | SPT                  | <i>BRCA2</i>    | p.Lys2496Asn | chr13:32930617  | c.7488G>C      | Missense   | VUS   | Negative | Negative |
| P1146 | Female | 54 | Asian | IPMN                 | <i>TNS3</i>     | p.Ser1122Cys | chr7:47342640   | c.3365C>G      | Missense   | Novel | Negative | Negative |
| P1159 | Female | 68 | Asian | PNET                 | <i>ERCC4</i>    | p.Leu27Phe   | chr16:14014101  | c.79C>T        | Missense   | VUS   | Negative | Negative |
| P1168 | Male   | 11 | Asian | SPT                  | <i>CELA3B</i>   | p.Val198Met  | chr1:22310774   | c.592G>A       | Missense   | Novel | Negative | Negative |
| P1173 | Male   | 81 | Asian | Chronic pancreatitis | <i>BRCA2</i>    | p.Gln2345Glu | chr13:32929023  | c.7033C>G      | Missense   | VUS   | Negative | Negative |
| P1173 | Male   | 81 | Asian | Chronic pancreatitis | <i>FANCC</i>    | p.Arg433fs   | chr9:97873775   | c.1297delC     | Frameshift | Novel | Negative | Negative |
| P1180 | Male   | 72 | Asian | IPMN                 | <i>PALB2</i>    | p.Pro117Leu  | chr16:23647517  | c.350C>T       | Missense   | VUS   | Negative | Negative |
| P1183 | Male   | 41 | Asian | PNET                 | <i>BRCA2</i>    | p.Val2010Gly | chr13:32914521  | c.6029T>G      | Missense   | VUS   | Negative | Negative |
| P1186 | Male   | 72 | Asian | Acute pancreatitis   | <i>FANCA</i>    | p.Thr1161Lys | chr16:89813023  | c.3482C>A      | Missense   | Novel | Negative | Negative |
| P1187 | Female | 56 | Asian | PNET                 | <i>BRCA2</i>    | p.Ser1074Cys | chr13:32911712  | c.3220A>T      | Missense   | VUS   | Negative | Negative |
| P1193 | Female | 63 | Asian | PNET                 | <i>ATM</i>      | p.His1895Arg | chr11:108178633 | c.5684A>G      | Missense   | Novel | Negative | Negative |
| P1201 | Male   | 68 | Asian | IPMN                 | <i>BRCA2</i>    | p.Asp651Gly  | chr13:32910444  | c.1952A>G      | Missense   | VUS   | Negative | Negative |
| P1202 | Female | 73 | Asian | IPMN                 | <i>FANCA</i>    | p.Pro759Leu  | chr16:89836614  | c.2276C>T      | Missense   | Novel | Negative | Negative |
| P1203 | Male   | 52 | Asian | Acute pancreatitis   | <i>RNF43</i>    | p.Trp416Ter  | chr17:56435889  | c.1248G>A      | Nonsense   | Novel | Negative | Negative |
| P1208 | Female | 48 | Asian | Acute pancreatitis   | <i>ATM</i>      | p.Val1085Ile | chr11:108143548 | c.3253G>A      | Missense   | Novel | Negative | Negative |
| P1214 | Female | 59 | Asian | Acute pancreatitis   | <i>ARID1A</i>   | p.Pro680Ser  | chr1:27087464   | c.2038C>T      | Missense   | Novel | Negative | Negative |
| P1216 | Male   | 58 | Asian | Acute pancreatitis   | <i>BAP1</i>     | p.Leu294fs   | chr3:52439832   | c.879_880insGC | Frameshift | Novel | Negative | Negative |

|       |        |    |       |                    |               |              |                 |                   |            |       |          |          |
|-------|--------|----|-------|--------------------|---------------|--------------|-----------------|-------------------|------------|-------|----------|----------|
| P1216 | Male   | 58 | Asian | Acute pancreatitis | <i>ERCC4</i>  | p.Val133Leu  | chr16:14020426  | c.397G>C          | Missense   | Novel | Negative | Negative |
| P1226 | Male   | 52 | Asian | Acute pancreatitis | <i>CPBI</i>   | p.Leu93Gln   | chr3:148558478  | c.278T>A          | Missense   | Novel | Negative | Negative |
| P1232 | Male   | 37 | Asian | Acute pancreatitis | <i>MSH6</i>   | p.Pro1087His | chr2:48030646   | c.3260C>A         | Missense   | VUS   | Negative | Negative |
| P1256 | Male   | 14 | Asian | Acute pancreatitis | <i>CTRC</i>   | p.His110Tyr  | chr1:15769040   | c.328C>T          | Missense   | Novel | Negative | Negative |
| P1258 | Female | 82 | Asian | Acute pancreatitis | <i>FANCG</i>  | p.Arg563Gln  | chr9:35074440   | c.1688G>A         | Missense   | VUS   | Negative | Negative |
| P1262 | Female | 64 | Asian | Acute pancreatitis | <i>CPA1</i>   | p.Arg27Gln   | chr7:130020953  | c.80G>A           | Missense   | Novel | Negative | Negative |
| P1262 | Female | 64 | Asian | Acute pancreatitis | <i>TNS3</i>   | p.Gly187Asp  | chr7:47454718   | c.560G>A          | Missense   | Novel | Negative | Negative |
| P1265 | Male   | 20 | Asian | Acute pancreatitis | <i>MSH2</i>   | p.Asp180Val  | chr2:47637405   | c.539A>T          | Missense   | Novel | Negative | Negative |
| P1273 | Male   | 33 | Asian | Acute pancreatitis | <i>BRCA1</i>  | p.Val1675Ala | chr17:41222970  | c.5024T>C         | Missense   | Novel | Negative | Negative |
| P1279 | Male   | 44 | Asian | Acute pancreatitis | <i>XRCC3</i>  | p.Arg174Ter  | chr14:104169551 | c.520C>T          | Nonsense   | Novel | Negative | Negative |
| P1280 | Male   | 73 | Asian | Acute pancreatitis | <i>TNS3</i>   | p.Pro177His  | chr7:47454748   | c.530C>A          | Missense   | Novel | Negative | Negative |
| P1280 | Male   | 73 | Asian | Acute pancreatitis | <i>XRCC3</i>  | p.Lys72fs    | chr14:104173529 | c.214_216delAAG   | Frameshift | Novel | Negative | Negative |
| P1288 | Female | 72 | Asian | Acute pancreatitis | <i>BUB1B</i>  | p.Arg381fs   | chr15:40488828  | c.1141_1142insAAG | Frameshift | Novel | Negative | Negative |
| P1291 | Female | 40 | Asian | Acute pancreatitis | <i>BAP1</i>   | p.Ser489Arg  | chr3:52437696   | c.1465A>C         | Missense   | Novel | Negative | Negative |
| P1291 | Female | 40 | Asian | Acute pancreatitis | <i>TERT</i>   | p.Arg1097fs  | chr5:1254489    | c.3288_3289insG   | Frameshift | Novel | Negative | Negative |
| P1293 | Female | 61 | Asian | Acute pancreatitis | <i>ATM</i>    | p.Lys2749Ile | chr11:108206666 | c.8246A>T         | Missense   | VUS   | Negative | Negative |
| P1293 | Female | 61 | Asian | Acute pancreatitis | <i>FANCA</i>  | p.Cys1159Ser | chr16:89813029  | c.3476G>C         | Missense   | VUS   | Negative | Negative |
| P1295 | Female | 75 | Asian | Acute pancreatitis | <i>BRCA2</i>  | p.Ser353Leu  | chr13:32906673  | c.1058C>T         | Missense   | Novel | Negative | Negative |
| P1295 | Female | 75 | Asian | Acute pancreatitis | <i>CELA2A</i> | p.Gln174Ter  | chr1:15792520   | c.520C>T          | Nonsense   | Novel | Negative | Negative |
| P1306 | Male   | 39 | Asian | Acute pancreatitis | <i>TERT</i>   | p.Thr564Ser  | chr5:1282623    | c.1690A>T         | Missense   | Novel | Negative | Negative |
| P1312 | Female | 52 | Asian | Acute pancreatitis | <i>TP53</i>   | p.Pro72Ala   | chr17:7579473   | c.214C>G          | Missense   | VUS   | Negative | Negative |
| P1313 | Male   | 27 | Asian | Acute pancreatitis | <i>TERT</i>   | p.Thr1098fs  | chr5:1254485    | c.3292_3293insG   | Frameshift | Novel | Negative | Negative |
| P1316 | Male   | 31 | Asian | Acute pancreatitis | <i>ARID1A</i> | p.Gln761fs   | chr1:27088668   | c.2281delC        | Frameshift | Novel | Negative | Negative |

|       |        |    |       |                    |                 |              |                 |                      |            |       |          |          |
|-------|--------|----|-------|--------------------|-----------------|--------------|-----------------|----------------------|------------|-------|----------|----------|
| P1316 | Male   | 31 | Asian | Acute pancreatitis | <i>NOC2L</i>    | p.Arg628Gly  | chr1:881588     | c.1882C>G            | Missense   | Novel | Negative | Negative |
| P1319 | Female | 58 | Asian | Acute pancreatitis | <i>HNF1B</i>    | p.His515Tyr  | chr17:36059192  | c.1543C>T            | Missense   | Novel | Negative | Negative |
| P1323 | Male   | 45 | Asian | Acute pancreatitis | <i>ARID1A</i>   | p.Gly882fs   | chr1:27089687   | c.2643_2644insC      | Frameshift | Novel | Negative | Negative |
| P1323 | Male   | 45 | Asian | Acute pancreatitis | <i>BAP1</i>     | p.Tyr241His  | chr3:52440331   | c.721T>C             | Missense   | Novel | Negative | Negative |
| P1325 | Female | 52 | Asian | Acute pancreatitis | <i>PALB2</i>    | p.Thr710Met  | chr16:23641346  | c.2129C>T            | Missense   | VUS   | Negative | Negative |
| P1327 | Male   | 32 | Asian | Acute pancreatitis | <i>MSH2</i>     | p.Thr552Ser  | chr2:47693941   | c.1655C>G            | Missense   | Novel | Negative | Negative |
| P1329 | Male   | 76 | Asian | Acute pancreatitis | <i>RECQL4</i>   | p.Arg375His  | chr8:145741379  | c.1124G>A            | Missense   | VUS   | Negative | Negative |
| P1331 | Male   | 34 | Asian | Acute pancreatitis | <i>GRP</i>      | p.Met50fs    | chr18:56892726  | c.143_144insT        | Frameshift | Novel | Negative | Negative |
| P1332 | Female | 37 | Asian | Acute pancreatitis | <i>BUB1</i>     | p.Gln144fs   | chr2:111428138  | c.429_430insT        | Frameshift | Novel | Negative | Negative |
| P1333 | Male   | 38 | Asian | Acute pancreatitis | <i>BRCA2</i>    | p.Tyr42Cys   | chr13:32893271  | c.125A>G             | Missense   | VUS   | Negative | Negative |
| P1336 | Male   | 19 | Asian | Acute pancreatitis | <i>BRCA2</i>    | p.Glu2082Lys | chr13:32914736  | c.6244G>A            | Missense   | Novel | Negative | Negative |
| P1338 | Male   | 45 | Asian | Acute pancreatitis | <i>CFTR</i>     | p.Gly1069Arg | chr7:117251700  | c.3205G>A            | Missense   | VUS   | Negative | Negative |
| P1344 | Female | 38 | Asian | Acute pancreatitis | <i>BRCA1</i>    | p.Thr796Ile  | chr17:41245161  | c.2387C>T            | Missense   | VUS   | Negative | Negative |
| P1348 | Male   | 70 | Asian | Acute pancreatitis | <i>CFTR</i>     | p.Lys978fs   | chr7:117246750  | c.2933_2934delA<br>A | Frameshift | Novel | Negative | Negative |
| P1352 | Male   | 45 | Asian | Acute pancreatitis | <i>MSH2</i>     | p.Ser142Leu  | chr2:47637291   | c.425C>T             | Missense   | Novel | Negative | Negative |
| P1355 | Female | 53 | Asian | Acute pancreatitis | <i>PMS2</i>     | p.His435Tyr  | chr7:6027093    | c.1303C>T            | Missense   | VUS   | Negative | Negative |
| P1365 | Male   | 52 | Asian | PDAC               | <i>MLH1</i>     | p.Met342Val  | chr3:37061940   | c.1024A>G            | Missense   | VUS   | Negative | Negative |
| P1369 | Male   | 41 | Asian | Acute pancreatitis | <i>ERBB2</i>    | p.Thr323fs   | chr17:37868244  | c.965_966insC        | Frameshift | Novel | Negative | Negative |
| P1369 | Male   | 41 | Asian | Acute pancreatitis | <i>PNLIPRP2</i> | p.Ile78Thr   | chr10:118385485 | c.235T>C             | Missense   | Novel | Negative | Negative |
| P1376 | Female | 50 | Asian | Acute pancreatitis | <i>TNS3</i>     | p.Pro375Leu  | chr7:47409119   | c.1124C>T            | Missense   | Novel | Negative | Negative |
| P1388 | Female | 68 | Asian | Acute pancreatitis | <i>ATM</i>      | p.Arg785Cys  | chr11:108128310 | c.2353C>T            | Missense   | VUS   | Negative | Negative |
| P1394 | Male   | 64 | Asian | Acute pancreatitis | <i>BRIP1</i>    | p.Gln102Arg  | chr17:59934493  | c.305A>G             | Missense   | VUS   | Negative | Negative |
| P1396 | Female | 63 | Asian | Acute pancreatitis | <i>CELA3A</i>   | p.His187fs   | chr1:22333926   | c.560_561insG        | Frameshift | Novel | Negative | Negative |

|       |        |    |       |                    |                 |              |                 |                       |            |       |                |                            |
|-------|--------|----|-------|--------------------|-----------------|--------------|-----------------|-----------------------|------------|-------|----------------|----------------------------|
| P1396 | Female | 63 | Asian | Acute pancreatitis | <i>CPBI</i>     | p.Ala263fs   | chr3:148563217  | c.785_786insT         | Frameshift | Novel | Negative       | Negative                   |
| P1396 | Female | 63 | Asian | Acute pancreatitis | <i>CTRC</i>     | p.Val180Met  | chr1:15771145   | c.538G>A              | Missense   | Novel | Negative       | Negative                   |
| P1403 | Female | 62 | Asian | PDAC               | <i>CPA1</i>     | p.Gly277Ser  | chr7:130025028  | c.829G>A              | Missense   | Novel | Negative       | Negative                   |
| P1411 | Male   | 59 | Asian | PDAC               | <i>CELA2A</i>   | p.Asn213Lys  | chr1:15792639   | c.639C>G              | Missense   | Novel | Negative       | Negative                   |
| P1413 | Female | 47 | Asian | PDAC               | <i>CPBI</i>     | p.Trp128Cys  | chr3:148558672  | c.384G>C              | Missense   | Novel | Negative       | Negative                   |
| P1415 | Male   | 78 | Asian | PDAC               | <i>RAD51C</i>   | p.Tyr216His  | chr17:56780631  | c.646T>C              | Missense   | Novel | Negative       | Negative                   |
| P1416 | Male   | 61 | Asian | PDAC               | <i>PMS2</i>     | p.Ile144Asn  | chr7:6042190    | c.431T>A              | Missense   | Novel | Negative       | Negative                   |
| P1418 | Male   | 61 | Asian | PDAC               | <i>FANCA</i>    | p.Pro799Ser  | chr16:89836354  | c.2395C>T             | Missense   | VUS   | Negative       | Negative                   |
| P1420 | Female | 67 | Asian | PDAC               | <i>FANCA</i>    | p.Pro799Ser  | chr16:89836354  | c.2395C>T             | Missense   | VUS   | Negative       | Negative                   |
| P1426 | Female | 63 | Asian | PDAC               | <i>FANCA</i>    | p.Pro799Ser  | chr16:89836354  | c.2395C>T             | Missense   | VUS   | Negative       | Negative                   |
| P1428 | Female | 60 | Asian | PDAC               | <i>FANCA</i>    | p.Pro799Ser  | chr16:89836354  | c.2395C>T             | Missense   | VUS   | Negative       | Negative                   |
| P1435 | Female | 41 | Asian | PDAC               | <i>BRIP1</i>    | p.Asn643Ile  | chr17:59857629  | c.1928A>T             | Missense   | Novel | Negative       | Negative                   |
| P1439 | Male   | 54 | Asian | PDAC               | <i>CDH1</i>     | p.Val391Ile  | chr16:68847249  | c.1171G>A             | Missense   | VUS   | Negative       | Negative                   |
| P1440 | Male   | 68 | Asian | PDAC               | <i>MSH6</i>     | p.Ala1127Thr | chr2:48030765   | c.3379G>A             | Missense   | VUS   | Negative       | Negative                   |
| P1442 | Female | 62 | Asian | PDAC               | <i>BRCA1</i>    | p.Glu1815Lys | chr17:41201164  | c.5443G>A             | Missense   | Novel | Negative       | Negative                   |
| P1443 | Female | 61 | Asian | PDAC               | <i>CTRC</i>     | p.Arg119His  | chr1:15769068   | c.356G>A              | Missense   | VUS   | Negative       | Negative                   |
| P1450 | Male   | 67 | Asian | PDAC               | <i>ATM</i>      | p.Val2166Ala | chr11:108192072 | c.6497T>C             | Missense   | VUS   | Negative       | Negative                   |
| P1456 | Male   | 63 | Asian | PDAC               | <i>ARID1A</i>   | p.Val973Ile  | chr1:27092986   | c.2917G>A             | Missense   | Novel | Negative       | Negative                   |
| P1461 | Female | 68 | Asian | PDAC               | <i>MLH1</i>     | p.Asp428Gly  | chr3:37067372   | c.1283A>G             | Missense   | Novel | Negative       | Negative                   |
| P1463 | Male   | 71 | Asian | PDAC               | <i>MSH2</i>     | p.Thr8Ser    | chr2:47630352   | c.22A>T               | Missense   | VUS   | Negative       | Negative                   |
| P1464 | Male   | 74 | Asian | PDAC               | <i>BRCA2</i>    | p.Gly904Glu  | chr13:32911203  | c.2711G>A             | Missense   | VUS   | Negative       | Negative                   |
| P1465 | Female | 75 | Asian | PDAC               | <i>ERBB2</i>    | p.Glu40Lys   | chr17:37863287  | c.118G>A              | Missense   | Novel | Negative       | Negative                   |
| P1473 | Male   | 55 | Asian | PDAC               | <i>PNLIPRP2</i> | p.Gly276Ser  | chr10:118394360 | c.828G>A              | Missense   | Novel | Negative       | Negative                   |
| P1473 | Male   | 55 | Asian | PDAC               | <i>BRCA2</i>    | p.Gln1502Arg | chr13:32912997  | c.4505A>G             | Missense   | VUS   | Negative       | Negative                   |
| P1475 | Female | 55 | Asian | Ampullary cancer   | <i>BRCA2</i>    | p.Ser1479Asn | chr13:32912928  | c.4436G>A             | Missense   | Novel | Negative       | Negative                   |
| P1477 | Female | 58 | Asian | PDAC               | <i>SPINK1</i>   | p.Lys31fs    | chr5:147207677  | c.93_101delATG TTACAA | Frameshift | Novel | Negative       | Negative                   |
| P1492 | Female | 56 | Asian | PDAC               | <i>RECQL4</i>   | p.Gly351Ser  | chr8:145741452  | c.1051G>A             | Missense   | Novel | Negative       | Negative                   |
| P1501 | Male   | 65 | Asian | PDAC               | <i>STK11</i>    | p.Arg147His  | chr19:1219388   | c.440G>A              | Missense   | VUS   | Negative       | Father with gastric cancer |
| P1504 | Female | 61 | Asian | PDAC               | <i>STK11</i>    | p.Arg211Trp  | chr19:1220613   | c.631C>T              | Missense   | VUS   | Gastric cancer | Negative                   |

|       |        |    |       |      |                 |              |                 |                          |            |       |          |                            |
|-------|--------|----|-------|------|-----------------|--------------|-----------------|--------------------------|------------|-------|----------|----------------------------|
| P1508 | Male   | 69 | Asian | PDAC | <i>PALB2</i>    | p.Cys520fs   | chr16:23646309  | c.1557_1558insA          | Frameshift | Novel | Negative | Negative                   |
| P1509 | Male   | 63 | Asian | PDAC | <i>PNLIPRP2</i> | p.Thr448Asn  | chr10:118401790 | c.1345C>A                | Missense   | Novel | Negative | Negative                   |
| P1515 | Male   | 67 | Asian | PDAC | <i>BUB1B</i>    | p.Val551fs   | chr15:40494811  | c.1650_1651insC          | Frameshift | Novel | Negative | Negative                   |
| P1516 | Male   | 67 | Asian | PDAC | <i>CDH1</i>     | p.Gly434Val  | chr16:68847379  | c.1301G>T                | Missense   | Novel | Negative | Negative                   |
| P1516 | Male   | 67 | Asian | PDAC | <i>CPBI</i>     | p.Phe232fs   | chr3:148562469  | c.693_694insC            | Frameshift | Novel | Negative | Negative                   |
| P1517 | Male   | 55 | Asian | PDAC | <i>BRCA1</i>    | p.Glu1053Asp | chr17:41244389  | c.3159A>C                | Missense   | VUS   | Negative | Negative                   |
| P1517 | Male   | 55 | Asian | PDAC | <i>MSH6</i>     | p.Asn1327Ser | chr2:48033769   | c.3980A>G                | Missense   | VUS   | Negative | Negative                   |
| P1519 | Male   | 54 | Asian | PDAC | <i>BAP1</i>     | p.Ile131fs   | chr3:52441461   | c.390_391insC            | Frameshift | Novel | Negative | Negative                   |
| P1521 | Male   | 57 | Asian | PDAC | <i>ERCC4</i>    | p.Ile634Val  | chr16:14031711  | c.1900A>G                | Missense   | Novel | Negative | Negative                   |
| P1523 | Female | 47 | Asian | PDAC | <i>FANCA</i>    | p.Gly122fs   | chr16:89877397  | c.365delG                | Frameshift | Novel | Negative | Negative                   |
| P1523 | Female | 47 | Asian | PDAC | <i>TNS3</i>     | p.Phe1134Leu | chr7:47342605   | c.3400T>C                | Missense   | Novel | Negative | Negative                   |
| P1523 | Female | 47 | Asian | PDAC | <i>RECQL4</i>   | p.Tyr519fs   | chr8:145740384  | c.1555_1556insC          | Frameshift | Novel | Negative | Negative                   |
| P1529 | Female | 61 | Asian | PDAC | <i>ARID1A</i>   | p.Pro1326fs  | chr1:27100181   | c.4001_4002insG<br>CAGCA | Frameshift | Novel | Negative | Negative                   |
| P1530 | Female | 63 | Asian | PDAC | <i>ARID1A</i>   | p.Gly2040Arg | chr1:27106507   | c.6118G>A                | Missense   | Novel | Negative | Negative                   |
| P1537 | Male   | 62 | Asian | PDAC | <i>PNLIPRP2</i> | p.Ile78Thr   | chr10:118385485 | c.235T>C                 | Missense   | Novel | Negative | Negative                   |
| P1537 | Male   | 62 | Asian | PDAC | <i>BUB1B</i>    | p.Asp547fs   | chr15:40494799  | c.1638_1639insC          | Frameshift | Novel | Negative | Negative                   |
| P1540 | Female | 66 | Asian | PDAC | <i>PNLIPRP2</i> | p.Phe345fs   | chr10:118396388 | c.1036delT               | Frameshift | Novel | Negative | Negative                   |
| P1543 | Male   | 76 | Asian | PDAC | <i>BAP1</i>     | p.Leu334fs   | chr3:52439240   | c.1001_1002insC<br>CT    | Frameshift | Novel | Negative | Negative                   |
| P1554 | Male   | 43 | Asian | PDAC | <i>BRCA1</i>    | p.Thr1119Ser | chr17:41244192  | c.3356C>G                | Missense   | VUS   | Negative | Negative                   |
| P1564 | Male   | 58 | Asian | PDAC | <i>CTRC</i>     | p.Arg83Pro   | chr1:15768960   | c.248G>C                 | Missense   | Novel | Negative | Negative                   |
| P1565 | Male   | 47 | Asian | PDAC | <i>ATM</i>      | p.Gln95Lys   | chr11:108100002 | c.283C>A                 | Missense   | VUS   | Negative | Negative                   |
| P1572 | Male   | 58 | Asian | PDAC | <i>MLH1</i>     | p.Gly232Arg  | chr3:37055939   | c.694G>C                 | Missense   | Novel | Negative | Negative                   |
| P1573 | Male   | 65 | Asian | PDAC | <i>ATM</i>      | p.Asp1467Glu | chr11:108160493 | c.4401C>G                | Missense   | Novel | Negative | Negative                   |
| P1574 | Male   | 68 | Asian | PDAC | <i>RNF43</i>    | p.Leu647fs   | chr17:56435197  | c.1939_1940insA          | Frameshift | Novel | Negative | Negative                   |
| P1577 | Male   | 70 | Asian | PDAC | <i>BRCA2</i>    | p.Glu3316fs  | chr13:32972594  | c.9946_9947delG<br>A     | Frameshift | Novel | Negative | Negative                   |
| P1583 | Female | 66 | Asian | PDAC | <i>ATM</i>      | p.Thr72Ala   | chr11:108099933 | c.214A>G                 | Missense   | Novel | Negative | Negative                   |
| P1583 | Female | 66 | Asian | PDAC | <i>TERT</i>     | p.Ala437fs   | chr5:1293693    | c.1307_1308insC          | Frameshift | Novel | Negative | Negative                   |
| P1595 | Female | 62 | Asian | PDAC | <i>NOC2L</i>    | p.Ala179Gly  | chr1:891546     | c.536C>G                 | Missense   | Novel | Negative | Negative                   |
| P1604 | Female | 49 | Asian | PNET | <i>BRCA1</i>    | p.Phe1498Tyr | chr17:41228559  | c.4493T>A                | Missense   | Novel | Negative | Mother with gastric cancer |



|       |        |    |       |      |                 |              |                 |                       |            |       |          |                                                      |
|-------|--------|----|-------|------|-----------------|--------------|-----------------|-----------------------|------------|-------|----------|------------------------------------------------------|
| P1604 | Female | 49 | Asian | PNET | <i>RNF43</i>    | p.Arg554Trp  | chr17:56435477  | c.1660C>T             | Missense   | Novel | Negative | Mother with gastric cancer                           |
| P1606 | Female | 76 | Asian | PDAC | <i>CTRC</i>     | p.Thr58Met   | chr1:15767029   | c.173C>T              | Missense   | Novel | Negative | Negative                                             |
| P1608 | Female | 77 | Asian | PDAC | <i>MLH1</i>     | p.Val213Leu  | chr3:37053550   | c.637G>T              | Missense   | VUS   | Negative | Negative                                             |
| P1611 | Male   | 66 | Asian | PDAC | <i>ARID1A</i>   | p.Gln1358Pro | chr1:27100361   | c.4073A>C             | Missense   | Novel | Negative | Negative                                             |
| P1611 | Male   | 66 | Asian | PDAC | <i>BRCA2</i>    | p.Leu1059Met | chr13:32911667  | c.3175C>A             | Missense   | Novel | Negative | Negative                                             |
| P1611 | Male   | 66 | Asian | PDAC | <i>BRCA2</i>    | p.Thr2564Ile | chr13:32931952  | c.7691C>T             | Missense   | VUS   | Negative | Negative                                             |
| P1612 | Male   | 74 | Asian | PDAC | <i>CDKN2A</i>   | p.Pro41Gln   | chr9:21974705   | c.122C>A              | Missense   | VUS   | Negative | Negative                                             |
| P1620 | Male   | 47 | Asian | PDAC | <i>ATM</i>      | p.Asp7fs     | chr11:108098367 | c.19_21delGAT         | Frameshift | Novel | Negative | Negative                                             |
| P1643 | Male   | 59 | Asian | PDAC | <i>CLPS</i>     | p.Thr70Met   | chr6:35763053   | c.209C>T              | Missense   | Novel | Negative | Negative                                             |
| P1644 | Male   | 65 | Asian | PDAC | <i>ATM</i>      | p.Ile2865Val | chr11:108218014 | c.8593A>G             | Missense   | VUS   | Negative | Negative                                             |
| P1644 | Male   | 65 | Asian | PDAC | <i>MSH6</i>     | p.Tyr397Cys  | chr2:48026312   | c.1190A>G             | Missense   | VUS   | Negative | Negative                                             |
| P1646 | Male   | 61 | Asian | PDAC | <i>CPA1</i>     | p.Arg240Gln  | chr7:130024399  | c.719G>A              | Missense   | Novel | Negative | Negative                                             |
| P1650 | Male   | 43 | Asian | PDAC | <i>CFTR</i>     | p.Gly1237Asp | chr7:117267817  | c.3710G>A             | Missense   | VUS   | Negative | Negative                                             |
| P1652 | Female | 72 | Asian | PDAC | <i>FANCA</i>    | p.Cys1159Ser | chr16:89813029  | c.3476G>C             | Missense   | VUS   | Negative | Father with gastric cancer, mother with colon cancer |
| P1655 | Male   | 34 | Asian | PDAC | <i>PNLIPRP2</i> | p.Ala145Val  | chr10:118386478 | c.436C>T              | Missense   | Novel | Negative | Negative                                             |
| P1655 | Male   | 34 | Asian | PDAC | <i>WEE1</i>     | p.Met267fs   | chr11:9597791   | c.797_798insT         | Frameshift | Novel | Negative | Negative                                             |
| P1656 | Male   | 54 | Asian | PDAC | <i>PNLIPRP2</i> | p.Ala305Val  | chr10:118394448 | c.916C>T              | Missense   | Novel | Negative | Negative                                             |
| P1657 | Male   | 56 | Asian | PDAC | <i>STK11</i>    | p.Arg211Trp  | chr19:1220613   | c.631C>T              | Missense   | VUS   | Negative | Negative                                             |
| P1659 | Male   | 51 | Asian | PDAC | <i>ARID1A</i>   | p.Ala163fs   | chr1:27023380   | c.494_502delCGGCCGCCG | Frameshift | Novel | Negative | Negative                                             |
| P1661 | Male   | 59 | Asian | PDAC | <i>CTRB2</i>    | p.Gln220Ter  | chr16:75238193  | c.658C>T              | Nonsense   | Novel | Negative | Father with gastric cancer                           |
| P1662 | Female | 48 | Asian | PDAC | <i>PLA2G1B</i>  | p.Val24Met   | chr12:120763788 | c.70G>A               | Missense   | Novel | Negative | Negative                                             |
| P1663 | Female | 59 | Asian | PDAC | <i>CTRB1</i>    | p.Gly18Arg   | chr16:75252957  | c.52G>C               | Missense   | Novel | Negative | Negative                                             |
| P1664 | Female | 64 | Asian | PDAC | <i>PNLIPRP2</i> | p.Gly276Ser  | chr10:118394360 | c.828G>A              | Missense   | Novel | Negative | Negative                                             |
| P1665 | Male   | 64 | Asian | PDAC | <i>ATM</i>      | p.Lys385Glu  | chr11:108119747 | c.1153A>G             | Missense   | Novel | Negative | Negative                                             |
| P1666 | Female | 48 | Asian | PDAC | <i>RECQLA</i>   | p.Ser445fs   | chr8:145740767  | c.1332_1333insC       | Frameshift | Novel | Negative | Negative                                             |

|       |        |    |       |      |               |              |                 |                   |            |       |          |                          |
|-------|--------|----|-------|------|---------------|--------------|-----------------|-------------------|------------|-------|----------|--------------------------|
| P1671 | Male   | 78 | Asian | PDAC | <i>PALB2</i>  | p.Asp1141Asn | chr16:23614920  | c.3421G>A         | Missense   | VUS   | Negative | Brother with lung cancer |
| P1679 | Male   | 56 | Asian | PDAC | <i>ATM</i>    | p.Gly2287Arg | chr11:108196836 | c.6859G>A         | Missense   | VUS   | Negative | Negative                 |
| P1679 | Male   | 56 | Asian | PDAC | <i>ERBB2</i>  | p.Val308Met  | chr17:37868201  | c.922G>A          | Missense   | Novel | Negative | Negative                 |
| P1680 | Male   | 56 | Asian | PDAC | <i>FANCA</i>  | p.Pro799Ser  | chr16:89836354  | c.2395C>T         | Missense   | VUS   | Negative | Negative                 |
| P1681 | Male   | 66 | Asian | PDAC | <i>STK11</i>  | p.Ala273Val  | chr19:1221295   | c.818C>T          | Missense   | Novel | Negative | Negative                 |
| P1683 | Female | 47 | Asian | PDAC | <i>STK11</i>  | p.Arg384Gln  | chr19:1226495   | c.1151G>A         | Missense   | VUS   | Negative | Negative                 |
| P1683 | Female | 47 | Asian | PDAC | <i>BUB1</i>   | p.Tyr853Cys  | chr2:111399286  | c.2558A>G         | Missense   | Novel | Negative | Negative                 |
| P1693 | Female | 50 | Asian | PDAC | <i>GRP</i>    | p.Gln70fs    | chr18:56892793  | c.209_210delAG    | Frameshift | Novel | Negative | Negative                 |
| P1694 | Male   | 76 | Asian | PDAC | <i>CPBI</i>   | p.Tyr197His  | chr3:148562277  | c.589T>C          | Missense   | Novel | Negative | Negative                 |
| P1694 | Male   | 76 | Asian | PDAC | <i>CLPS</i>   | p.Thr85Asn   | chr6:35763008   | c.254C>A          | Missense   | Novel | Negative | Negative                 |
| P1695 | Male   | 43 | Asian | PDAC | <i>MSH6</i>   | p.Pro1073Arg | chr2:48030604   | c.3218C>G         | Missense   | VUS   | Negative | Negative                 |
| P1696 | Male   | 49 | Asian | PNET | <i>TERT</i>   | p.Arg1097fs  | chr5:1254489    | c.3288_3289insG   | Frameshift | Novel | Negative | Negative                 |
| P1704 | Female | 59 | Asian | PDAC | <i>TNS3</i>   | p.Arg1365Lys | chr7:47323298   | c.4094G>A         | Missense   | Novel | Negative | Negative                 |
| P1706 | Male   | 59 | Asian | PDAC | <i>MLH1</i>   | p.Leu266Arg  | chr3:37059003   | c.797T>G          | Missense   | VUS   | Negative | Negative                 |
| P1707 | Male   | 76 | Asian | PDAC | <i>MSH6</i>   | p.Lys804Thr  | chr2:48027533   | c.2411A>C         | Missense   | VUS   | Negative | Negative                 |
| P1708 | Male   | 43 | Asian | PDAC | <i>ARID1A</i> | p.Tyr430Cys  | chr1:27056293   | c.1289A>G         | Missense   | Novel | Negative | Negative                 |
| P1711 | Male   | 67 | Asian | PDAC | <i>CELA3A</i> | p.His187fs   | chr1:22333926   | c.560_561insG     | Frameshift | Novel | Negative | Negative                 |
| P1711 | Male   | 67 | Asian | PDAC | <i>FANCA</i>  | p.Arg661fs   | chr16:89839713  | c.1979_1980insC   | Frameshift | Novel | Negative | Negative                 |
| P1712 | Female | 52 | Asian | PDAC | <i>CELA3B</i> | p.Tyr81Ter   | chr1:22307546   | c.243C>A          | Nonsense   | Novel | Negative | Negative                 |
| P1717 | Male   | 71 | Asian | PDAC | <i>AMY2A</i>  | p.Pro49Leu   | chr1:104160208  | c.146C>T          | Missense   | Novel | Negative | Negative                 |
| P1717 | Male   | 71 | Asian | PDAC | <i>ATM</i>    | p.Thr2853Met | chr11:108216609 | c.8558C>T         | Missense   | VUS   | Negative | Negative                 |
| P1719 | Female | 58 | Asian | PDAC | <i>ERCC4</i>  | p.Arg483fs   | chr16:14029234  | c.1448_1450delGAA | Frameshift | Novel | Negative | Negative                 |
| P1720 | Female | 71 | Asian | PDAC | <i>ERCC4</i>  | p.Glu17Ala   | chr16:14014072  | c.50A>C           | Missense   | Novel | Negative | Negative                 |
| P1720 | Female | 71 | Asian | PDAC | <i>BRIP1</i>  | p.Lys752Gln  | chr17:59821796  | c.2254A>C         | Missense   | VUS   | Negative | Negative                 |
| P1722 | Male   | 49 | Asian | PDAC | <i>ATM</i>    | p.Ile2185Thr | chr11:108192129 | c.6554T>C         | Missense   | VUS   | Negative | Negative                 |
| P1722 | Male   | 49 | Asian | PDAC | <i>RECQL4</i> | p.Arg125fs   | chr8:145742131  | c.371_372insGC    | Frameshift | Novel | Negative | Negative                 |
| P1726 | Female | 60 | Asian | PDAC | <i>WEE1</i>   | p.Ile550Ser  | chr11:9608265   | c.1649T>G         | Missense   | Novel | Negative | Negative                 |
| P1727 | Female | 45 | Asian | PDAC | <i>FANCC</i>  | p.Thr503Met  | chr9:97869373   | c.1508C>T         | Missense   | VUS   | Negative | Negative                 |
| P1729 | Male   | 46 | Asian | PDAC | <i>CELA3A</i> | p.Trp193Ter  | chr1:22333945   | c.579G>A          | Nonsense   | Novel | Negative | Negative                 |
| P1731 | Male   | 60 | Asian | PDAC | <i>RAD51C</i> | p.Thr78Ile   | chr17:56772379  | c.233C>T          | Missense   | VUS   | Negative | Negative                 |
| P1732 | Male   | 61 | Asian | PDAC | <i>BUB1</i>   | p.Gln144fs   | chr2:111428138  | c.429_430insT     | Frameshift | Novel | Negative | Negative                 |

|       |        |    |       |                      |                |             |                 |                   |            |       |          |          |
|-------|--------|----|-------|----------------------|----------------|-------------|-----------------|-------------------|------------|-------|----------|----------|
| P1732 | Male   | 61 | Asian | PDAC                 | <i>TERT</i>    | p.Thr1098fs | chr5:1254485    | c.3292_3293insG   | Frameshift | Novel | Negative | Negative |
| P1732 | Male   | 61 | Asian | PDAC                 | <i>RECQL4</i>  | p.Leu828Gln | chr8:145738502  | c.2483T>A         | Missense   | Novel | Negative | Negative |
| P1739 | Male   | 17 | Asian | Acute pancreatitis   | <i>ATM</i>     | p.Leu606Phe | chr11:108123557 | c.1816C>T         | Missense   | Novel | Negative | Negative |
| P1740 | Female | 55 | Asian | Acute pancreatitis   | <i>ERCC4</i>   | p.Arg468fs  | chr16:14029187  | c.1402_1403insA   | Frameshift | Novel | Negative | Negative |
| P1740 | Female | 55 | Asian | Acute pancreatitis   | <i>MSH6</i>    | p.Arg721Gly | chr2:48027283   | c.2161A>G         | Missense   | VUS   | Negative | Negative |
| P1745 | Female | 80 | Asian | Acute pancreatitis   | <i>PALB2</i>   | p.Arg663Cys | chr16:23641488  | c.1987C>T         | Missense   | VUS   | Negative | Negative |
| P1747 | Male   | 44 | Asian | Acute pancreatitis   | <i>CFTR</i>    | p.Ile507Asn | chr7:117199645  | c.1520T>A         | Missense   | Novel | Negative | Negative |
| P1749 | Male   | 39 | Asian | Acute pancreatitis   | <i>NOC2L</i>   | p.Thr616fs  | chr1:881625     | c.1844_1845insT   | Frameshift | Novel | Negative | Negative |
| P1765 | Female | 81 | Asian | Acute pancreatitis   | <i>PALB2</i>   | p.Ala245Ser | chr16:23647134  | c.733G>T          | Missense   | Novel | Negative | Negative |
| P1766 | Male   | 65 | Asian | Acute pancreatitis   | <i>CPBI</i>    | p.Arg152Cys | chr3:148558742  | c.454C>T          | Missense   | Novel | Negative | Negative |
| P1769 | Female | 58 | Asian | Acute pancreatitis   | <i>ARID1A</i>  | p.Leu2053fs | chr1:27106545   | c.6156_6157insA   | Frameshift | Novel | Negative | Negative |
| P1769 | Female | 58 | Asian | Acute pancreatitis   | <i>ARID1A</i>  | p.Asp1975fs | chr1:27106310   | c.5923delG        | Frameshift | Novel | Negative | Negative |
| P1775 | Male   | 21 | Asian | Acute pancreatitis   | <i>MSH6</i>    | p.Thr1175fs | chr2:48032133   | c.3523_3525delACT | Frameshift | Novel | Negative | Negative |
| P1776 | Female | 60 | Asian | Acute pancreatitis   | <i>ARID1A</i>  | p.Arg727Gln | chr1:27087893   | c.2180G>A         | Missense   | Novel | Negative | Negative |
| P1776 | Female | 60 | Asian | Acute pancreatitis   | <i>BUB1</i>    | p.Glu192fs  | chr2:111425418  | c.575_576insT     | Frameshift | Novel | Negative | Negative |
| P1778 | Male   | 70 | Asian | Chronic pancreatitis | <i>CFTR</i>    | p.Ile371Thr | chr7:117180396  | c.1112T>C         | Missense   | Novel | Negative | Negative |
| P1787 | Male   | 35 | Asian | Acute pancreatitis   | <i>ERBB2</i>   | p.Trp482Arg | chr17:37872123  | c.1444T>C         | Missense   | Novel | Negative | Negative |
| P1793 | Male   | 49 | Asian | Acute pancreatitis   | <i>BRCA2</i>   | p.Asn404Ser | chr13:32906826  | c.1211A>G         | Missense   | VUS   | Negative | Negative |
| P1793 | Male   | 49 | Asian | Acute pancreatitis   | <i>CPA1</i>    | p.Arg27Gln  | chr7:130020953  | c.80G>A           | Missense   | Novel | Negative | Negative |
| P1801 | Male   | 60 | Asian | Acute pancreatitis   | <i>CELA2A</i>  | p.Val196Met | chr1:15792586   | c.586G>A          | Missense   | Novel | Negative | Negative |
| P1805 | Male   | 90 | Asian | Acute pancreatitis   | <i>RNF43</i>   | p.Arg668Trp | chr17:56435135  | c.2002C>T         | Missense   | Novel | Negative | Negative |
| P1808 | Male   | 52 | Asian | Acute pancreatitis   | <i>ATM</i>     | p.Asp840Gly | chr11:108137950 | c.2519A>G         | Missense   | Novel | Negative | Negative |
| P1808 | Male   | 52 | Asian | Acute pancreatitis   | <i>PLA2G1B</i> | p.Gly55fs   | chr12:120763693 | c.164delG         | Frameshift | Novel | Negative | Negative |

|       |        |    |       |                      |               |              |                 |                   |            |       |          |          |
|-------|--------|----|-------|----------------------|---------------|--------------|-----------------|-------------------|------------|-------|----------|----------|
| P1821 | Male   | 54 | Asian | Acute pancreatitis   | <i>ARID1A</i> | p.His1581fs  | chr1:27101457   | c.4739_4740insC   | Frameshift | Novel | Negative | Negative |
| P1821 | Male   | 54 | Asian | Acute pancreatitis   | <i>CDKN2A</i> | p.Gly45Arg   | chr9:21974694   | c.133G>C          | Missense   | VUS   | Negative | Negative |
| P1829 | Male   | 48 | Asian | PNET                 | <i>ATM</i>    | p.Pro1112Ser | chr11:108150267 | c.3334C>T         | Missense   | VUS   | Negative | Negative |
| P1831 | Male   | 68 | Asian | PDAC                 | <i>FANCC</i>  | p.Val379Gly  | chr9:97876929   | c.1136T>G         | Missense   | Novel | Negative | Negative |
| P1838 | Male   | 57 | Asian | PDAC                 | <i>BRCA2</i>  | p.Ser1442Leu | chr13:32912817  | c.4325C>T         | Missense   | Novel | Negative | Negative |
| P1838 | Male   | 57 | Asian | PDAC                 | <i>FANCA</i>  | p.Cys1159Ser | chr16:89813029  | c.3476G>C         | Missense   | VUS   | Negative | Negative |
| P1839 | Male   | 58 | Asian | Acute pancreatitis   | <i>RECQL4</i> | p.Val678Met  | chr8:145739338  | c.2032G>A         | Missense   | VUS   | Negative | Negative |
| P1840 | Male   | 52 | Asian | Duodenal carcinoma   | <i>BRIP1</i>  | p.Lys995Glu  | chr17:59761424  | c.2983A>G         | Missense   | VUS   | Negative | Negative |
| P1840 | Male   | 52 | Asian | Duodenal carcinoma   | <i>BRIP1</i>  | p.Arg419Gln  | chr17:59876545  | c.1256G>A         | Missense   | VUS   | Negative | Negative |
| P1841 | Female | 42 | Asian | Acute pancreatitis   | <i>ATM</i>    | p.Asp2889Val | chr11:108218087 | c.8666A>T         | Missense   | Novel | Negative | Negative |
| P1844 | Male   | 49 | Asian | SCN                  | <i>NOC2L</i>  | p.Leu412Phe  | chr1:887477     | c.1234C>T         | Missense   | Novel | Negative | Negative |
| P1849 | Male   | 82 | Asian | Acute pancreatitis   | <i>RAD51C</i> | p.Arg370Ter  | chr17:56811560  | c.1108C>T         | Nonsense   | VUS   | Negative | Negative |
| P1852 | Male   | 11 | Asian | Acute pancreatitis   | <i>BUB1B</i>  | p.Ser788fs   | chr15:40502386  | c.2363_2364delCT  | Frameshift | Novel | Negative | Negative |
| P1864 | Female | 67 | Asian | IPMN                 | <i>CTRB1</i>  | p.Gly18Arg   | chr16:75252957  | c.52G>C           | Missense   | Novel | Negative | Negative |
| P1865 | Male   | 75 | Asian | Chronic pancreatitis | <i>RECQL4</i> | p.Ala550Glu  | chr8:145739881  | c.1649C>A         | Missense   | Novel | Negative | Negative |
| P1867 | Male   | 44 | Asian | Chronic pancreatitis | <i>CPA1</i>   | p.Arg169Cys  | chr7:130023253  | c.505C>T          | Missense   | Novel | Negative | Negative |
| P1871 | Male   | 59 | Asian | Ampullary cancer     | <i>CPA1</i>   | p.Glu328Ala  | chr7:130025182  | c.983A>C          | Missense   | Novel | Negative | Negative |
| P1880 | Female | 34 | Asian | SPT                  | <i>CEL</i>    | p.Ala489Gly  | chr9:135946018  | c.1466C>G         | Missense   | Novel | Negative | Negative |
| P1886 | Male   | 61 | Asian | Chronic pancreatitis | <i>PMS2</i>   | p.Lys581Glu  | chr7:6026655    | c.1741A>G         | Missense   | Novel | Negative | Negative |
| P1890 | Female | 26 | Asian | GIST                 | <i>BRCA1</i>  | p.Gly1319Ser | chr17:41243593  | c.3955G>A         | Missense   | VUS   | Negative | Negative |
| P1892 | Male   | 76 | Asian | Chronic pancreatitis | <i>CLPS</i>   | p.Arg22Gln   | chr6:35765000   | c.65G>A           | Missense   | Novel | Negative | Negative |
| P1907 | Female | 42 | Asian | Acute pancreatitis   | <i>ATM</i>    | p.Ser2165Pro | chr11:108192068 | c.6493T>C         | Missense   | Novel | Negative | Negative |
| P1910 | Male   | 62 | Asian | IPMN                 | <i>RAD51B</i> | p.Thr256Met  | chr14:68758611  | c.767C>T          | Missense   | Novel | Negative | Negative |
| P1918 | Female | 37 | Asian | MCN                  | <i>MSH6</i>   | p.Ala53Asp   | chr2:48010530   | c.158C>A          | Missense   | VUS   | Negative | Negative |
| P1918 | Female | 37 | Asian | MCN                  | <i>MSH6</i>   | p.Gly56fs    | chr2:48010538   | c.177_178insAGGCC | Frameshift | VUS   | Negative | Negative |
| P1918 | Female | 37 | Asian | MCN                  | <i>ATM</i>    | p.Glu2818Ala | chr11:108216504 | c.8453A>C         | Missense   | Novel | Negative | Negative |

|       |        |    |       |                      |               |              |                 |                   |            |       |              |          |
|-------|--------|----|-------|----------------------|---------------|--------------|-----------------|-------------------|------------|-------|--------------|----------|
| P1930 | Male   | 58 | Asian | Chronic pancreatitis | <i>CTRB2</i>  | p.Leu217Pro  | chr16:75238201  | c.650T>C          | Missense   | Novel | Negative     | Negative |
| P1945 | Female | 69 | Asian | PDAC                 | <i>ATM</i>    | p.His943Arg  | chr11:108139326 | c.2828A>G         | Missense   | Novel | Colon cancer | Negative |
| P1946 | Male   | 54 | Asian | IPMN                 | <i>FANCA</i>  | p.Pro799Ser  | chr16:89836354  | c.2395C>T         | Missense   | VUS   | Negative     | Negative |
| P1951 | Male   | 57 | Asian | SCN                  | <i>TNS3</i>   | p.Ile1183Val | chr7:47336809   | c.3547A>G         | Missense   | Novel | Negative     | Negative |
| P1956 | Male   | 47 | Asian | Chronic pancreatitis | <i>BRCA2</i>  | p.Lys1765Gln | chr13:32913785  | c.5293A>C         | Missense   | Novel | Negative     | Negative |
| P1967 | Male   | 47 | Asian | Cholangiocarcinoma   | <i>GRP</i>    | p.Arg141fs   | chr18:56897667  | c.422_425delGGAA  | Frameshift | Novel | Negative     | Negative |
| P1980 | Male   | 63 | Asian | Cholangiocarcinoma   | <i>STK11</i>  | p.Phe264Leu  | chr19:1221269   | c.792T>A          | Missense   | Novel | Negative     | Negative |
| P1991 | Female | 44 | Asian | Duodenal carcinoma   | <i>BRCA2</i>  | p.Glu2420fs  | chr13:32929248  | c.7259_7260insGAA | Frameshift | Novel | Negative     | Negative |
| P1996 | Female | 47 | Asian | Ampullary cancer     | <i>MLH1</i>   | p.His518Arg  | chr3:37070418   | c.1553A>G         | Missense   | VUS   | Negative     | Negative |
| P2001 | Male   | 36 | Asian | Chronic pancreatitis | <i>BRIP1</i>  | p.Asn775Ser  | chr17:59820429  | c.2324A>G         | Missense   | VUS   | Negative     | Negative |
| P2002 | Female | 59 | Asian | SCN                  | <i>ARID1A</i> | p.Lys1007fs  | chr1:27094312   | c.3020_3021insC   | Frameshift | Novel | Negative     | Negative |
| P2002 | Female | 59 | Asian | SCN                  | <i>BRCA1</i>  | p.Ser1009Pro | chr17:41244523  | c.3025T>C         | Missense   | Novel | Negative     | Negative |
| P2002 | Female | 59 | Asian | SCN                  | <i>CFTR</i>   | p.Leu1414fs  | chr7:117305612  | c.4241delT        | Frameshift | Novel | Negative     | Negative |
| P2003 | Female | 52 | Asian | SCN                  | <i>ARID1A</i> | p.Leu1831Pro | chr1:27105881   | c.5492T>C         | Missense   | Novel | Colon polyp  | Negative |
| P2004 | Male   | 68 | Asian | GIST                 | <i>ERCC4</i>  | p.Ile634Val  | chr16:14031711  | c.1900A>G         | Missense   | Novel | Lung cancer  | Negative |
| P2007 | Male   | 72 | Asian | MCN                  | <i>ARID1A</i> | p.Leu2170Pro | chr1:27106898   | c.6509T>C         | Missense   | Novel | Negative     | Negative |
| P2009 | Male   | 74 | Asian | Acute pancreatitis   | <i>BRCA1</i>  | p.Ala1248Val | chr17:41243805  | c.3743C>T         | Missense   | Novel | Negative     | Negative |
| P2010 | Male   | 85 | Asian | Acute pancreatitis   | <i>ERBB2</i>  | p.Val725Met  | chr17:37879878  | c.2173G>A         | Missense   | Novel | Negative     | Negative |
| P2011 | Male   | 56 | Asian | Acute pancreatitis   | <i>BRCA2</i>  | p.Lys457Thr  | chr13:32906985  | c.1370A>C         | Missense   | Novel | Negative     | Negative |
| P2011 | Male   | 56 | Asian | Acute pancreatitis   | <i>BRCA2</i>  | p.Pro458Leu  | chr13:32906988  | c.1373C>T         | Missense   | Novel | Negative     | Negative |
| P2011 | Male   | 56 | Asian | Acute pancreatitis   | <i>BRCA2</i>  | p.Leu459Ile  | chr13:32906990  | c.1375T>A         | Missense   | Novel | Negative     | Negative |
| P2011 | Male   | 56 | Asian | Acute pancreatitis   | <i>CPA2</i>   | p.Ser364Gly  | chr7:129929417  | c.1090A>G         | Missense   | Novel | Negative     | Negative |
| P2011 | Male   | 56 | Asian | Acute pancreatitis   | <i>ERBB2</i>  | p.Leu455fs   | chr17:37872037  | c.1362delG        | Frameshift | Novel | Negative     | Negative |
| P2012 | Male   | 58 | Asian | Ampullary cancer     | <i>ARID1A</i> | p.Ser662Gly  | chr1:27087410   | c.1984A>G         | Missense   | Novel | Negative     | Negative |
| P2012 | Male   | 58 | Asian | Ampullary cancer     | <i>ATM</i>    | p.Lys1253Asn | chr11:108154966 | c.3759G>T         | Missense   | Novel | Negative     | Negative |

|       |        |    |       |                    |                 |              |                 |                       |            |       |             |                                                       |
|-------|--------|----|-------|--------------------|-----------------|--------------|-----------------|-----------------------|------------|-------|-------------|-------------------------------------------------------|
| P2012 | Male   | 58 | Asian | Ampullary cancer   | <i>BRCA1</i>    | p.Thr900Asn  | chr17:41244849  | c.2699C>A             | Missense   | Novel | Negative    | Negative                                              |
| P2012 | Male   | 58 | Asian | Ampullary cancer   | <i>PNLIPRP2</i> | p.Thr448Asn  | chr10:118401790 | c.1345C>A             | Missense   | Novel | Negative    | Negative                                              |
| P2015 | Male   | 66 | Asian | Acute pancreatitis | <i>FANCC</i>    | p.Leu375Pro  | chr9:97876941   | c.1124T>C             | Missense   | Novel | Negative    | Negative                                              |
| P2016 | Female | 36 | Asian | IPMN               | <i>BRCA2</i>    | p.Glu13Gly   | chr13:32890635  | c.38A>G               | Missense   | Novel | Negative    | Negative                                              |
| P2016 | Female | 36 | Asian | IPMN               | <i>HNF1B</i>    | p.Glu102Gly  | chr17:36104571  | c.305A>G              | Missense   | Novel | Negative    | Negative                                              |
| P2016 | Female | 36 | Asian | IPMN               | <i>MLH1</i>     | p.Lys618fs   | chr3:37089130   | c.1852_1853delA<br>A  | Frameshift | Novel | Negative    | Negative                                              |
| P2020 | Male   | 74 | Asian | PNET               | <i>MSH2</i>     | p.Gly195Arg  | chr2:47637449   | c.583G>A              | Missense   | Novel | Negative    | Negative                                              |
| P2021 | Female | 26 | Asian | Acute pancreatitis | <i>ARID1A</i>   | p.Leu1812Pro | chr1:27105824   | c.5435T>C             | Missense   | Novel | Negative    | Negative                                              |
| P2024 | Female | 63 | Asian | Acute pancreatitis | <i>BRCA1</i>    | p.Glu1282Lys | chr17:41243704  | c.3844G>A             | Missense   | Novel | Negative    | Negative                                              |
| P2024 | Female | 63 | Asian | Acute pancreatitis | <i>CFTR</i>     | p.Arg734Gly  | chr7:117232421  | c.2200A>G             | Missense   | Novel | Negative    | Negative                                              |
| P2026 | Female | 66 | Asian | Acute pancreatitis | <i>MSH6</i>     | p.Ser346Cys  | chr2:48026159   | c.1037C>G             | Missense   | VUS   | Negative    | Negative                                              |
| P2029 | Female | 50 | Asian | Acute pancreatitis | <i>TERT</i>     | p.Gly715Asp  | chr5:1278898    | c.2144G>A             | Missense   | Novel | Negative    | Negative                                              |
| P2030 | Female | 44 | Asian | GIST               | <i>BRCA1</i>    | p.Ser590fs   | chr17:41245776  | c.1769_1771delG<br>TA | Frameshift | Novel | Negative    | Negative                                              |
| P2030 | Female | 44 | Asian | GIST               | <i>BRCA2</i>    | p.Asp2680Asn | chr13:32937377  | c.8038G>A             | Missense   | Novel | Negative    | Negative                                              |
| P2032 | Male   | 64 | Asian | Duodenal carcinoma | <i>MSH6</i>     | p.Glu493Gly  | chr2:48026600   | c.1478A>G             | Missense   | Novel | Colon polyp | Mother with gastric cancer, brother with colon cancer |
| P2036 | Female | 53 | Asian | Acute pancreatitis | <i>BRIP1</i>    | p.Glu938Gly  | chr17:59763289  | c.2813A>G             | Missense   | Novel | Negative    | Negative                                              |
| P2037 | Male   | 45 | Asian | Acute pancreatitis | <i>BAP1</i>     | p.Ser628Ala  | chr3:52437162   | c.1882T>G             | Missense   | Novel | Negative    | Negative                                              |
| P2040 | Female | 53 | Asian | PNET               | <i>ATM</i>      | p.Tyr264Cys  | chr11:108115643 | c.791A>G              | Missense   | VUS   | Negative    | Negative                                              |
| P2040 | Female | 53 | Asian | PNET               | <i>NOC2L</i>    | p.Thr327fs   | chr1:888578     | c.978_979insGC        | Frameshift | Novel | Negative    | Negative                                              |
| P2042 | Female | 24 | Asian | SPT                | <i>BRIP1</i>    | p.Asn643Ile  | chr17:59857629  | c.1928A>T             | Missense   | Novel | Negative    | Negative                                              |
| P2042 | Female | 24 | Asian | SPT                | <i>HNF1B</i>    | p.Gln521His  | chr17:36059172  | c.1563G>C             | Missense   | Novel | Negative    | Negative                                              |
| P2045 | Male   | 49 | Asian | Acute pancreatitis | <i>ATM</i>      | p.Trp164Arg  | chr11:108106555 | c.490T>A              | Missense   | Novel | Negative    | Negative                                              |
| P2045 | Male   | 49 | Asian | Acute pancreatitis | <i>HNF1B</i>    | p.Pro412fs   | chr17:36065027  | c.1235delC            | Frameshift | Novel | Negative    | Negative                                              |

|       |        |    |       |                      |               |              |                 |                     |            |       |          |                            |
|-------|--------|----|-------|----------------------|---------------|--------------|-----------------|---------------------|------------|-------|----------|----------------------------|
| P2046 | Female | 48 | Asian | SCN                  | <i>BRCA2</i>  | p.Ser3303Asn | chr13:32972558  | c.9908G>A           | Missense   | VUS   | Negative | Negative                   |
| P2054 | Male   | 49 | Asian | Ampullary cancer     | <i>BRCA2</i>  | p.Val2610Leu | chr13:32936682  | c.7828G>C           | Missense   | Novel | Negative | Negative                   |
| P2055 | Male   | 62 | Asian | Cholangiocarcinoma   | <i>BRCA2</i>  | p.Ser636Pro  | chr13:32907521  | c.1906T>C           | Missense   | Novel | Negative | Negative                   |
| P2057 | Female | 76 | Asian | Cholangiocarcinoma   | <i>BRIP1</i>  | p.Lys966Glu  | chr17:59763206  | c.2896A>G           | Missense   | Novel | Negative | Negative                   |
| P2057 | Female | 76 | Asian | Cholangiocarcinoma   | <i>CFTR</i>   | p.Ser737fs   | chr7:117232429  | c.2208_2209insC     | Frameshift | Novel | Negative | Negative                   |
| P2058 | Male   | 38 | Asian | Acute pancreatitis   | <i>ARID1A</i> | p.Gln1327fs  | chr1:27100175   | c.3979_3980insC     | Frameshift | Novel | Negative | Negative                   |
| P2058 | Male   | 38 | Asian | Acute pancreatitis   | <i>BAP1</i>   | p.Arg512fs   | chr3:52437628   | c.1532_1533insTC    | Frameshift | Novel | Negative | Negative                   |
| P2058 | Male   | 38 | Asian | Acute pancreatitis   | <i>TNS3</i>   | p.Arg455Cys  | chr7:47408880   | c.1363C>T           | Missense   | Novel | Negative | Negative                   |
| P2061 | Male   | 66 | Asian | Duodenal carcinoma   | <i>CDH1</i>   | p.Asn637Ser  | chr16:68856102  | c.1910A>G           | Missense   | Novel | Negative | Negative                   |
| P2068 | Female | 13 | Asian | SPT                  | <i>PNLIP</i>  | p.Ala433fs   | chr10:118321108 | c.1296_1297delAG    | Frameshift | Novel | Negative | Negative                   |
| P2069 | Male   | 57 | Asian | PDAC                 | <i>CLPS</i>   | p.Arg22Gln   | chr6:35765000   | c.65G>A             | Missense   | Novel | Negative | Negative                   |
| P2069 | Male   | 57 | Asian | PDAC                 | <i>CPA2</i>   | p.Val137fs   | chr7:129912938  | c.407_408insA       | Frameshift | Novel | Negative | Negative                   |
| P2071 | Male   | 57 | Asian | Acute pancreatitis   | <i>CPA2</i>   | p.Glu380Gly  | chr7:129929466  | c.1139A>G           | Missense   | Novel | Negative | Negative                   |
| P2075 | Female | 65 | Asian | SCN                  | <i>ARID1A</i> | p.Asp1193Gly | chr1:27099341   | c.3578A>G           | Missense   | Novel | Negative | Negative                   |
| P2075 | Female | 65 | Asian | SCN                  | <i>ARID1A</i> | p.Gln1327fs  | chr1:27100183   | c.3980_3984delAGCAG | Frameshift | Novel | Negative | Negative                   |
| P2075 | Female | 65 | Asian | SCN                  | <i>CFTR</i>   | p.Leu1011fs  | chr7:117250612  | c.3032delT          | Frameshift | Novel | Negative | Negative                   |
| P2076 | Female | 70 | Asian | SCN                  | <i>CDH1</i>   | p.Lys381Glu  | chr16:68847219  | c.1141A>G           | Missense   | Novel | Negative | Negative                   |
| P2077 | Male   | 54 | Asian | Chronic pancreatitis | <i>IDO2</i>   | p.Lys229fs   | chr8:39847334   | c.684_685delCA      | Frameshift | Novel | Negative | Father with gastric cancer |
| P2077 | Male   | 54 | Asian | Chronic pancreatitis | <i>MLH1</i>   | p.Ser95Ala   | chr3:37042521   | c.283T>G            | Missense   | VUS   | Negative | Father with gastric cancer |
| P2079 | Male   | 21 | Asian | SPT                  | <i>RAD51C</i> | p.Gly98Ser   | chr17:56772438  | c.292G>A            | Missense   | Novel | Negative | Negative                   |
| P2084 | Female | 59 | Asian | PDAC                 | <i>ATM</i>    | p.Leu254Val  | chr11:108115612 | c.760T>G            | Missense   | Novel | Negative | Negative                   |
| P2084 | Female | 59 | Asian | PDAC                 | <i>CEL</i>    | p.Val197Ala  | chr9:135941959  | c.590T>C            | Missense   | Novel | Negative | Negative                   |
| P2086 | Female | 40 | Asian | PDAC                 | <i>BRCA2</i>  | p.Thr665Ile  | chr13:32910486  | c.1994C>T           | Missense   | Novel | Negative | Negative                   |
| P2086 | Female | 40 | Asian | PDAC                 | <i>BUB1B</i>  | p.Glu538fs   | chr15:40494648  | c.1610_1611insT     | Frameshift | Novel | Negative | Negative                   |
| P2088 | Female | 32 | Asian | PNET                 | <i>ARID1A</i> | p.Glu1006Gly | chr1:27094309   | c.3017A>G           | Missense   | Novel | Negative | Negative                   |
| P2089 | Male   | 64 | Asian | PNET                 | <i>TP53</i>   | p.Lys132Arg  | chr17:7578535   | c.395A>G            | Missense   | VUS   | Negative | Negative                   |

|       |        |    |       |                      |               |              |                |                         |            |       |                    |          |
|-------|--------|----|-------|----------------------|---------------|--------------|----------------|-------------------------|------------|-------|--------------------|----------|
| P2093 | Female | 64 | Asian | Chronic pancreatitis | <i>RECQL4</i> | p.Ala919Thr  | chr8:145738230 | c.2755G>A               | Missense   | VUS   | Negative           | Negative |
| P2102 | Female | 47 | Asian | MCN                  | <i>BRIP1</i>  | p.Ile552Val  | chr17:59858341 | c.1654A>G               | Missense   | VUS   | Negative           | Negative |
| P2104 | Female | 53 | Asian | SCN                  | <i>MLH1</i>   | p.Arg497Trp  | chr3:37070354  | c.1489C>T               | Missense   | VUS   | Negative           | Negative |
| P2139 | Male   | 62 | Asian | Acute pancreatitis   | <i>ARID1A</i> | p.Gln1411fs  | chr1:27100948  | c.4231_4236delCAGCCT    | Frameshift | Novel | Negative           | Negative |
| P2142 | Male   | 75 | Asian | Cholangiocarcinoma   | <i>FANCA</i>  | p.Pro799Ser  | chr16:89836354 | c.2395C>T               | Missense   | VUS   | Negative           | Negative |
| P2151 | Male   | 61 | Asian | PNET                 | <i>CTRC</i>   | p.Thr58Met   | chr1:15767029  | c.173C>T                | Missense   | Novel | Negative           | Negative |
| P2151 | Male   | 61 | Asian | PNET                 | <i>CDKN2A</i> | p.Val115Glu  | chr9:21971014  | c.344T>A                | Missense   | VUS   | Negative           | Negative |
| P2159 | Male   | 76 | Asian | IPMN                 | <i>BRCA2</i>  | p.Asp2438Asn | chr13:32929302 | c.7312G>A               | Missense   | Novel | Negative           | Negative |
| P2164 | Male   | 35 | Asian | PNET                 | <i>FANCL</i>  | p.Asp213Asn  | chr2:58392928  | c.637G>A                | Missense   | VUS   | Negative           | Negative |
| P2164 | Male   | 35 | Asian | PNET                 | <i>TNS3</i>   | p.Ser383fs   | chr7:47409086  | c.1148_1156delGTGACCACA | Frameshift | Novel | Negative           | Negative |
| P2165 | Male   | 57 | Asian | Duodenal carcinoma   | <i>PMS2</i>   | p.Arg295Trp  | chr7:6035185   | c.883C>T                | Missense   | VUS   | Negative           | Negative |
| P2168 | Female | 72 | Asian | Ampullary cancer     | <i>CELA3A</i> | p.Pro156His  | chr1:22333475  | c.467C>A                | Missense   | Novel | Negative           | Negative |
| P2176 | Female | 47 | Asian | PNET                 | <i>BRCA2</i>  | p.Asn1805Asp | chr13:32913905 | c.5413A>G               | Missense   | VUS   | Negative           | Negative |
| P2181 | Male   | 79 | Asian | GIST                 | <i>MLH1</i>   | p.Leu259Ser  | chr3:37056021  | c.776T>C                | Missense   | VUS   | Negative           | Negative |
| P2182 | Male   | 60 | Asian | PDAC                 | <i>MSH6</i>   | p.Leu782Pro  | chr2:48027467  | c.2345T>C               | Missense   | Novel | Negative           | Negative |
| P2184 | Male   | 53 | Asian | PDAC                 | <i>ERBB2</i>  | p.Met347fs   | chr17:37868592 | c.1039_1040insC         | Frameshift | Novel | Negative           | Negative |
| P2185 | Female | 70 | Asian | PDAC                 | <i>FANCG</i>  | p.Tyr290Cys  | chr9:35076776  | c.869A>G                | Missense   | Novel | Acute pancreatitis | Negative |
| P2191 | Female | 62 | Asian | PDAC                 | <i>TNS3</i>   | p.Leu520Phe  | chr7:47408685  | c.1558C>T               | Missense   | Novel | Negative           | Negative |
| P2192 | Female | 63 | Asian | PDAC                 | <i>ARID1A</i> | p.Gln1327fs  | chr1:27100181  | c.3999_4001delGCA       | Frameshift | Novel | Negative           | Negative |
| P2196 | Male   | 66 | Asian | PDAC                 | <i>RNF43</i>  | p.Arg650Ter  | chr17:56435189 | c.1948C>T               | Nonsense   | Novel | Negative           | Negative |
| P2208 | Male   | 69 | Asian | PDAC                 | <i>BRCA2</i>  | p.Glu1213Asp | chr13:32912131 | c.3639A>C               | Missense   | Novel | Negative           | Negative |
| P2210 | Female | 47 | Asian | PDAC                 | <i>TNS3</i>   | p.Pro633Ser  | chr7:47408346  | c.1897C>T               | Missense   | Novel | Negative           | Negative |
| P2211 | Male   | 71 | Asian | PDAC                 | <i>TNS3</i>   | p.Glu231Lys  | chr7:47451357  | c.691G>A                | Missense   | Novel | Negative           | Negative |
| P2218 | Male   | 80 | Asian | PDAC                 | <i>TNS3</i>   | p.Arg158Trp  | chr7:47463700  | c.472C>T                | Missense   | Novel | Negative           | Negative |
| P2222 | Male   | 56 | Asian | PDAC                 | <i>CTRC</i>   | p.Arg119His  | chr1:15769068  | c.356G>A                | Missense   | VUS   | Negative           | Negative |
| P2222 | Male   | 56 | Asian | PDAC                 | <i>TERT</i>   | p.Arg599Trp  | chr5:1280428   | c.1795C>T               | Missense   | Novel | Negative           | Negative |
| P2224 | Male   | 51 | Asian | PDAC                 | <i>SPINK1</i> | p.Pro45Leu   | chr5:147207645 | c.134C>T                | Missense   | Novel | Negative           | Negative |
| P2227 | Male   | 60 | Asian | PDAC                 | <i>MSH6</i>   | p.Thr1282Ser | chr2:48033634  | c.3845C>G               | Missense   | Novel | Negative           | Negative |
| P2230 | Female | 64 | Asian | PDAC                 | <i>CPA1</i>   | p.Arg169Leu  | chr7:130023254 | c.506G>T                | Missense   | Novel | Negative           | Negative |



|       |        |    |       |      |               |              |                 |                 |            |       |          |          |
|-------|--------|----|-------|------|---------------|--------------|-----------------|-----------------|------------|-------|----------|----------|
| P2238 | Male   | 80 | Asian | PDAC | <i>FANCA</i>  | p.Glu559Lys  | chr16:89846317  | c.1675G>A       | Missense   | VUS   | Negative | Negative |
| P2238 | Male   | 80 | Asian | PDAC | <i>CFTR</i>   | p.Asp984Asn  | chr7:117246769  | c.2950G>A       | Missense   | Novel | Negative | Negative |
| P2238 | Male   | 80 | Asian | PDAC | <i>PRSS1</i>  | p.Trp57Ter   | chr7:142458536  | c.171G>A        | Nonsense   | Novel | Negative | Negative |
| P2243 | Male   | 73 | Asian | PDAC | <i>CTRC</i>   | p.Val69Ile   | chr1:15767061   | c.205G>A        | Missense   | Novel | Negative | Negative |
| P2243 | Male   | 73 | Asian | PDAC | <i>PALB2</i>  | p.Arg686Ser  | chr16:23641417  | c.2058G>T       | Missense   | VUS   | Negative | Negative |
| P2244 | Male   | 77 | Asian | PDAC | <i>FANCA</i>  | p.Val109Met  | chr16:89877438  | c.325G>A        | Missense   | Novel | Negative | Negative |
| P2248 | Male   | 63 | Asian | PDAC | <i>MSH2</i>   | p.Val17Ile   | chr2:47630379   | c.49G>A         | Missense   | VUS   | Negative | Negative |
| P2252 | Female | 61 | Asian | PDAC | <i>CELA2A</i> | p.Val68Phe   | chr1:15788128   | c.202G>T        | Missense   | Novel | Negative | Negative |
| P2252 | Female | 61 | Asian | PDAC | <i>MSH6</i>   | p.Thr212Arg  | chr2:48025757   | c.635C>G        | Missense   | VUS   | Negative | Negative |
| P2260 | Male   | 59 | Asian | PDAC | <i>BRIP1</i>  | p.Asn643Ile  | chr17:59857629  | c.1928A>T       | Missense   | Novel | Negative | Negative |
| P2265 | Male   | 66 | Asian | PDAC | <i>ATM</i>    | p.Phe2140Leu | chr11:108190753 | c.6420C>A       | Missense   | VUS   | Negative | Negative |
| P2276 | Male   | 46 | Asian | PDAC | <i>ERBB2</i>  | p.Trp482Arg  | chr17:37872123  | c.1444T>C       | Missense   | Novel | Negative | Negative |
| P2280 | Male   | 73 | Asian | PDAC | <i>CFTR</i>   | p.Gly1069Arg | chr7:117251700  | c.3205G>A       | Missense   | VUS   | Negative | Negative |
| P2294 | Male   | 57 | Asian | PDAC | <i>PALB2</i>  | p.Ser1075Arg | chr16:23619310  | c.3225T>A       | Missense   | VUS   | Negative | Negative |
| P2308 | Female | 62 | Asian | PDAC | <i>PMS2</i>   | p.Cys192Ser  | chr7:6038869    | c.575G>C        | Missense   | Novel | Negative | Negative |
| P2312 | Male   | 65 | Asian | PDAC | <i>ATM</i>    | p.Ile2878Met | chr11:108218055 | c.8634A>G       | Missense   | VUS   | Negative | Negative |
| P2322 | Male   | 80 | Asian | PDAC | <i>IDO2</i>   | p.Ala96Thr   | chr8:39836637   | c.286G>A        | Missense   | Novel | Negative | Negative |
| P2324 | Male   | 60 | Asian | PDAC | <i>TNS3</i>   | p.Leu520Phe  | chr7:47408685   | c.1558C>T       | Missense   | Novel | Negative | Negative |
| P2335 | Male   | 64 | Asian | PDAC | <i>CDH1</i>   | p.Arg50His   | chr16:68772300  | c.149G>A        | Missense   | Novel | Negative | Negative |
| P2337 | Female | 66 | Asian | PDAC | <i>BRCA2</i>  | p.Ile3025Thr | chr13:32954007  | c.9074T>C       | Missense   | VUS   | Negative | Negative |
| P2353 | Male   | 63 | Asian | PDAC | <i>ARID1A</i> | p.Ala1522Thr | chr1:27101282   | c.4564G>A       | Missense   | Novel | Negative | Negative |
| P2354 | Male   | 72 | Asian | PDAC | <i>BRCA2</i>  | p.Ala2825Glu | chr13:32944681  | c.8474C>A       | Missense   | VUS   | Negative | Negative |
| P2371 | Male   | 69 | Asian | PDAC | <i>BRCA1</i>  | p.Gln1096Arg | chr17:41244261  | c.3287A>G       | Missense   | VUS   | Negative | Negative |
| P2377 | Male   | 65 | Asian | PDAC | <i>IDO2</i>   | p.Pro240Thr  | chr8:39862857   | c.718C>A        | Missense   | Novel | Negative | Negative |
| P2394 | Male   | 66 | Asian | PDAC | <i>ATM</i>    | p.Asp2987Tyr | chr11:108235917 | c.8959G>T       | Missense   | VUS   | Negative | Negative |
| P2395 | Male   | 85 | Asian | PDAC | <i>MSH6</i>   | p.Asn1273Lys | chr2:48033608   | c.3819T>G       | Missense   | VUS   | Negative | Negative |
| P2406 | Female | 66 | Asian | PDAC | <i>TNS3</i>   | p.Gly607Trp  | chr7:47408424   | c.1819G>T       | Missense   | Novel | Negative | Negative |
| P2409 | Female | 53 | Asian | PDAC | <i>BUB1B</i>  | p.Lys540fs   | chr15:40494657  | c.1619_1620insT | Frameshift | Novel | Negative | Negative |
| P2410 | Male   | 67 | Asian | PDAC | <i>HNF1B</i>  | p.Ser80Cys   | chr17:36104637  | c.239C>G        | Missense   | Novel | Negative | Negative |
| P2428 | Female | 42 | Asian | PNET | <i>RNF43</i>  | p.Arg668Trp  | chr17:56435135  | c.2002C>T       | Missense   | Novel | Negative | Negative |
| P2441 | Female | 64 | Asian | PNET | <i>XRCC3</i>  | p.Arg150Cys  | chr14:104169623 | c.448C>T        | Missense   | Novel | Negative | Negative |
| P2448 | Male   | 47 | Asian | PNET | <i>STK11</i>  | p.Pro387Arg  | chr19:1226504   | c.1160C>G       | Missense   | Novel | Negative | Negative |

|       |        |    |       |                      |               |              |                 |                   |            |       |             |                           |
|-------|--------|----|-------|----------------------|---------------|--------------|-----------------|-------------------|------------|-------|-------------|---------------------------|
| P2449 | Male   | 70 | Asian | PNET                 | <i>PALB2</i>  | p.Arg686Ser  | chr16:23641417  | c.2058G>T         | Missense   | VUS   | Negative    | Negative                  |
| P2450 | Male   | 44 | Asian | PNET                 | <i>BRCA1</i>  | p.Asp1578Gly | chr17:41226353  | c.4733A>G         | Missense   | VUS   | Negative    | Negative                  |
| P2450 | Male   | 44 | Asian | PNET                 | <i>PALB2</i>  | p.Asp360Asn  | chr16:23646789  | c.1078G>A         | Missense   | Novel | Negative    | Negative                  |
| P2453 | Male   | 49 | Asian | Chronic pancreatitis | <i>FANCC</i>  | p.Thr503Met  | chr9:97869373   | c.1508C>T         | Missense   | VUS   | Negative    | Negative                  |
| P2455 | Female | 36 | Asian | Acute pancreatitis   | <i>BRIP1</i>  | p.Ser1109Ile | chr17:59761081  | c.3326G>T         | Missense   | Novel | Negative    | Negative                  |
| P2456 | Male   | 36 | Asian | Chronic pancreatitis | <i>MSH2</i>   | p.Ile511Phe  | chr2:47693817   | c.1531A>T         | Missense   | Novel | Negative    | Negative                  |
| P2458 | Male   | 66 | Asian | PNET                 | <i>PALB2</i>  | p.Pro113Ala  | chr16:23647530  | c.337C>G          | Missense   | VUS   | Negative    | Uncle with gastric cancer |
| P2471 | Female | 72 | Asian | IPMN                 | <i>BUB1</i>   | p.Phe962Val  | chr2:111398682  | c.2884T>G         | Missense   | Novel | Lung cancer | Negative                  |
| P2472 | Female | 31 | Asian | IPMN                 | <i>CELA3B</i> | p.Val198Met  | chr1:22310774   | c.592G>A          | Missense   | Novel | Negative    | Negative                  |
| P2482 | Male   | 41 | Asian | Acute pancreatitis   | <i>MLH1</i>   | p.Ser577Leu  | chr3:37083821   | c.1730C>T         | Missense   | VUS   | Negative    | Negative                  |
| P2482 | Male   | 41 | Asian | Acute pancreatitis   | <i>RECQL4</i> | p.Arg780Trp  | chr8:145738726  | c.2338C>T         | Missense   | VUS   | Negative    | Negative                  |
| P2483 | Female | 73 | Asian | Acute pancreatitis   | <i>HNF4G</i>  | p.Ala213Thr  | chr8:76468238   | c.637G>A          | Missense   | Novel | Negative    | Negative                  |
| P2501 | Male   | 66 | Asian | Acute pancreatitis   | <i>ATM</i>    | p.Leu1956His | chr11:108180991 | c.5867T>A         | Missense   | VUS   | Negative    | Negative                  |
| P2508 | Female | 60 | Asian | Acute pancreatitis   | <i>FANCG</i>  | p.Ser387fs   | chr9:35075737   | c.1157_1158insG   | Frameshift | Novel | Negative    | Negative                  |
| P2525 | Female | 29 | Asian | SCN                  | <i>ARIDIA</i> | p.Gly2040Arg | chr1:27106507   | c.6118G>A         | Missense   | Novel | Negative    | Negative                  |
| P2526 | Female | 58 | Asian | SCN                  | <i>RECQL4</i> | p.Leu828Gln  | chr8:145738502  | c.2483T>A         | Missense   | Novel | Negative    | Negative                  |
| P2544 | Male   | 59 | Asian | SPT                  | <i>ATM</i>    | p.Leu846Val  | chr11:108137967 | c.2536C>G         | Missense   | Novel | Negative    | Negative                  |
| P2545 | Female | 75 | Asian | Cholangiocarcinoma   | <i>BUB1B</i>  | p.Lys539fs   | chr15:40494654  | c.1616_1617insT   | Frameshift | Novel | Negative    | Negative                  |
| P2547 | Male   | 62 | Asian | IPMN                 | <i>CFTR</i>   | p.Gly1069Arg | chr7:117251700  | c.3205G>A         | Missense   | VUS   | Negative    | Negative                  |
| P2558 | Male   | 27 | Asian | IPMN                 | <i>TNS3</i>   | p.Leu520Phe  | chr7:47408685   | c.1558C>T         | Missense   | Novel | Negative    | Negative                  |
| P2564 | Female | 39 | Asian | PNET                 | <i>CEL</i>    | p.Ala434fs   | chr9:135945850  | c.1298_1299insC   | Frameshift | Novel | Negative    | Negative                  |
| P2568 | Female | 60 | Asian | PDAC                 | <i>CEL</i>    | p.Arg119Trp  | chr9:135940432  | c.355C>T          | Missense   | Novel | Negative    | Negative                  |
| P2571 | Female | 62 | Asian | PNET                 | <i>ARIDIA</i> | p.Pro1169Ala | chr1:27099089   | c.3505C>G         | Missense   | Novel | Negative    | Negative                  |
| P2571 | Female | 62 | Asian | PNET                 | <i>FANCA</i>  | p.Leu521Phe  | chr16:89849420  | c.1561C>T         | Missense   | Novel | Negative    | Negative                  |
| P2573 | Female | 42 | Asian | MCN                  | <i>BRCA2</i>  | p.Ter3419fs  | chr13:32972904  | c.10255_10256insT | Frameshift | Novel | Negative    | Negative                  |
| P2595 | Male   | 77 | Asian | Chronic pancreatitis | <i>PALB2</i>  | p.Val805Ala  | chr16:23641061  | c.2414T>C         | Missense   | Novel | Negative    | Negative                  |

| <b>eTable 5. Clinicopathologic Characteristics of patients with germline mutation and wild-type cases.</b> |                                          |                  |                           |
|------------------------------------------------------------------------------------------------------------|------------------------------------------|------------------|---------------------------|
| <b>Characteristics</b>                                                                                     | <b>With Deleterious Germline Variant</b> | <b>Wild-type</b> | <b><i>p</i><br/>Value</b> |
|                                                                                                            | <b>(n=63)</b>                            | <b>(n=946)</b>   |                           |
| Age, years                                                                                                 |                                          |                  |                           |
| Mean (SD)                                                                                                  | 63.4 (9.9)                               | 62.8 (10.3)      | 0.88                      |
| Gender, n (%)                                                                                              |                                          |                  |                           |
| Male                                                                                                       | 47                                       | 580              | 0.04                      |
| Female                                                                                                     | 16                                       | 366              |                           |
| Family History of PDAC                                                                                     |                                          |                  | 0.44                      |
| Yes                                                                                                        | 1                                        | 8                |                           |
| Location of tumor                                                                                          |                                          |                  |                           |
| Head/Neck                                                                                                  | 44                                       | 653              | 1.00                      |
| Body/Tail                                                                                                  | 19                                       | 253              |                           |
| Stage                                                                                                      |                                          |                  |                           |
| Resectable/Borderline resectable                                                                           | 22                                       | 297              | 0.58                      |
| Locally advanced /Metastatic                                                                               | 41                                       | 649              |                           |

| <b>eTable 6. Comparison of Nanjing cohort and Johns Hopkins Cohort on the pathogenic germline mutations of PDAC patients.</b> |                                     |                    |                                         |                    |                            |
|-------------------------------------------------------------------------------------------------------------------------------|-------------------------------------|--------------------|-----------------------------------------|--------------------|----------------------------|
| <b>Gene</b>                                                                                                                   | <b>Nanjing Cohort</b>               |                    | <b>Johns Hopkins Cohort<sup>b</sup></b> |                    | <b>P value<sup>a</sup></b> |
|                                                                                                                               | <b>Cases with Germline mutation</b> | <b>Total cases</b> | <b>Cases with Germline mutation</b>     | <b>Total cases</b> |                            |
| <i>ATM</i>                                                                                                                    | 5                                   | 1,009              | 10                                      | 854                | 0.12                       |
| <i>BRCA1</i>                                                                                                                  | 3                                   | 1,009              | 2                                       | 854                | 1.00                       |
| <i>BRCA2</i>                                                                                                                  | 9                                   | 1,009              | 12                                      | 854                | 0.38                       |
| <i>PALB2</i>                                                                                                                  | 6                                   | 1,009              | 2                                       | 854                | 0.30                       |
| <i>BUB3</i>                                                                                                                   | 0                                   | 1,009              | 1                                       | 854                | 0.46                       |
| <i>BRIP1</i>                                                                                                                  | 3                                   | 1,009              | 0                                       | 854                | 0.26                       |
| <i>CDH1</i>                                                                                                                   | 0                                   | 1,009              | 1                                       | 854                | 0.46                       |
| <i>CDKN2A</i>                                                                                                                 | 0                                   | 1,009              | 1                                       | 854                | 0.46                       |
| <i>FANCC</i>                                                                                                                  | 2                                   | 1,009              | 0                                       | 854                | 0.50                       |
| <i>RAD51B</i>                                                                                                                 | 0                                   | 1,009              | 1                                       | 854                | 0.46                       |
| <i>RAD51D</i>                                                                                                                 | 3                                   | 1,009              | 1                                       | 854                | 0.63                       |
| <i>TP53</i>                                                                                                                   | 1                                   | 1,009              | 1                                       | 854                | 1.00                       |
| <i>XRCC2</i>                                                                                                                  | 1                                   | 1,009              | 0                                       | 854                | 1.00                       |
| <sup>a</sup> , Remain significant at $P < 0.004$ if Bonferroni correction is used.                                            |                                     |                    |                                         |                    |                            |
| <sup>b</sup> , Clinical significance of variants was re-evaluated and updated to July 2020.                                   |                                     |                    |                                         |                    |                            |

| <b>eTable 7. Prevalence of pathogenic germline mutations in non-PDAC and Chinese population.</b>                                                    |               |                     |                   |                   |            |                                                  |                          |                           |         |
|-----------------------------------------------------------------------------------------------------------------------------------------------------|---------------|---------------------|-------------------|-------------------|------------|--------------------------------------------------|--------------------------|---------------------------|---------|
| Disease                                                                                                                                             | Gene          | Chromosome Position | Amino Acid Change | Nucleotide Change | Function   | Gene group                                       | Nanjing Allele Count (%) | ChinaMap Allele Count (%) | P-value |
| IPMN                                                                                                                                                | <i>ATM</i>    | chr11:108151896     | Splice            | c.3576+1G>A       | Noncoding  | Pancreatic cancer susceptibility genes           | 1/140 (0.71)             | 0/21,176 (0)              | < 0.01  |
| IPMN                                                                                                                                                | <i>RECQL4</i> | chr8:145738229      | Splice            | c.2755+1G>A       | Noncoding  | Candidate pancreatic cancer susceptibility genes | 1/140 (0.71)             | 0/21,176 (0)              | < 0.01  |
| Acute pancreatitis                                                                                                                                  | <i>CFTR</i>   | chr7:117149143      | p.Arg74Trp        | c.220C>T          | Missense   | Pancreatitis associated genes                    | 2/710 (0.28)             | 20/21,176 (0.09)          | 0.340   |
| Cholangiocarcinoma                                                                                                                                  | <i>PALB2</i>  | chr16:23625413      | Splice            | c.3114-1G>A       | Noncoding  | Pancreatic cancer susceptibility genes           | 1/70 (1.43)              | 1/21,176 (0.005)          | < 0.01  |
| Chronic pancreatitis                                                                                                                                | <i>BRIP1</i>  | chr17:59937230      | p.Leu43fs         | c.128_131delTGTT  | Frameshift | Candidate pancreatic cancer susceptibility genes | 1/196 (0.51)             | 1/21,176 (0.005)          | < 0.01  |
| Chronic pancreatitis                                                                                                                                | <i>PRSSI</i>  | chr7:142459789      | p.Arg122His       | c.365G>A          | Missense   | Pancreatic cancer susceptibility genes           | 1/196 (0.51)             | 0/21,176 (0)              | < 0.01  |
| Chronic pancreatitis                                                                                                                                | <i>SPINK1</i> | chr5:147207583      | Splice            | c.194+2T>C        | Noncoding  | Pancreatitis associated genes                    | 19/196 (9.69)            | 114/21,176 (0.54)         | < 0.01  |
| PNET                                                                                                                                                | <i>BRCA1</i>  | chr17:41243677      | p.Lys1290fs       | c.3869_3870delAA  | Frameshift | Pancreatic cancer susceptibility genes           | 1/238 (0.42)             | 0/21,176 (0)              | 0.01    |
| PNET/Acute pancreatitis                                                                                                                             | <i>CFTR</i>   | chr7:117246728      | p.Gly970Asp       | c.2909G>A         | Missense   | Pancreatitis associated genes                    | 2/948 (0.21)             | 15/21,176 (0.07)          | 0.36    |
| SCN                                                                                                                                                 | <i>BRCA2</i>  | chr13:32913456      | p.Tyr1655Ter      | c.4965delC        | Nonsense   | Pancreatic cancer susceptibility genes           | 1/64 (1.56)              | 0/21,176 (0)              | < 0.01  |
| SCN                                                                                                                                                 | <i>CFTR</i>   | chr7:117175301      | Splice            | c.580-1G>T        | Noncoding  | Pancreatitis associated genes                    | 1/64 (1.56)              | 0/21,176 (0)              | < 0.01  |
| SPT                                                                                                                                                 | <i>ATM</i>    | chr11:108121593     | p.Lys468fs        | c.1402_1403delAA  | Frameshift | Pancreatic cancer susceptibility genes           | 1/112 (0.89)             | 1/21,176 (0.005)          | < 0.01  |
| SPT                                                                                                                                                 | <i>PALB2</i>  | chr16:23634452      | Splice            | c.2835-1G>C       | Noncoding  | Pancreatic cancer susceptibility genes           | 1/112 (0.89)             | 0/21,176 (0)              | < 0.01  |
| IPMN, intraductal papillary mucinous neoplasm; SCN, serous cystic noplasm; SPT, solid pseudopapillary tumor; PNET, pancreatic neuroendocrine tumor. |               |                     |                   |                   |            |                                                  |                          |                           |         |
